# Supplementary material for: Palladium-catalyzed [3 + 2] cycloaddition of 4-vinyl-4-butyrolactones with sulfamate-derived cyclic imines: construction of sulfamate-fused pyrrolidines
Source: Royal Society of Chemistry journal article supplement (doi:10.1039/d4ob01611d), 2024-11-06
Supplement: d4ob01611d1.pdf [file d4ob01611d1.pdf]

Electronic Supplementary Information

**Palladium-Catalyzed [3+2] Cycloaddition of 4-Vinyl-4-Butyrolactones with Sulfamate-Derived Cyclic Imines:  
Construction of Sulfamate-Fused Pyrrolidines**

Honghao Sun,<sup>ab</sup> Siyuan Ding,<sup>a</sup> Bo Wang,<sup>\*b</sup> Jiaying Huang,<sup>\*a</sup> and Hongchao Guo<sup>\*a</sup>

<sup>a</sup> Department of Chemistry and Innovation Center of Pesticide Research, China Agricultural University, Beijing 100193, P. R. China

<sup>b</sup> Institute of Food Science and Technology, Chinese Academy of Agricultural Sciences, Beijing, 100193, China

E-mail: hchguo@cau.edu.cn, 05084@cau.edu.cn, 362395987@qq.com

**Contents**

|                                                                |     |
|----------------------------------------------------------------|-----|
| General Information                                            | S2  |
| Preparation of Starting Materials                              | S2  |
| General Procedure for Pd-Catalyzed [3+2] Annulation            | S2  |
| The Scaled-up Reaction                                         | S2  |
| Further Transformation of the Product                          | S3  |
| Investigation on Asymmetric [3+2] Cycloaddition                | S3  |
| Characterization Data of Products                              | S4  |
| <sup>1</sup> H NMR and <sup>13</sup> C NMR Spectra of Products | S13 |
| HPLC Chromatogram of Product <b>3aa</b>                        | S40 |
| X-Ray Crystallographic Data                                    | S41 |

## General Information.

All reactions were performed under argon atmosphere in oven-dried glassware with magnetic stirring. Unless otherwise stated, all reagents were purchased from commercial suppliers and used without further purification. All solvents were purified and dried according to standard methods prior to use. Organic solutions were concentrated under reduced pressure on a rotary evaporator or an oil pump. Reactions were monitored by thin layer chromatography (TLC) on silica gel precoated glass plates. Chromatograms were visualized by fluorescence quenching with UV light at 254 nm. Flash column chromatography was performed using flash silica gel (200–300 mesh).  $^1\text{H}$  and  $^{13}\text{C}$  NMR spectra were recorded in  $\text{CDCl}_3$  using 500 MHz NMR instrument (referenced internally to  $\text{Me}_4\text{Si}$ ).  $^1\text{H}$  NMR data are reported as follows: chemical shift, multiplicity (s = singlet; d = doublet; q = quartet; m = multiplet; br = broad), coupling constant (Hz), and integral. Data for  $^{13}\text{C}$  NMR spectra are reported in terms of chemical shift. Accurate mass measurements were performed using an instrument with the ESI-Linear ion trap-MS technique.

## Preparation of Starting Materials

The 4-vinyl-4-butyrolactones **1**<sup>1</sup> and sulfamate-derived cyclic imines **2**<sup>2</sup> were synthesized using known literature procedures.

## General Procedure for Pd-Catalyzed [3+2] Annulation

Under argon atmosphere, to a mixture of **1** (0.12 mmol), **2** (0.10 mmol), catalyst  $\text{Pd}_2(\text{dba})_3 \cdot \text{CHCl}_3$  (5 mol%) and 1.10-phen (10 mol%) in an oven-dried Schlenk tube was added 1 mL of DCE at 25 °C. The resulting mixture was stirred until the starting material was completely consumed (monitored by TLC) and then was concentrated to dryness. The residue was purified through flash column chromatography (petroleum ether/EtOAc) to give the corresponding products **3**.

## The Scaled-up Reaction

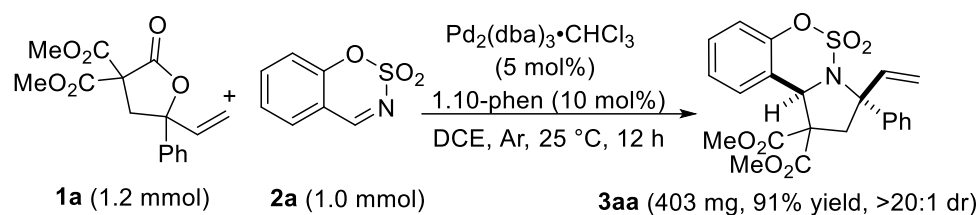

An oven-dried 100 mL of Schlenk tube was charged with **1a** (1.2 mmol, 365 mg), **2a** (1.0 mmol, 183 mg),  $\text{Pd}_2(\text{dba})_3 \cdot \text{CHCl}_3$  (5 mol%), 1.10-phen (10 mol%), and 10 mL of DCE under argon atmosphere. The reaction mixture was stirred at 25 °C. Once the starting material was completely consumed (monitored by TLC), the mixture was concentrated to dryness. The

1. Sun, H.; Song, A.; Gu, S.; Tang, Y.; Yang, S.; Li, W.; Guo, H. *J. Org. Chem.* 2024, **89**, 14141-14150.

2. Liu, M.; Liao, J.; Dong, Y.; Shi, W.; Hu, Y.; Xu, J.; Wang, W.; Xu, Y.; Guo, H. *Adv. Synth. Catal.* 2022, **364**, 2146–2151.

residue was purified by flash column chromatography (petroleum ether/EtOAc) to afford the product **3aa** (403 mg, 91% yield, >20:1 dr).

### Further Transformation of the Product

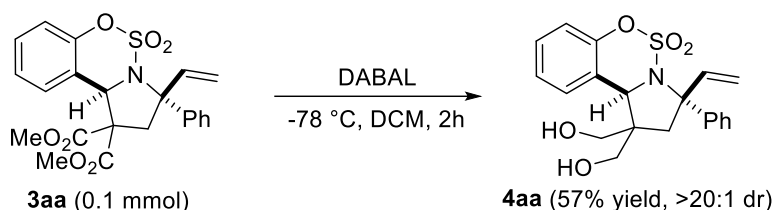

Under argon atmosphere, to a solution of **3aa** (0.1 mmol) in DCM was added DABAL (0.8 mmol) at  $-78\text{ }^{\circ}\text{C}$ . Once the starting material was completely consumed (monitored by TLC), the mixture was concentrated to dryness. The residue was purified by flash column chromatography (petroleum ether/EtOAc) to afford the product **4aa** (57% yield, >20:1 dr).

### Investigation on Asymmetric [3+2] Cycloaddition

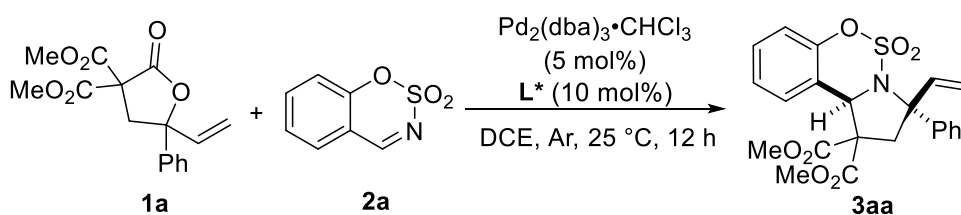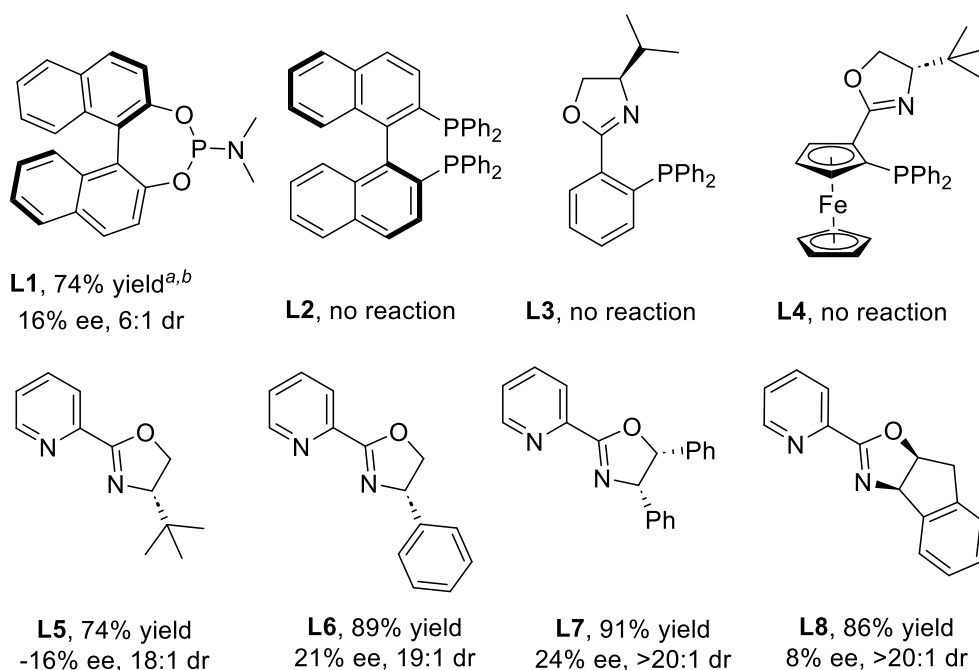

<sup>a</sup> Reactions of **1a** (0.12 mmol) and **2a** (0.10 mmol) were performed in the presence of  $\text{Pd}_2(\text{dba})_3 \cdot \text{CHCl}_3$  (5 mol%) and  $\text{L}^*$  (10 mol%) in 1 mL of DCE at  $15\text{ }^{\circ}\text{C}$  for 12 h. <sup>b</sup> Isolated yield.

## Characterization Data of Products

### *Dimethyl 3-phenyl-3-vinyl-2,3-dihydrobenzo[e]pyrrolo[1, 2-c][1,2,3]oxathiazine-1,1(10bH)-dicarboxylate 5,5-dioxide (3aa).*

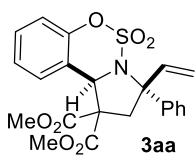

White solid (41.4 mg, 93% yield, >20:1 dr), mp: 134 – 135 °C. It was purified by flash column chromatography (petroleum ether/EtOAc =8:1); <sup>1</sup>H NMR (500 MHz, CDCl<sub>3</sub>) δ 7.40 – 7.34 (m, 2H), 7.33 – 7.19 (m, 4H), 7.07 (td, *J* = 7.7, 1.3 Hz, 1H), 6.97 (td, *J* = 7.8, 7.1, 1.3 Hz, 2H), 6.31 (dd, *J* = 17.2, 10.6 Hz, 1H), 6.01 (s, 1H), 5.28 (d, *J* = 10.6 Hz, 1H), 4.96 (d, *J* = 17.2 Hz, 1H), 3.57 (s, 3H), 3.26 (s, 3H), 3.08 (d, *J* = 13.7 Hz, 1H), 3.02 (d, *J* = 13.7 Hz, 1H); <sup>13</sup>C NMR (126 MHz, CDCl<sub>3</sub>) δ 168.7, 167.7, 151.7, 140.0, 138.8, 129.9, 128.2, 127.8, 127.4, 126.0, 125.1, 119.6, 119.5, 118.3, 73.8, 67.0, 63.2, 53.13, 53.08, 45.5; HRMS (ESI) calculated for C<sub>22</sub>H<sub>22</sub>NO<sub>7</sub>S<sup>+</sup> [M + H]<sup>+</sup> 444.1111, found 444.1121.

### *Dimethyl 8-fluoro-3-phenyl-3-vinyl-2,3-dihydrobenzo[e] pyrrolo[1,2-c][1,2,3]oxathiazine-1,1(10bH)-dicarboxylate 5,5 -dioxide (3ab).*

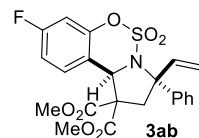

White solid (41.2 mg, 89% yield, >20:1 dr), mp: 158 – 159 °C. It was purified by flash column chromatography (petroleum ether/EtOAc =10:1); <sup>1</sup>H NMR (500 MHz, CDCl<sub>3</sub>) δ 7.39 – 7.33 (m, 2H), 7.29 (dd, *J* = 8.6, 6.9 Hz, 2H), 7.24 – 7.19 (m, 1H), 6.99 – 6.93 (m, 1H), 6.80 (m, 1H), 6.73 (dd, *J* = 8.7, 2.6 Hz, 1H), 6.30 (dd, *J* = 17.2, 10.6 Hz, 1H), 5.96 (s, 1H), 5.30 (d, *J* = 10.6 Hz, 1H), 4.98 (d, *J* = 17.2 Hz, 1H), 3.59 (s, 3H), 3.28 (s, 3H), 3.09 (d, *J* = 13.8 Hz, 1H), 3.02 (d, *J* = 13.7 Hz, 1H); <sup>13</sup>C NMR (126 MHz, CDCl<sub>3</sub>) δ 167.6, 166.5, 161.5 (d, *J* = 251.2 Hz), 151.4 (d, *J* = 11.6 Hz), 138.8, 137.5, 127.2, 126.9, 126.5 (d, *J* = 9.2 Hz), 126.2, 117.4, 114.5 (d, *J* = 4.0 Hz), 111.5 (d, *J* = 21.7 Hz), 106.1 (d, *J* = 25.4 Hz), 72.9, 65.6, 62.1, 52.2, 52.1, 44.4; <sup>19</sup>F NMR (471 MHz, CDCl<sub>3</sub>) δ -109.62; HRMS (ESI) calculated for C<sub>22</sub>H<sub>21</sub>FNO<sub>7</sub>S<sup>+</sup> [M + H]<sup>+</sup> 462.1017, found 462.1027.

### *Dimethyl 9-chloro-3-phenyl-3-vinyl-2,3-dihydrobenzo[e] pyrrolo[1,2-c][1,2,3]oxathiazine-1,1(10bH)-dicarboxylate 5,5 - dioxide (3ac).*

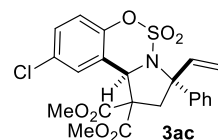

White solid (43.5 mg, 91% yield, >20:1 dr), mp: 156 – 157 °C. It was purified by flash column chromatography (petroleum ether/EtOAc =10:1); <sup>1</sup>H NMR (500 MHz, CDCl<sub>3</sub>) δ 7.45 – 7.39 (m, 2H), 7.39 – 7.34 (m, 2H), 7.32 – 7.27 (m, 2H), 7.05 – 6.98 (m, 2H), 6.35 (dd, *J* = 17.2, 10.6 Hz, 1H), 6.06 (s, 1H), 5.37 (d, *J* = 10.6 Hz, 1H), 5.05 (d, *J* = 17.1 Hz, 1H), 3.73 (s, 3H), 3.32 (s, 3H), 3.12 (q, *J* = 13.8 Hz, 2H); <sup>13</sup>C NMR (126 MHz, CDCl<sub>3</sub>) δ 168.4, 167.3, 150.3, 139.8, 138.5, 130.4, 129.9, 128.2, 127.9, 127.3, 126.3, 121.2, 120.8, 118.5, 73.9, 66.7, 63.2, 53.3, 53.2, 45.3; HRMS (ESI) calculated for C<sub>22</sub>H<sub>21</sub>ClNO<sub>7</sub>S<sup>+</sup> [M + H]<sup>+</sup> 478.0722, found 478.0724.

**Dimethyl 8-bromo-3-phenyl-3-vinyl-2,3-dihydrobenzo[e] pyrrolo[1,2-c][1,2,3]oxathiazine-1,1(10bH)-dicarboxylate 5,5-dioxide (3ad).**

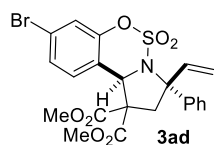

White solid (49.3 mg, 95% yield, >20:1 dr), mp: 160 – 161 °C. It was purified by flash column chromatography (petroleum ether/EtOAc =10:1); <sup>1</sup>H NMR (500 MHz, CDCl<sub>3</sub>) δ 7.45 – 7.40 (m, 2H), 7.36 (dd, *J* = 8.7, 6.8 Hz, 2H), 7.30 – 7.26 (m, 2H), 7.22 (d, *J* = 2.1 Hz, 1H), 6.92 (dd, *J* = 8.5, 1.0 Hz, 1H), 6.36 (dd, *J* = 17.2, 10.6 Hz, 1H), 6.00 (s, 1H), 5.37 (d, *J* = 10.5 Hz, 1H), 5.06 (d, *J* = 17.3 Hz, 1H), 3.66 (s, 3H), 3.35 (s, 3H), 3.15 (d, *J* = 13.8 Hz, 1H), 3.09 (d, *J* = 13.8 Hz, 1H); <sup>13</sup>C NMR (126 MHz, CDCl<sub>3</sub>) δ 168.5, 167.5, 152.0, 139.9, 138.5, 128.3, 128.2, 128.0, 127.3, 127.2, 122.8, 122.6, 118.7, 118.5, 74.0, 66.8, 63.0, 53.3, 53.2, 45.5; HRMS (ESI) calculated for C<sub>22</sub>H<sub>21</sub>BrNO<sub>7</sub>S<sup>+</sup> [M + H]<sup>+</sup> 522.0217, found 522.0223.

**Dimethyl 7-bromo-3-phenyl-3-vinyl-2,3-dihydrobenzo[e] pyrrolo[1,2-c][1,2,3]oxathiazine-1,1(10bH)-dicarboxylate 5,5-dioxide (3ae).**

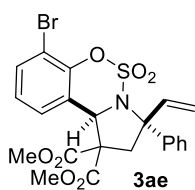

White solid (47.0 mg, 90% yield, >20:1 dr), mp: 142 – 143 °C. It was purified by flash column chromatography (petroleum ether/EtOAc =10:1); <sup>1</sup>H NMR (500 MHz, CDCl<sub>3</sub>) δ 7.51 – 7.46 (m, 1H), 7.38 – 7.33 (m, 2H), 7.29 (dd, *J* = 8.7, 6.9 Hz, 2H), 7.24 – 7.19 (m, 1H), 6.97 – 6.86 (m, 2H), 6.31 (dd, *J* = 17.2, 10.6 Hz, 1H), 5.98 (s, 1H), 5.31 (d, *J* = 10.6 Hz, 1H), 4.97 (d, *J* = 17.2 Hz, 1H), 3.55 (s, 3H), 3.29 (s, 3H), 3.09 (d, *J* = 13.8 Hz, 1H), 3.04 (d, *J* = 13.8 Hz, 1H); <sup>13</sup>C NMR (126 MHz, CDCl<sub>3</sub>) δ 168.7, 167.5, 148.5, 139.7, 138.4, 133.7, 128.3, 128.0, 127.2, 125.5, 125.2, 121.7, 118.5, 113.2, 74.3, 67.1, 63.4, 53.2, 45.6; HRMS (ESI) calculated for C<sub>22</sub>H<sub>21</sub>BrNO<sub>7</sub>S<sup>+</sup> [M + H]<sup>+</sup> 522.0217, found 522.0221.

**Dimethyl 9-methyl-3-phenyl-3-vinyl-2,3-dihydrobenzo[e] pyrrolo[1,2-c][1,2,3]oxathiazine-1,1(10bH)-dicarboxylate 5,5-dioxide (3af).**

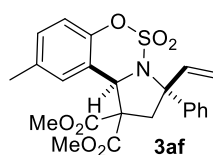

White solid (42.8 mg, 94% yield, >20:1 dr), mp: 154 – 155 °C. It was purified by flash column chromatography (petroleum ether/EtOAc =10:1); <sup>1</sup>H NMR (500 MHz, CDCl<sub>3</sub>) δ 7.47 – 7.40 (m, 2H), 7.35 (m, 2H), 7.29 – 7.24 (m, 1H), 7.12 (dd, *J* = 8.4, 2.1 Hz, 1H), 6.93 (d, *J* = 8.4 Hz, 1H), 6.83 – 6.75 (m, 1H), 6.36 (dd, *J* = 17.2, 10.6 Hz, 1H), 6.08 (s, 1H), 5.35 (d, *J* = 10.6 Hz, 1H), 5.03 (d, *J* = 17.2 Hz, 1H), 3.68 (s, 3H), 3.28 (s, 3H), 3.14 (d, *J* = 13.7 Hz, 1H), 3.08 (d, *J* = 13.7 Hz, 1H), 2.28 (s, 3H); <sup>13</sup>C NMR (126 MHz, CDCl<sub>3</sub>) δ 168.6, 167.6, 149.7, 140.1, 138.9, 134.7, 130.5, 128.1, 127.7, 127.4, 126.4, 119.2, 119.0, 118.3, 73.6, 67.0, 63.2, 53.01, 52.99, 45.3, 21.0; HRMS (ESI) calculated for C<sub>23</sub>H<sub>24</sub>NO<sub>7</sub>S<sup>+</sup> [M + H]<sup>+</sup> 458.1268, found 458.1272.

**Dimethyl 8-methyl-3-phenyl-3-vinyl-2,3-dihydrobenzo[e] pyrrolo[1,2-c][1,2,3]oxathiazine-1,1(10bH)-dicarboxylate 5,5-dioxide (3ag).**

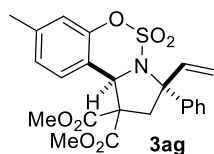

White solid (40.9 mg, 89% yield, >20:1 dr), mp: 164 – 165 °C. It was purified by flash column chromatography (petroleum ether/EtOAc =8:1); <sup>1</sup>H NMR (500 MHz, CDCl<sub>3</sub>) δ 7.39 – 7.33 (m, 2H), 7.28 (dd, *J* = 8.6, 7.0 Hz, 2H), 7.23 – 7.18 (m, 1H), 6.87 (dd, *J* = 8.2, 1.8 Hz, 1H), 6.84 – 6.72 (m, 2H), 6.29 (dd, *J* = 17.2, 10.6 Hz, 1H), 5.99 (s, 1H), 5.27 (d, *J* = 10.7 Hz, 1H), 4.96 (d, *J* = 17.2 Hz, 1H), 3.60 (s, 3H), 3.21 (s, 3H), 3.07 (d, *J* = 13.7 Hz, 1H), 3.00 (d, *J* = 13.7 Hz, 1H), 2.26 (s, 3H); <sup>13</sup>C NMR (126 MHz, CDCl<sub>3</sub>) δ 167.6, 166.6, 150.5, 139.5, 139.1, 137.8, 127.0, 126.7, 126.4, 125.0, 124.6, 118.7, 117.2, 115.2, 72.6, 65.9, 62.0, 52.1, 52.0, 44.2, 19.9; HRMS (ESI) calculated for C<sub>23</sub>H<sub>24</sub>NO<sub>7</sub>S<sup>+</sup> [M + H]<sup>+</sup> 458.1268, found 458.1272.

**Dimethyl 7-methyl-3-phenyl-3-vinyl-2,3-dihydrobenzo[e] pyrrolo[1,2-c][1,2,3]oxathiazine-1,1(10bH)-dicarboxylate 5,5-dioxide (3ah).**

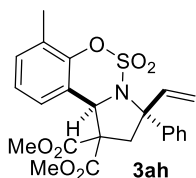

White solid (41.2 mg, 90% yield, >20:1 dr), mp: 145 – 146 °C. It was purified by flash column chromatography (petroleum ether/EtOAc =8:1); <sup>1</sup>H NMR (500 MHz, CDCl<sub>3</sub>) δ 7.47 – 7.42 (m, 2H), 7.36 (dd, *J* = 8.6, 7.0 Hz, 2H), 7.31 – 7.26 (m, 1H), 7.19 – 7.15 (m, 1H), 7.02 (t, *J* = 7.7 Hz, 1H), 6.86 (d, *J* = 7.9 Hz, 1H), 6.40 (dd, *J* = 17.2, 10.6 Hz, 1H), 6.06 (s, 1H), 5.35 (d, *J* = 10.6 Hz, 1H), 5.03 (d, *J* = 17.2 Hz, 1H), 3.62 (s, 3H), 3.34 (s, 3H), 3.16 (d, *J* = 13.7 Hz, 1H), 3.10 (d, *J* = 13.7 Hz, 1H), 2.28 (s, 3H); <sup>13</sup>C NMR (126 MHz, CDCl<sub>3</sub>) δ 168.9, 167.8, 150.1, 140.0, 138.9, 131.3, 128.7, 128.2, 127.8, 127.4, 124.4, 123.5, 119.3, 118.1, 73.9, 67.1, 63.4, 53.1, 53.0, 45.5, 15.7; HRMS (ESI) calculated for C<sub>23</sub>H<sub>24</sub>NO<sub>7</sub>S<sup>+</sup> [M + H]<sup>+</sup> 458.1268, found 458.1264.

**Dimethyl 9-(tert-butyl)-3-phenyl-3-vinyl-2,3-dihydrobenzo [e]pyrrolo[1,2-c][1,2,3]oxathiazine-1,1(10-bH)-dicarboxylate 5,5-dioxide (3ai).**

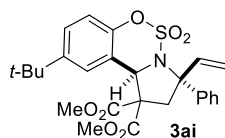

White solid (45.7 mg, 92% yield, >20:1 dr), mp: 163– 164 °C. It was purified by flash column chromatography (petroleum ether/EtOAc =10:1); <sup>1</sup>H NMR (500 MHz, CDCl<sub>3</sub>) δ 7.47 – 7.42 (m, 2H), 7.39 – 7.31 (m, 3H), 7.29 – 7.26 (m, 1H), 7.10 – 7.07 (m, 1H), 6.97 (d, *J* = 8.6 Hz, 1H), 6.38 (dd, *J* = 17.2, 10.6 Hz, 1H), 6.07 (s, 1H), 5.35 (d, *J* = 10.6 Hz, 1H), 5.03 (d, *J* = 17.2 Hz, 1H), 3.67 (s, 3H), 3.32 (s, 3H), 3.15 (d, *J* = 13.7 Hz, 1H), 3.10 (d, *J* = 13.7 Hz, 1H), 1.27 (s, 9H); <sup>13</sup>C NMR (126 MHz, CDCl<sub>3</sub>) δ 168.8, 167.7, 149.3, 148.1, 140.1, 138.9, 128.1, 127.7, 127.4, 127.0, 123.0, 118.8, 118.5, 118.3, 73.6, 67.1, 63.1, 53.3, 53.0, 45.5, 34.6, 31.3; HRMS (ESI) calculated for C<sub>26</sub>H<sub>30</sub>NO<sub>7</sub>S<sup>+</sup> [M + H]<sup>+</sup> 500.1737, found 500.1732.

**Dimethyl 8-(tert-butyl)-3-phenyl-3-vinyl-2,3-dihydrobenzo [e]pyrrolo[1,2-c][1,2,3]oxathiazine-1,1(10-bH)-dicarboxylate 5,5-dioxide (3aj).**

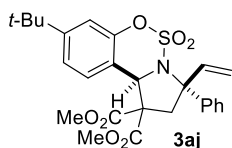

White solid (46.2 mg, 93% yield, >20:1 dr), mp: 134 – 135 °C. It was purified by flash column chromatography (petroleum ether/EtOAc=15:1); <sup>1</sup>H NMR (500 MHz, CDCl<sub>3</sub>) δ 7.39 – 7.34 (m, 2H), 7.28 (t, *J* = 7.7 Hz, 2H), 7.22 – 7.19 (m, 1H), 7.08 (dd, *J* = 8.4, 2.0 Hz, 1H), 6.96 (d, *J* = 2.0 Hz, 1H), 6.83 (d, *J* = 8.4 Hz, 1H), 6.29 (dd, *J* = 17.2, 10.6 Hz, 1H), 6.01 (s, 1H), 5.28 (d, *J* = 10.6 Hz, 1H), 4.96 (d, *J* = 17.2 Hz, 1H), 3.61 (s, 3H), 3.20 (s, 3H), 3.07 (d, *J* = 13.7 Hz, 1H), 3.01 (d, *J* = 13.7 Hz, 1H), 1.22 (s, 9H); <sup>13</sup>C NMR (126 MHz, CDCl<sub>3</sub>) δ 168.6, 167.6, 153.9, 151.6, 140.1, 138.9, 128.0, 127.7, 127.5, 125.4, 122.4, 118.4, 116.4, 116.1, 73.6, 66.8, 63.0, 53.1, 53.0, 45.3, 34.8, 31.0; HRMS (ESI) calculated for C<sub>26</sub>H<sub>30</sub>NO<sub>7</sub>S<sup>+</sup> [M + H]<sup>+</sup> 500.1737, found 500.1735.

**Dimethyl 7-(tert-butyl)-3-phenyl-3-vinyl-2,3-dihydrobenzo [e]pyrrolo[1,2-c][1,2,3]oxathiazine-1,1(10-bH)-dicarboxylate 5,5-dioxide (3ak).**

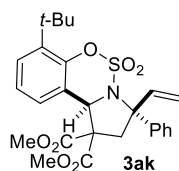

White solid (46.5 mg, 93% yield, >20:1 dr), mp: 154 – 155 °C. It was purified by flash column chromatography (petroleum ether/EtOAc =10:1); <sup>1</sup>H NMR (500 MHz, CDCl<sub>3</sub>) δ 7.39 – 7.35 (m, 2H), 7.29 (dd, *J* = 8.6, 7.0 Hz, 2H), 7.25 (dd, *J* = 7.9, 1.6 Hz, 1H), 7.23 – 7.18 (m, 1H), 6.98 (t, *J* = 7.9 Hz, 1H), 6.85 (dt, *J* = 7.8, 1.2 Hz, 1H), 6.35 (dd, *J* = 17.3, 10.6 Hz, 1H), 5.95 (s, 1H), 5.26 (d, *J* = 10.6 Hz, 1H), 4.96 (d, *J* = 17.2 Hz, 1H), 3.50 (s, 3H), 3.27 (s, 3H), 3.13 (d, *J* = 13.6 Hz, 1H), 3.02 (d, *J* = 13.7 Hz, 1H), 1.33 (s, 9H); <sup>13</sup>C NMR (126 MHz, CDCl<sub>3</sub>) δ 169.0, 167.9, 150.8, 140.4, 140.2, 138.8, 128.2, 127.8, 127.3, 127.3, 124.4, 124.3, 120.1, 117.8, 74.0, 67.2, 63.8, 53.0, 45.3, 35.0, 30.0; HRMS (ESI) calculated for C<sub>26</sub>H<sub>30</sub>NO<sub>7</sub>S<sup>+</sup> [M + H]<sup>+</sup> 500.1737, found 500.1741.

**Dimethyl 8-methoxy-3-phenyl-3-vinyl-2,3-dihydrobenzo [e]pyrrolo[1,2-c][1,2,3]oxathiazine-1,1(10-bH)-dicarboxylate 5,5-dioxide (3al).**

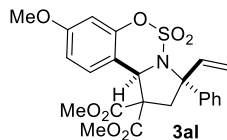

White solid (41.3 mg, 87% yield, >20:1 dr), mp: 194 – 195 °C. It was purified by flash column chromatography (petroleum ether/EtOAc=8:1); <sup>1</sup>H NMR (500 MHz, CDCl<sub>3</sub>) δ 7.35 (d, *J* = 7.4 Hz, 2H), 7.28 (t, *J* = 7.6 Hz, 2H), 7.19 (t, *J* = 3.7 Hz, 1H), 6.83 (d, *J* = 8.8 Hz, 1H), 6.62 (dd, *J* = 8.8, 2.7 Hz, 1H), 6.49 (d, *J* = 2.6 Hz, 1H), 6.30 (dd, *J* = 17.2, 10.6 Hz, 1H), 5.97 (s, 1H), 5.28 (d, *J* = 10.7 Hz, 1H), 4.97 (d, *J* = 17.2 Hz, 1H), 3.72 (s, 3H), 3.61 (s, 3H), 3.22 (s, 3H), 3.08 (d, *J* = 13.7 Hz, 1H), 2.99 (d, *J* = 13.7 Hz, 1H); <sup>13</sup>C NMR (126 MHz, CDCl<sub>3</sub>) δ 168.6, 167.7, 160.5, 152.6, 140.1, 138.9, 128.1, 127.7, 127.4, 126.7, 118.3, 111.9, 111.0, 104.2, 73.6, 66.7, 63.0, 55.6, 53.2, 53.0, 45.2; HRMS (ESI) calculated for C<sub>23</sub>H<sub>24</sub>NO<sub>8</sub>S<sup>+</sup> [M + H]<sup>+</sup> 474.1217, found 474.1221.

**Dimethyl 7-ethoxy-3-phenyl-3-vinyl-2,3-dihydrobenzo[e] pyrrolo[1,2-c][1,2,3]oxathiazine-1,1(10bH)-dicarboxylate 5,5-dioxide (3am).**

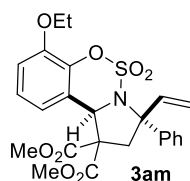

White solid (44.5 mg, 91% yield, >20:1 dr), mp: 146 – 147 °C. It was purified by flash column chromatography (petroleum ether/EtOAc =8:1); <sup>1</sup>H NMR (500 MHz, CDCl<sub>3</sub>) δ 7.42 – 7.28 (m, 2H), 7.28 (dd, *J* = 8.6, 7.0 Hz, 2H), 7.19 (d, *J* = 7.0 Hz, 1H), 6.96 (t, *J* = 8.1 Hz, 1H), 6.82 (dd, *J* = 8.3, 1.5 Hz, 1H), 6.50 (dt, *J* = 8.1, 1.2 Hz, 1H), 6.33 (dd, *J* = 17.2, 10.6 Hz, 1H), 6.00 (s, 1H), 5.28 (d, *J* = 10.7 Hz, 1H), 4.95 (d, *J* = 17.2 Hz, 1H), 4.00 (m, 2H), 3.56 (s, 3H), 3.24 (s, 3H), 3.06 (q, *J* = 13.7 Hz, 2H), 1.36 (t, *J* = 7.0 Hz, 3H); <sup>13</sup>C NMR (126 MHz, CDCl<sub>3</sub>) δ 168.8, 167.7, 148.8, 141.7, 139.9, 138.9, 128.1, 127.8, 127.4, 124.7, 120.6, 118.2, 117.0, 113.6, 73.9, 67.1, 65.0, 63.3, 53.1, 53.0, 45.6, 14.7; HRMS (ESI) calculated for C<sub>24</sub>H<sub>26</sub>NO<sub>8</sub>S<sup>+</sup> [M + H]<sup>+</sup> 488.1374, found 488.1377.

**Dimethyl 3-(4-fluorophenyl)-3-vinyl-2,3-dihydrobenzo[e] pyrrolo[1,2-c][1,2,3]oxathiazine-1,1(10bH)-dicarboxylate 5,5-dioxide (3ba).**

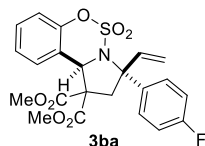

Pale yellow solid (42.9 mg, 93% yield, >20:1 dr), mp: 136 – 137 °C. It was purified by flash column chromatography (petroleum ether/EtOAc =10:1); <sup>1</sup>H NMR (500 MHz, CDCl<sub>3</sub>) δ 7.45 – 7.40 (m, 2H), 7.34 (tt, *J* = 8.2, 1.3 Hz, 1H), 7.15 (td, *J* = 7.6, 1.3 Hz, 1H), 7.09 – 7.00 (m, 4H), 6.36 (dd, *J* = 17.2, 10.6 Hz, 1H), 6.08 (s, 1H), 5.37 (d, *J* = 10.7 Hz, 1H), 5.03 (d, *J* = 17.2 Hz, 1H), 3.66 (s, 3H), 3.40 (s, 3H), 3.15 (d, *J* = 13.8 Hz, 1H), 3.04 (d, *J* = 13.8 Hz, 1H); <sup>13</sup>C NMR (126 MHz, CDCl<sub>3</sub>) δ 168.7, 167.5, 162.2 (d, *J* = 247.5 Hz), 151.6, 138.7, 135.9 (d, *J* = 3.1 Hz), 130.0, 129.3 (d, *J* = 8.3 Hz), 126.0, 125.2, 119.5, 119.4, 118.5, 115.0 (d, *J* = 21.5 Hz), 73.2, 67.0, 63.1, 53.2, 45.6; <sup>19</sup>F NMR (471 MHz, CDCl<sub>3</sub>) δ -114.61; HRMS (ESI) calculated for C<sub>22</sub>H<sub>21</sub>FNO<sub>7</sub>S<sup>+</sup> [M + H]<sup>+</sup> 462.1017, found 462.1018.

**Dimethyl 3-(3-chlorophenyl)-3-vinyl-2,3-dihydrobenzo[e] pyrrolo[1,2-c][1,2,3]oxathiazine-1,1(10bH)-dicarboxylate 5,5-dioxide (3ca).**

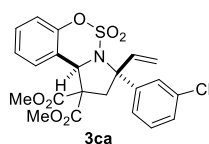

Pale yellow solid (44.5 mg, 93% yield, >20:1 dr), mp: 130 – 131 °C. It was purified by flash column chromatography (petroleum ether/EtOAc =10:1); <sup>1</sup>H NMR (500 MHz, CDCl<sub>3</sub>) δ 7.38 (dt, *J* = 3.5, 1.9 Hz, 2H), 7.37 – 7.26 (m, 3H), 7.15 (td, *J* = 7.7, 1.3 Hz, 1H), 7.08 – 6.99 (m, 2H), 6.37 (dd, *J* = 17.2, 10.7 Hz, 1H), 6.08 (s, 1H), 5.39 (d, *J* = 10.7 Hz, 1H), 5.06 (d, *J* = 17.2 Hz, 1H), 3.67 (s, 3H), 3.43 (s, 3H), 3.17 (d, *J* = 13.8 Hz, 1H), 3.03 (d, *J* = 13.8 Hz, 1H); <sup>13</sup>C NMR (126 MHz, CDCl<sub>3</sub>) δ 168.6, 167.4, 151.6, 142.6, 138.1, 134.1, 130.0, 129.6, 128.0, 127.4, 126.0, 125.6, 125.2, 119.5, 119.3, 118.8, 73.2, 67.1, 63.1, 53.2, 45.2; HRMS (ESI) calculated for C<sub>22</sub>H<sub>21</sub>ClNO<sub>7</sub>S<sup>+</sup> [M + H]<sup>+</sup> 478.0722, found 478.0724.



**Dimethyl 3-(4-chlorophenyl)-3-vinyl-2,3-dihydrobenzo[e] pyrrolo[1,2-c][1,2,3]oxathiazine-1,1(10bH)-dicarboxylate 5,5-dioxide (3da).**

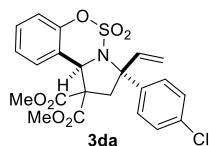

White solid (44.0 mg, 92% yield, >20:1 dr), mp: 138 – 139 °C. It was purified by flash column chromatography (petroleum ether/EtOAc =10:1); <sup>1</sup>H NMR (500 MHz, CDCl<sub>3</sub>) δ 7.33 – 7.23 (m, 5H), 7.08 (td, *J* = 7.7, 1.3 Hz, 1H), 7.00 – 6.91 (m, 2H), 6.28 (dd, *J* = 17.2, 10.6 Hz, 1H), 6.01 (s, 1H), 5.30 (d, *J* = 10.6 Hz, 1H), 4.96 (d, *J* = 17.2 Hz, 1H), 3.59 (s, 3H), 3.32 (s, 3H), 3.08 (d, *J* = 13.8 Hz, 1H), 2.95 (d, *J* = 13.8 Hz, 1H); <sup>13</sup>C NMR (126 MHz, CDCl<sub>3</sub>) δ 168.6, 167.4, 151.6, 138.9, 138.4, 133.8, 130.0, 128.9, 128.3, 126.0, 125.2, 119.5, 119.3, 118.6, 73.2, 67.0, 63.0, 53.2, 45.4; HRMS (ESI) calculated for C<sub>22</sub>H<sub>21</sub>ClNO<sub>7</sub>S<sup>+</sup> [M + H]<sup>+</sup> 478.0722, found 478.0728.

**Dimethyl 3-(2-bromophenyl)-3-vinyl-2,3-dihydrobenzo[e] pyrrolo[1,2-c][1,2,3]oxathiazine-1,1(10bH)-dicarboxylate 5,5-dioxide (3ea).**

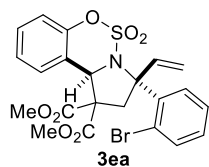

White solid (46.6 mg, 89% yield, >20:1 dr), mp: 140 – 141 °C. It was purified by flash column chromatography (petroleum ether/EtOAc =8:1); <sup>1</sup>H NMR (500 MHz, CDCl<sub>3</sub>) δ 7.65 – 7.56 (m, 2H), 7.54 – 7.47 (m, 2H), 7.31 – 7.25 (m, 1H), 7.10 (td, *J* = 7.7, 1.3 Hz, 1H), 6.99 (dd, *J* = 8.2, 1.3 Hz, 1H), 6.93 (dt, *J* = 8.0, 1.2 Hz, 1H), 6.28 (dd, *J* = 17.3, 10.6 Hz, 1H), 6.05 (s, 1H), 5.35 (d, *J* = 10.7 Hz, 1H), 4.99 (d, *J* = 17.2 Hz, 1H), 3.64 (s, 3H), 3.28 (s, 3H), 3.14 (d, *J* = 14.0 Hz, 1H), 2.93 (d, *J* = 13.9 Hz, 1H); <sup>13</sup>C NMR (126 MHz, CDCl<sub>3</sub>) δ 168.6, 167.4, 151.6, 142.9, 138.1, 131.0, 130.3, 130.0, 129.9, 126.1, 126.0, 125.2, 122.2, 119.5, 119.3, 118.8, 73.1, 67.1, 63.1, 53.3, 53.2, 45.2; HRMS (ESI) calculated for C<sub>22</sub>H<sub>21</sub>BrNO<sub>7</sub>S<sup>+</sup> [M + H]<sup>+</sup> 522.0217, found 522.0220.

**Dimethyl 3-(3-bromophenyl)-3-vinyl-2,3-dihydrobenzo[e] pyrrolo[1,2-c][1,2,3]oxathiazine-1,1(10bH)-dicarboxylate 5,5-dioxide (3fa).**

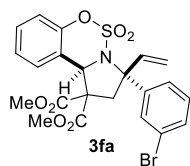

White solid (45.4 mg, 87% yield, >20:1 dr), mp: 135 – 136 °C. It was purified by flash column chromatography (petroleum ether/EtOAc =10:1); <sup>1</sup>H NMR (500 MHz, CDCl<sub>3</sub>) δ 7.45 (t, *J* = 1.9 Hz, 1H), 7.36 (tdd, *J* = 6.7, 2.0, 1.0 Hz, 2H), 7.26 (ddt, *J* = 8.1, 7.0, 1.3 Hz, 1H), 7.19 – 7.15 (m, 1H), 7.08 (td, *J* = 7.6, 1.3 Hz, 1H), 7.01 – 6.92 (m, 2H), 6.29 (dd, *J* = 17.2, 10.7 Hz, 1H), 6.00 (s, 1H), 5.32 (d, *J* = 10.7 Hz, 1H), 4.99 (d, *J* = 17.2 Hz, 1H), 3.59 (s, 3H), 3.36 (s, 3H), 3.09 (d, *J* = 13.9 Hz, 1H), 2.96 (d, *J* = 13.8 Hz, 1H); <sup>13</sup>C NMR (126 MHz, CDCl<sub>3</sub>) δ 168.6, 167.4, 151.6, 142.9, 138.1, 131.0, 130.3, 130.0, 129.9, 126.1, 126.0, 125.2, 122.2, 119.5, 119.3, 118.8, 73.1, 67.1, 63.1, 53.3, 53.2, 45.2; HRMS (ESI) calculated for C<sub>22</sub>H<sub>21</sub>BrNO<sub>7</sub>S<sup>+</sup> [M + H]<sup>+</sup> 522.0217, found 522.0216.

**Dimethyl 3-(4-bromophenyl)-3-vinyl-2,3-dihydrobenzo[e] pyrrolo[1,2-c][1,2,3]oxathiazine-1,1(10bH) -dicarboxylate 5,5 -dioxide (3ga).**

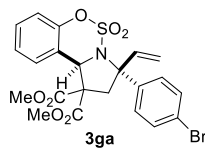

White solid (47.4 mg, 91% yield, >20:1 dr), mp: 130 – 131 °C. It was purified by flash column chromatography (petroleum ether/EtOAc =10:1); <sup>1</sup>H NMR (500 MHz, CDCl<sub>3</sub>) δ 7.52 – 7.47 (m, 2H), 7.36 – 7.30 (m, 3H), 7.15 (td, *J* = 7.7, 1.3 Hz, 1H), 7.07 – 6.99 (m, 2H), 6.35 (dd, *J* = 17.2, 10.6 Hz, 1H), 6.08 (s, 1H), 5.37 (d, *J* = 10.6 Hz, 1H), 5.04 (d, *J* = 17.2 Hz, 1H), 3.67 (s, 3H), 3.39 (s, 3H), 3.15 (d, *J* = 13.8 Hz, 1H), 3.02 (d, *J* = 13.8 Hz, 1H); <sup>13</sup>C NMR (126 MHz, CDCl<sub>3</sub>) δ 168.6, 167.4, 151.6, 139.4, 138.3, 131.3, 130.0, 129.2, 126.0, 125.2, 122.0, 119.5, 119.3, 118.7, 73.2, 67.0, 63.0, 53.0, 45.4; HRMS (ESI) calculated for C<sub>22</sub>H<sub>21</sub>BrNO<sub>7</sub>S<sup>+</sup> [M + H]<sup>+</sup> 522.0217, found 522.0220.

**Dimethyl 3-(p-tolyl)-3-vinyl-2,3-dihydrobenzo[e]pyrrolo[1, 2-c][1,2,3]oxathiazine-1,1(10bH)-dicarboxylate 5,5-dioxide (3ha).**

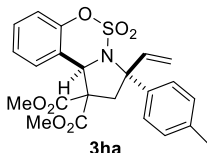

White solid (40.7 mg, 89% yield, >20:1 dr), mp: 124 – 125 °C. It was purified by flash column chromatography (petroleum ether/EtOAc =10:1); <sup>1</sup>H NMR (500 MHz, CDCl<sub>3</sub>) δ 7.35 – 7.29 (m, 3H), 7.19 – 7.11 (m, 3H), 7.08 – 7.02 (m, 2H), 6.38 (dd, *J* = 17.2, 10.6 Hz, 1H), 6.03 (s, 1H), 5.34 (d, *J* = 10.6 Hz, 1H), 5.03 (d, *J* = 17.2 Hz, 1H), 3.62 (s, 3H), 3.40 (s, 3H), 3.14 (d, *J* = 13.7 Hz, 1H), 3.09 (d, *J* = 13.7 Hz, 1H), 2.33 (s, 3H); <sup>13</sup>C NMR (126 MHz, CDCl<sub>3</sub>) δ 168.9, 167.8, 151.5, 139.0, 137.6, 136.9, 129.8, 128.9, 127.3, 126.1, 125.1, 119.7, 119.4, 118.0, 73.8, 66.9, 63.2, 53.13, 53.06, 45.6, 21.0; HRMS (ESI) calculated for C<sub>23</sub>H<sub>24</sub>NO<sub>7</sub>S<sup>+</sup> [M + H]<sup>+</sup> 458.1268, found 458.1272.

**Dimethyl 3-(2-methoxyphenyl)-3-vinyl-2,3-dihydrobenzo[e] pyrrolo[1,2-c][1,2,3]oxathiazine-1,1(10b H)-dicarboxylate 5,5 -dioxide (3ia).**

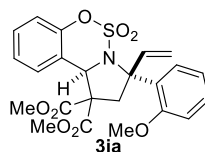

White solid (40.7 mg, 86% yield, >20:1 dr), mp: 135 – 136 °C. It was purified by flash column chromatography (petroleum ether/EtOAc =10:1); <sup>1</sup>H NMR (500 MHz, CDCl<sub>3</sub>) δ 7.57 (dd, *J* = 7.9, 1.7 Hz, 1H), 7.31 (td, *J* = 7.8, 1.6 Hz, 2H), 7.14 (td, *J* = 7.6, 1.3 Hz, 1H), 7.09 (dt, *J* = 8.0, 1.3 Hz, 1H), 7.04 (dd, *J* = 8.3, 1.3 Hz, 1H), 6.99 (td, *J* = 7.6, 1.2 Hz, 1H), 6.93 (dd, *J* = 8.2, 1.2 Hz, 1H), 6.23 (dd, *J* = 17.2, 10.6 Hz, 1H), 6.14 (s, 1H), 5.36 (d, *J* = 10.6 Hz, 1H), 5.14 (d, *J* = 17.2 Hz, 1H), 3.82 (s, 3H), 3.57 (d, *J* = 13.8 Hz, 4H), 3.50 (s, 3H), 2.98 (d, *J* = 13.8 Hz, 1H); <sup>13</sup>C NMR (126 MHz, CDCl<sub>3</sub>) δ 169.4, 168.2, 156.6, 151.3, 137.5, 129.8, 129.7, 129.5, 128.3, 126.0, 124.9, 120.6, 120.5, 119.2, 117.1, 111.6, 72.6, 67.2, 63.2, 55.2, 53.1, 52.8, 43.9; HRMS (ESI) calculated for C<sub>23</sub>H<sub>24</sub>NO<sub>8</sub>S<sup>+</sup> [M + H]<sup>+</sup> 474.1217, found 474.1218.

**Dimethyl 3-(4-cyanophenyl)-3-vinyl-2,3-dihydrobenzo[e] pyrrolo[1,2-c][1,2,3]oxathiazine-1,1(10bH)-dicarboxylate 5,5-dioxide (3ja).**

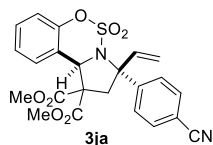

White solid (43.1 mg, 92% yield, >20:1 dr), mp: 162 – 163 °C. It was purified by flash column chromatography (petroleum ether/EtOAc =5:1); <sup>1</sup>H NMR (500 MHz, CDCl<sub>3</sub>) δ 7.45 (d, *J* = 2.0 Hz, 1H), 7.36 (m, 2H), 7.26 (td, *J* = 8.0, 1.6 Hz, 1H), 7.21 – 7.17 (m, 1H), 7.08 (td, *J* = 7.7, 1.3 Hz, 1H), 7.00 – 6.93 (m, 2H), 6.29 (dd, *J* = 17.2, 10.7 Hz, 1H), 6.00 (s, 1H), 5.32 (d, *J* = 10.6 Hz, 1H), 4.99 (d, *J* = 17.2 Hz, 1H), 3.59 (s, 3H), 3.36 (s, 3H), 3.09 (d, *J* = 13.9 Hz, 1H), 2.95 (d, *J* = 13.8 Hz, 1H); <sup>13</sup>C NMR (126 MHz, CDCl<sub>3</sub>) δ 168.3, 167.1, 151.6, 146.2, 137.6, 131.9, 130.2, 128.2, 125.9, 125.4, 119.6, 119.3, 119.0, 118.4, 111.8, 73.0, 67.2, 62.9, 53.3, 53.2, 45.1; HRMS (ESI) calculated for C<sub>23</sub>H<sub>21</sub>N<sub>2</sub>O<sub>7</sub>S<sup>+</sup> [M + H]<sup>+</sup> 469.1064, found 469.1068.

**Dimethyl 3-([1,1'-biphenyl]-4-yl)-3-vinyl-2,3-dihydrobenzo [e]pyrrolo[1,2-c][1,2,3]oxathiazine-1,1(10 bH)-dicarboxylate 5,5-dioxide (3ka).**

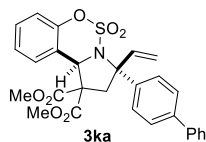

White solid (47.9 mg, 92% yield, >20:1 dr), mp: 146 – 147 °C. It was purified by flash column chromatography (petroleum ether/EtOAc =10:1); <sup>1</sup>H NMR (500 MHz, CDCl<sub>3</sub>) δ 7.59 (td, *J* = 6.3, 3.0 Hz, 4H), 7.54 – 7.49 (m, 2H), 7.44 (t, *J* = 7.7 Hz, 2H), 7.38 – 7.30 (m, 2H), 7.14 (td, *J* = 7.7, 1.3 Hz, 1H), 7.05 (tt, *J* = 6.7, 1.3 Hz, 2H), 6.42 (dd, *J* = 17.2, 10.6 Hz, 1H), 6.12 (s, 1H), 5.39 (d, *J* = 10.6 Hz, 1H), 5.10 (d, *J* = 17.2 Hz, 1H), 3.65 (s, 3H), 3.35 (s, 3H), 3.15 (q, *J* = 13.8 Hz, 2H); <sup>13</sup>C NMR (126 MHz, CDCl<sub>3</sub>) δ 168.7, 167.6, 151.7, 140.6, 140.3, 139.1, 138.7, 129.9, 128.9, 127.9, 127.6, 127.1, 126.8, 126.1, 125.2, 119.6, 119.5, 118.4, 73.7, 67.1, 63.2, 53.2, 53.1, 45.5; HRMS (ESI) calculated for C<sub>28</sub>H<sub>26</sub>NO<sub>7</sub>S<sup>+</sup> [M + H]<sup>+</sup> 520.1424, found 520.1419.

**Dimethyl 3-(thiophen-2-yl)-3-vinyl-2,3-dihydrobenzo[e]pyrrolo[1,2-c][1,2,3]oxathiazine-1,1(10bH)-dicarboxylate 5,5-dioxide (3la).**

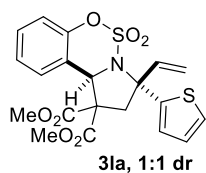

White solid (37.9 mg, 84% yield, 1:1 dr), mp: 121 – 122 °C. It was purified by flash column chromatography (petroleum ether/EtOAc =10:1); <sup>1</sup>H NMR (500 MHz, CDCl<sub>3</sub>) δ 7.30 (td, *J* = 6.1, 5.1, 1.3 Hz, 2H), 7.19 (dd, *J* = 8.4, 1.6 Hz, 1H), 7.07 – 6.97 (m, 4H), 6.48 (dd, *J* = 17.1, 10.5 Hz, 1H), 5.92 (s, 1H), 5.30 (d, *J* = 10.7 Hz, 1H), 5.16 (d, *J* = 17.1 Hz, 1H), 3.82 (s, 3H), 3.54 (s, 3H), 3.42 (d, *J* = 13.6 Hz, 1H), 3.33 (d, *J* = 13.6 Hz, 1H); <sup>13</sup>C NMR (126 MHz, CDCl<sub>3</sub>) δ 169.4, 168.1, 165.7, 165.7, 151.0, 144.0, 143.0, 139.2, 138.2, 129.8, 127.6, 127.1, 126.97, 126.94, 126.6, 125.94, 125.92, 125.1, 119.8, 119.1, 117.9, 116.4, 84.8, 70.9, 66.5, 63.3, 63.0, 54.01, 53.98, 53.5, 53.0, 48.0, 43.8; HRMS (ESI) calculated for C<sub>20</sub>H<sub>20</sub>NO<sub>7</sub>S<sub>2</sub><sup>+</sup> [M + H]<sup>+</sup> 450.0676, found 450.0672.

**Dimethyl 3-(naphthalen-2-yl)-3-vinyl-2,3-dihydrobenzo[e] pyrrolo[1,2-c][1,2,3]oxathiazine-1,1(10bH) -dicarboxylate 5,5 -dioxide (3ma).**

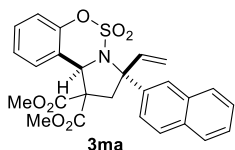

White solid (44.9 mg, 91% yield, >20:1 dr), mp: 167 – 168 °C. It was purified by flash column chromatography (petroleum ether/EtOAc =10:1); <sup>1</sup>H NMR (500 MHz, CDCl<sub>3</sub>) δ 7.97 (d, *J* = 2.3 Hz, 1H), 7.91 – 7.78 (m, 3H), 7.52 – 7.42 (m, 3H), 7.33 (td, *J* = 8.1, 1.6 Hz, 1H), 7.14 (td, *J* = 7.6, 1.3 Hz, 1H), 7.06 (m, 2H), 6.45 (dd, *J* = 17.3, 10.6 Hz, 1H), 6.14 (s, 1H), 5.41 (d, *J* = 10.5 Hz, 1H), 5.09 (d, *J* = 17.3 Hz, 1H), 3.64 (s, 3H), 3.19 (m, 5H); <sup>13</sup>C NMR (126 MHz, CDCl<sub>3</sub>) δ 168.7, 167.7, 151.7, 138.6, 137.3, 132.8, 132.6, 129.9, 128.5, 128.0, 127.4, 126.61, 126.56, 126.5, 126.1, 125.2, 125.1, 119.6, 119.5, 118.7, 73.9, 67.2, 63.2, 53.2, 53.1, 45.1; HRMS (ESI) calculated for C<sub>26</sub>H<sub>24</sub>NO<sub>7</sub>S<sup>+</sup> [M + H]<sup>+</sup> 494.1268, found 494.1265.

**Dimethyl 3-ethyl-3-vinyl-2,3-dihydrobenzo[e]pyrrolo[1,2-c][1,2,3]oxathiazine-1,1(10bH)-dicarboxylate 5,5-dioxide (3na).**

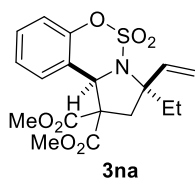

White solid (34.0 mg, 86% yield, >20:1 dr), mp: 103 – 104 °C. It was purified by flash column chromatography (petroleum ether/EtOAc =10:1); <sup>1</sup>H NMR (500 MHz, CDCl<sub>3</sub>) δ 7.33 – 7.27 (m, 1H), 7.21 (dd, *J* = 7.9, 1.6 Hz, 1H), 7.16 – 7.10 (m, 1H), 7.01 (dd, *J* = 8.2, 1.2 Hz, 1H), 6.29 (dd, *J* = 17.5, 11.0 Hz, 1H), 5.69 (s, 1H), 5.24 – 5.13 (m, 2H), 3.91 (s, 3H), 3.44 (s, 3H), 2.86 (d, *J* = 13.8 Hz, 1H), 2.65 (d, *J* = 13.8 Hz, 1H), 2.12 – 1.98 (m, 2H), 1.03 (t, *J* = 7.4 Hz, 3H); <sup>13</sup>C NMR (126 MHz, CDCl<sub>3</sub>) δ 170.1, 168.2, 150.6, 139.3, 129.4, 126.6, 124.9, 120.4, 118.7, 114.7, 71.6, 66.9, 62.4, 53.7, 52.6, 42.9, 31.4, 8.7; HRMS (ESI) calculated for C<sub>18</sub>H<sub>22</sub>NO<sub>7</sub>S<sup>+</sup> [M + H]<sup>+</sup> 396.1111, found 396.1115.

**1,1-bis(hydroxymethyl)-3-phenyl-3-vinyl-1,2,3,10b-tetrahydrobenzo[e]pyrrolo[1,2-c][1,2,3]oxathiazine 5,5-dioxide (4aa).**

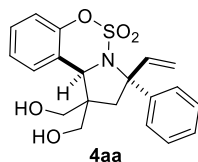

Pale yellow oil (22.2 mg, 57% yield, >20:1 dr). It was purified by flash column chromatography (petroleum ether/EtOAc =2:1); <sup>1</sup>H NMR (500 MHz, CDCl<sub>3</sub>) δ 7.47 – 7.39 (m, 3H), 7.33 – 7.19 (m, 4H), 7.13 – 7.07 (m, 1H), 6.94 (d, *J* = 8.2 Hz, 1H), 6.56 (dd, *J* = 17.4, 11.0 Hz, 1H), 5.41 – 5.30 (m, 3H), 3.87 (d, *J* = 10.7 Hz, 1H), 3.71 (d, *J* = 10.8 Hz, 1H), 3.54 – 3.42 (m, 2H), 2.86 (d, *J* = 13.9 Hz, 1H), 2.40 (s, 1H), 2.15 – 1.94 (m, 2H); <sup>13</sup>C NMR (126 MHz, CDCl<sub>3</sub>) δ 150.2, 143.0, 137.5, 128.2, 127.5, 126.7, 126.5, 125.0, 124.1, 119.0, 118.3, 115.8, 73.3, 66.9, 66.6, 62.3, 50.5, 42.7; HRMS (ESI) calculated for C<sub>20</sub>H<sub>22</sub>NO<sub>5</sub>S<sup>+</sup> [M + H]<sup>+</sup> 388.1213, found 388.1214.

# $^1\text{H}$ NMR and $^{13}\text{C}$ NMR Spectra of Products

## $^1\text{H}$ NMR (500 MHz, $\text{CDCl}_3$ )

7.38  
7.37  
7.37  
7.36  
7.36  
7.35  
7.35  
7.30  
7.30  
7.29  
7.27  
7.27  
7.26  
7.25  
7.24  
7.24  
7.24  
7.22  
7.22  
7.22  
7.21  
7.21  
7.20  
7.20  
7.19  
7.08  
7.08  
7.07  
7.07  
7.05  
7.05  
6.98  
6.98  
6.97  
6.96  
6.95  
6.95  
6.95  
6.34  
6.31  
6.30  
6.28  
6.01  
5.29  
5.27  
4.98  
4.98  
3.57  
3.26  
3.25  
3.10  
3.07  
3.04  
3.01

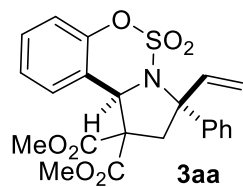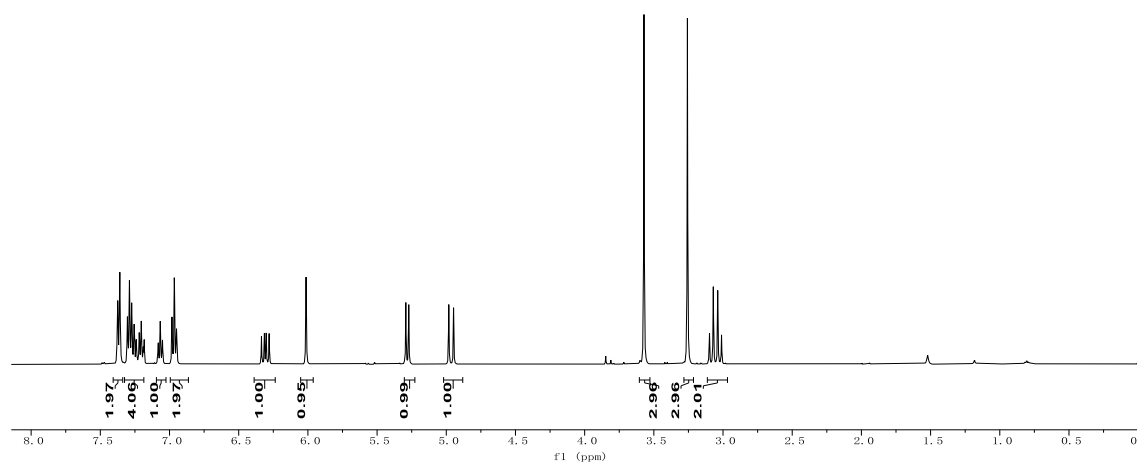

## $^{13}\text{C}$ NMR (126 MHz, $\text{CDCl}_3$ )

168.70  
167.66  
151.66  
140.00  
138.78  
129.88  
128.16  
127.62  
127.36  
126.04  
125.09  
119.57  
119.45  
118.27  
73.78  
66.99  
63.18  
53.13  
53.08  
45.47

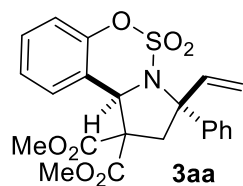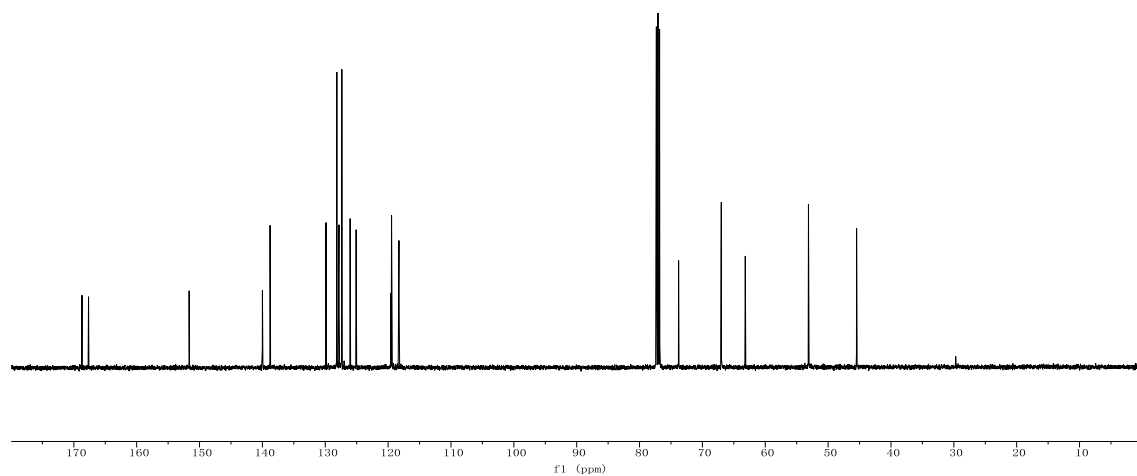

### <sup>1</sup>H NMR (500 MHz, CDCl<sub>3</sub>)

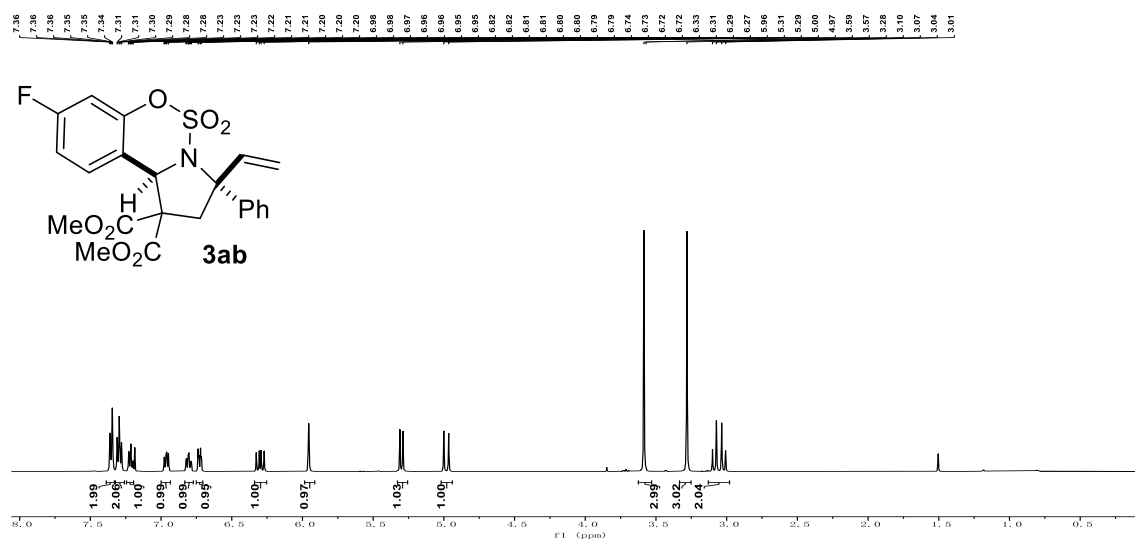

### <sup>13</sup>C NMR (126 MHz, CDCl<sub>3</sub>)

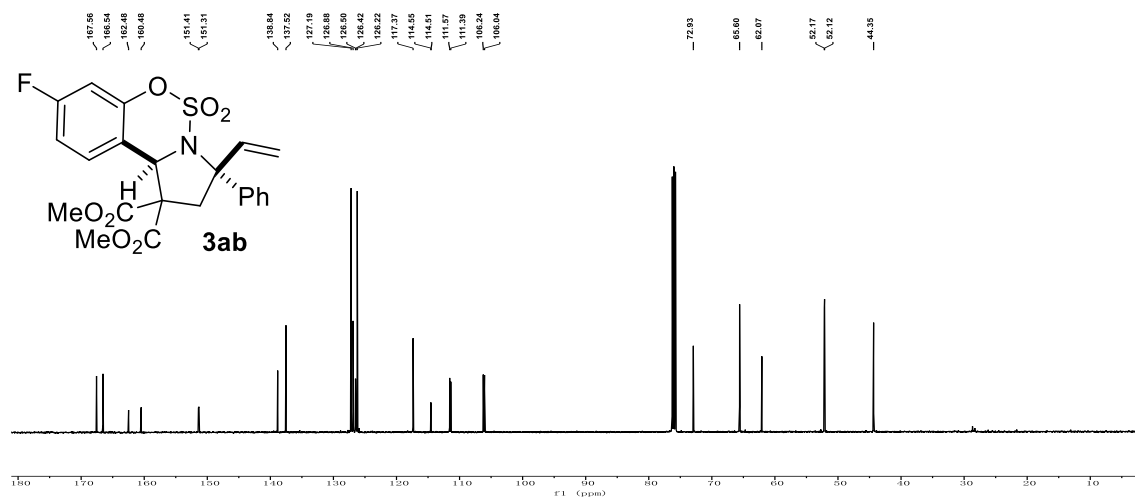

### <sup>19</sup>F NMR (471 MHz, CDCl<sub>3</sub>)

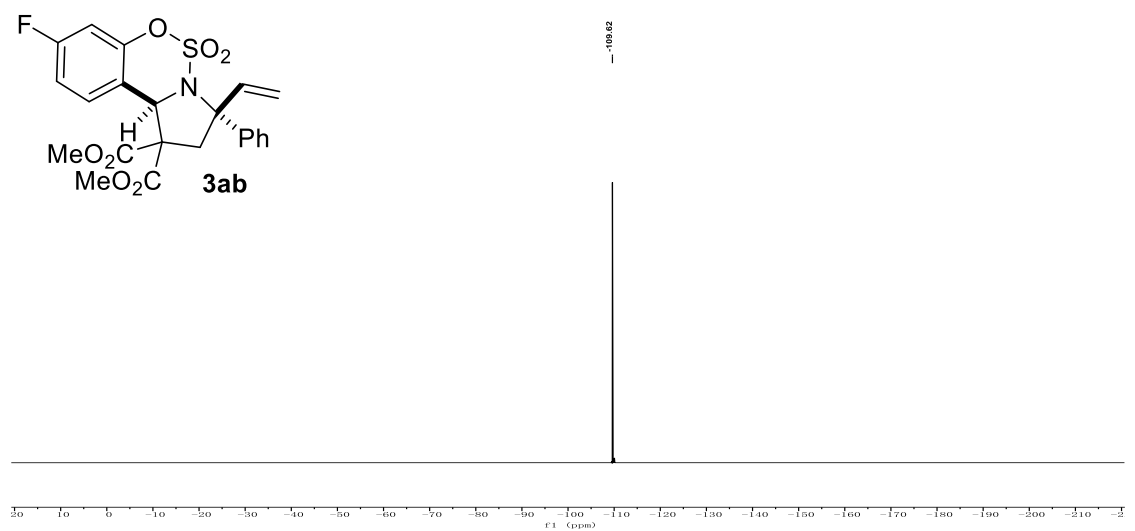

### <sup>1</sup>H NMR (500 MHz, CDCl<sub>3</sub>)

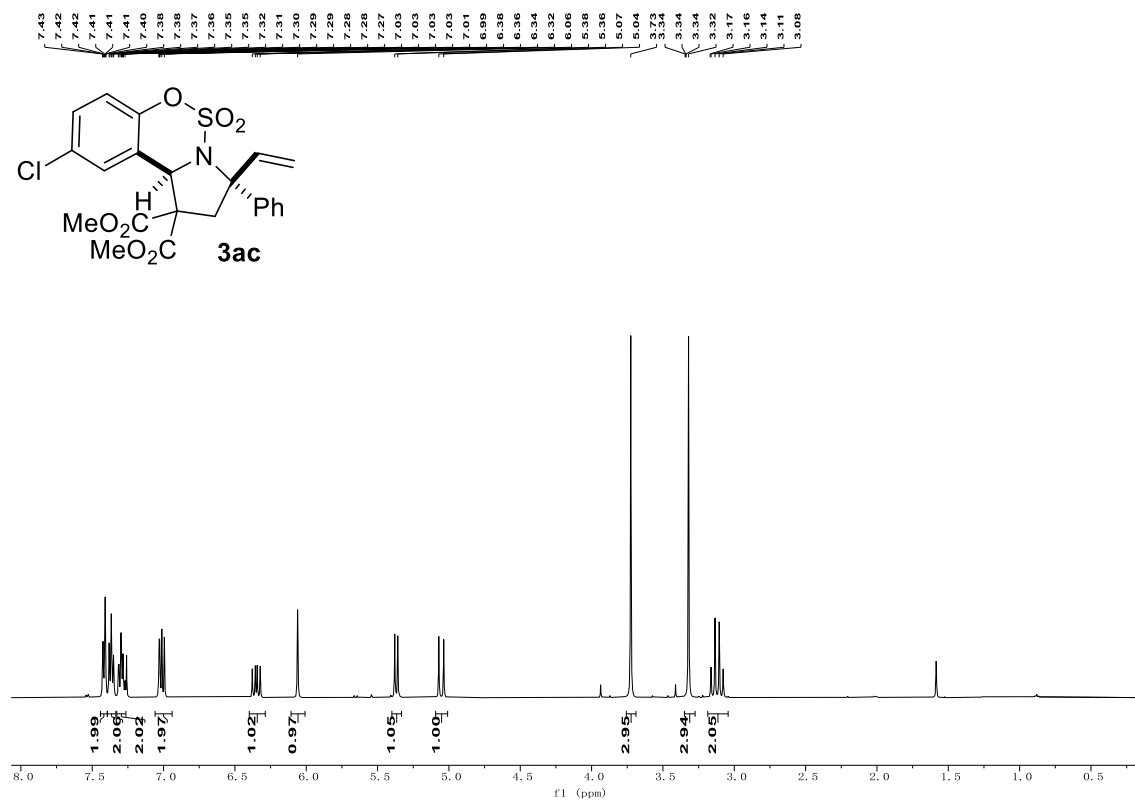

### <sup>13</sup>C NMR (126 MHz, CDCl<sub>3</sub>)

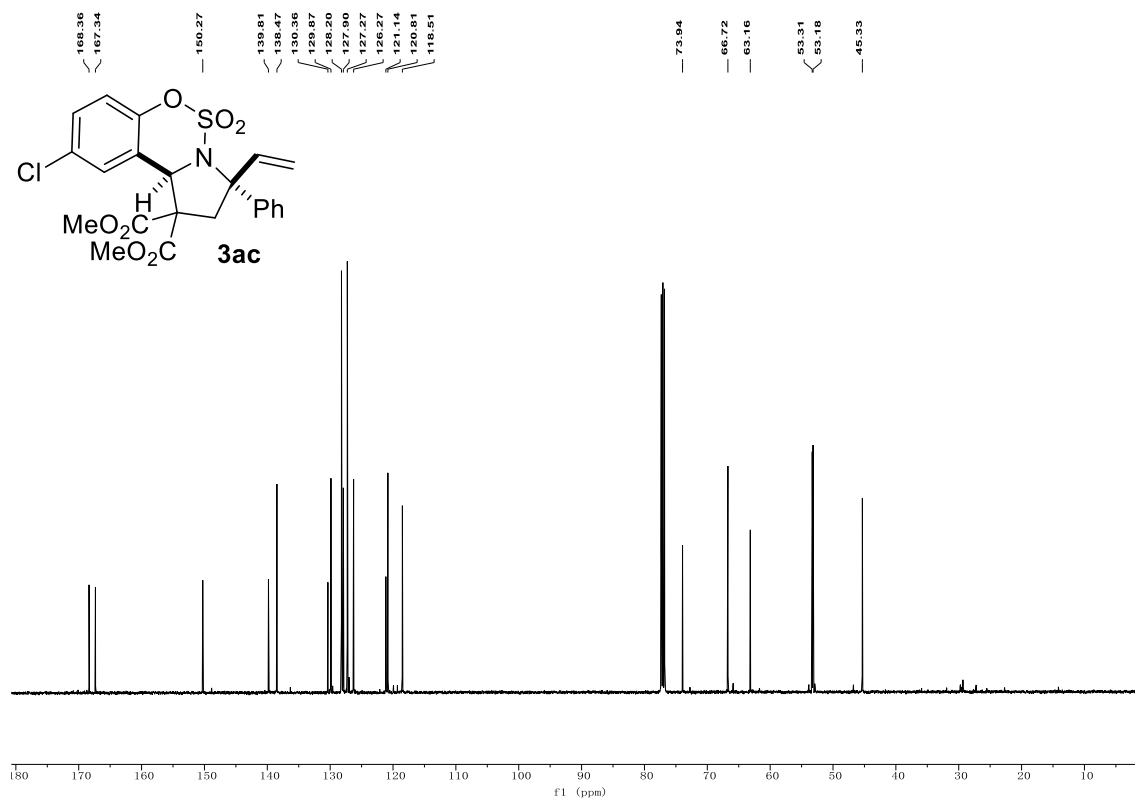

### $^1\text{H}$ NMR (500 MHz, $\text{CDCl}_3$ )

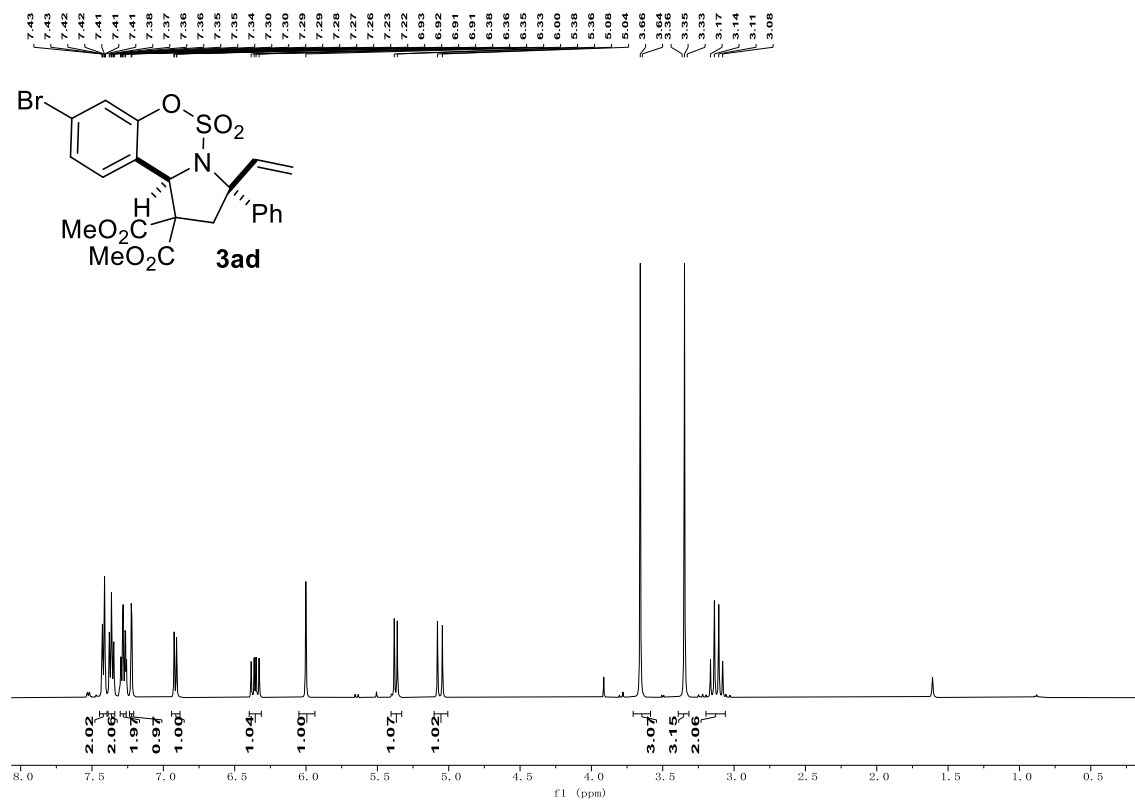

### $^{13}\text{C}$ NMR (126 MHz, $\text{CDCl}_3$ )

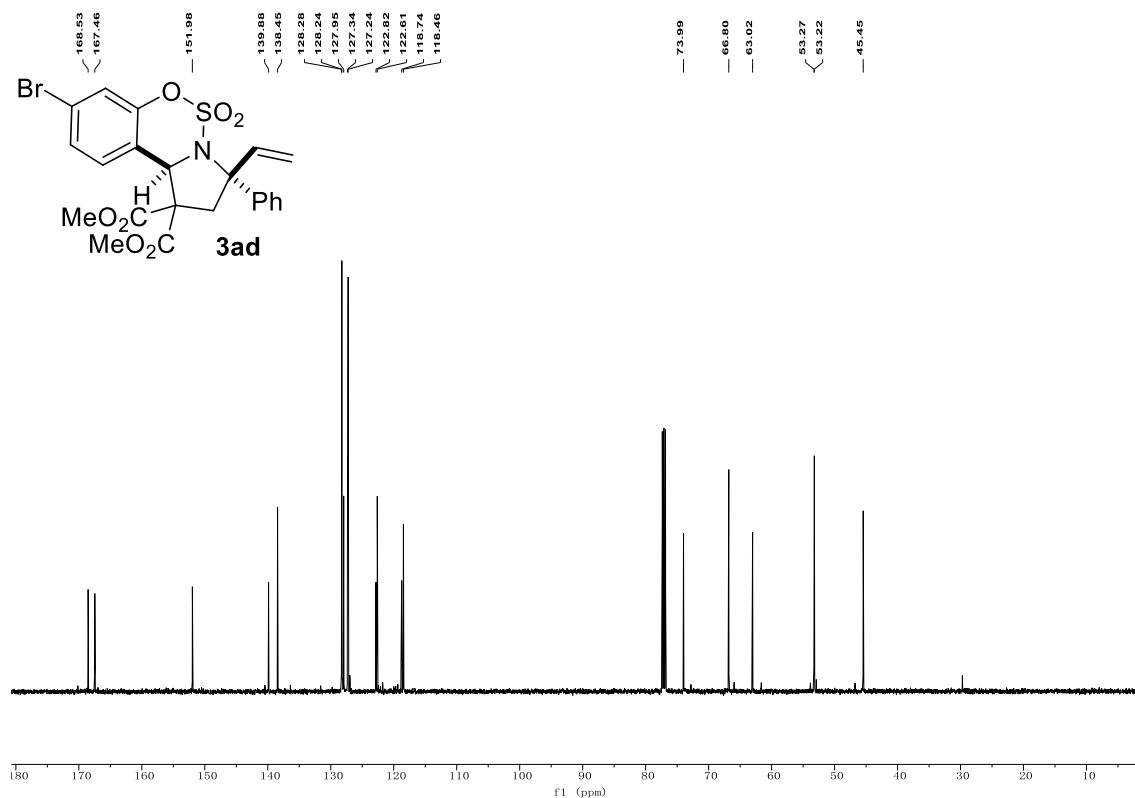



### $^1\text{H}$ NMR (500 MHz, $\text{CDCl}_3$ )

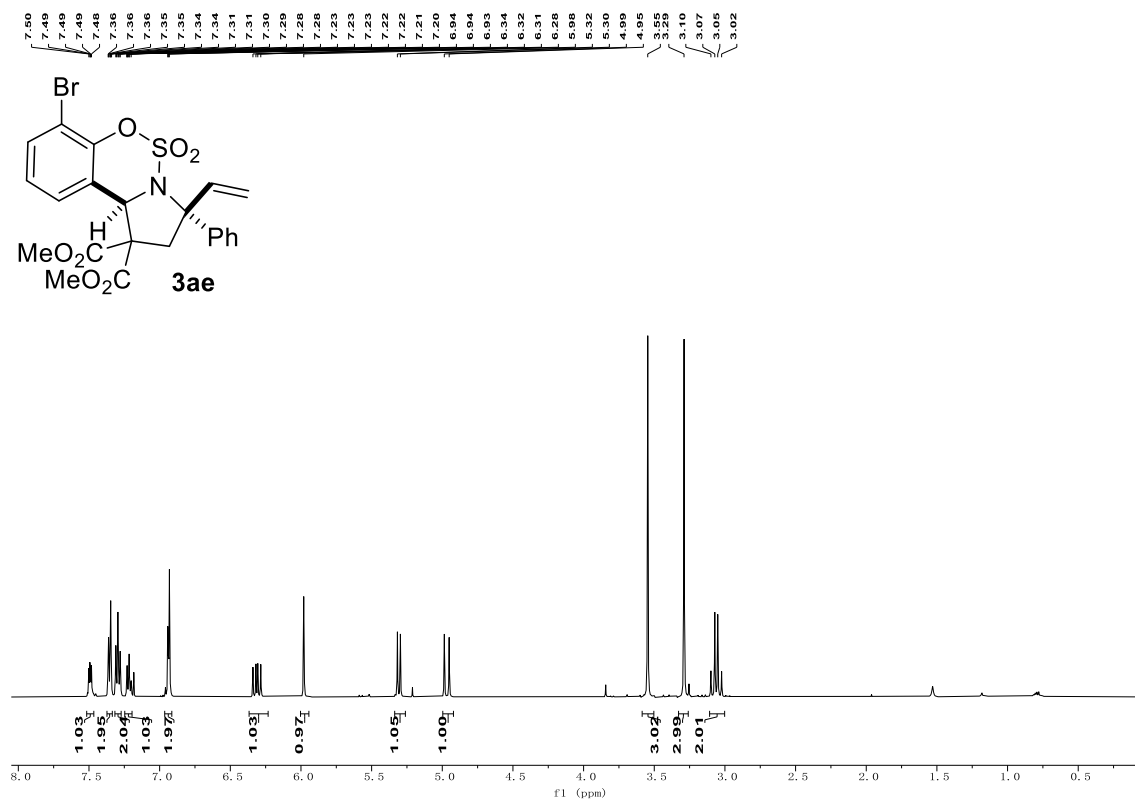

### $^{13}\text{C}$ NMR (126 MHz, $\text{CDCl}_3$ )

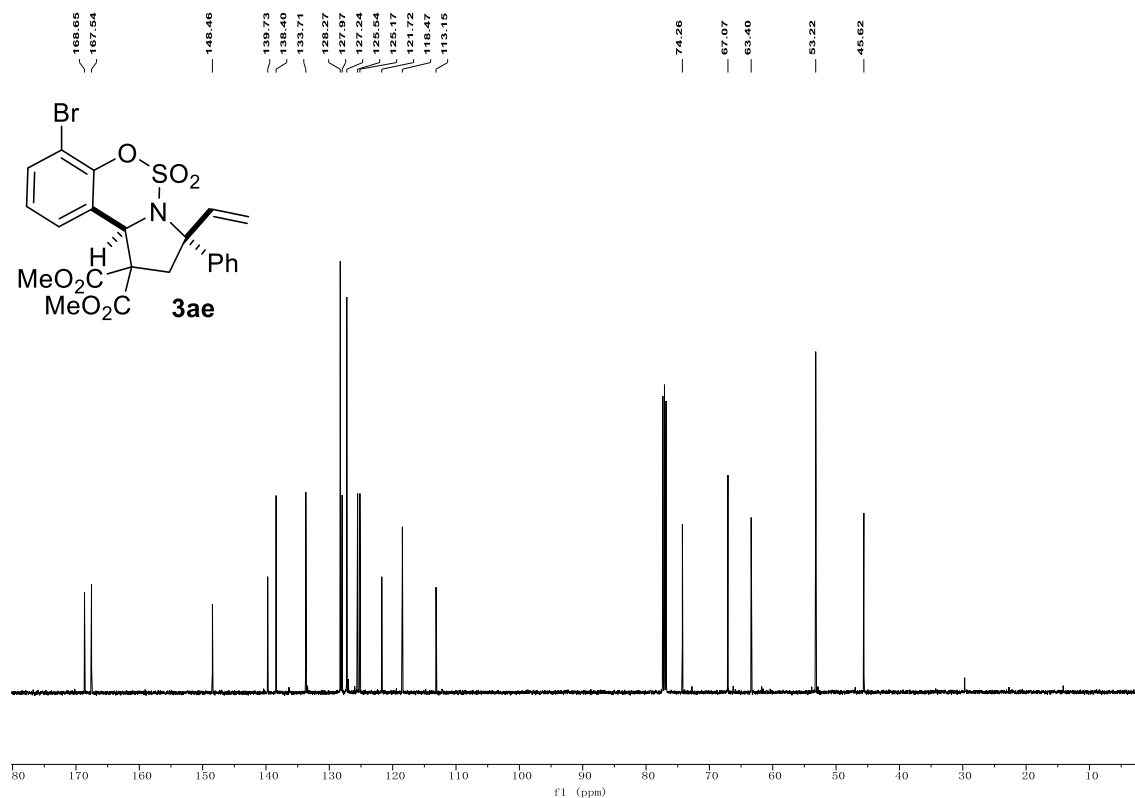

### <sup>1</sup>H NMR (500 MHz, CDCl<sub>3</sub>)

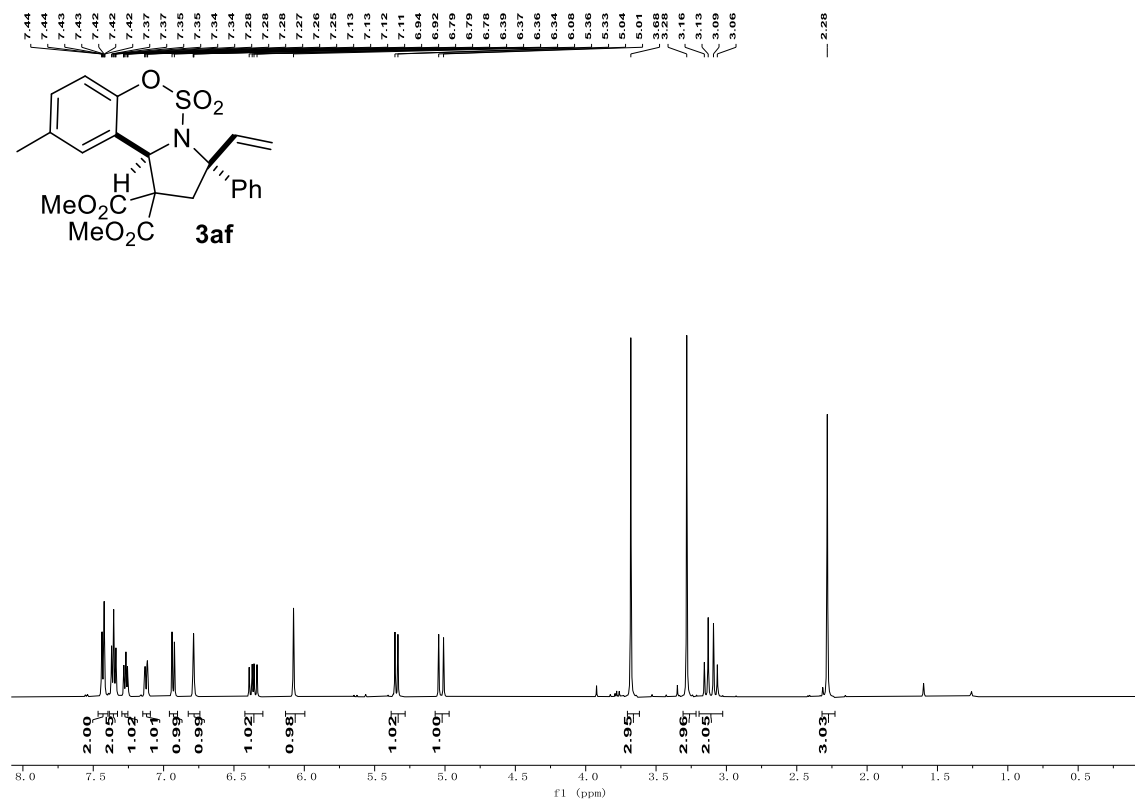

### <sup>13</sup>C NMR (126 MHz, CDCl<sub>3</sub>)

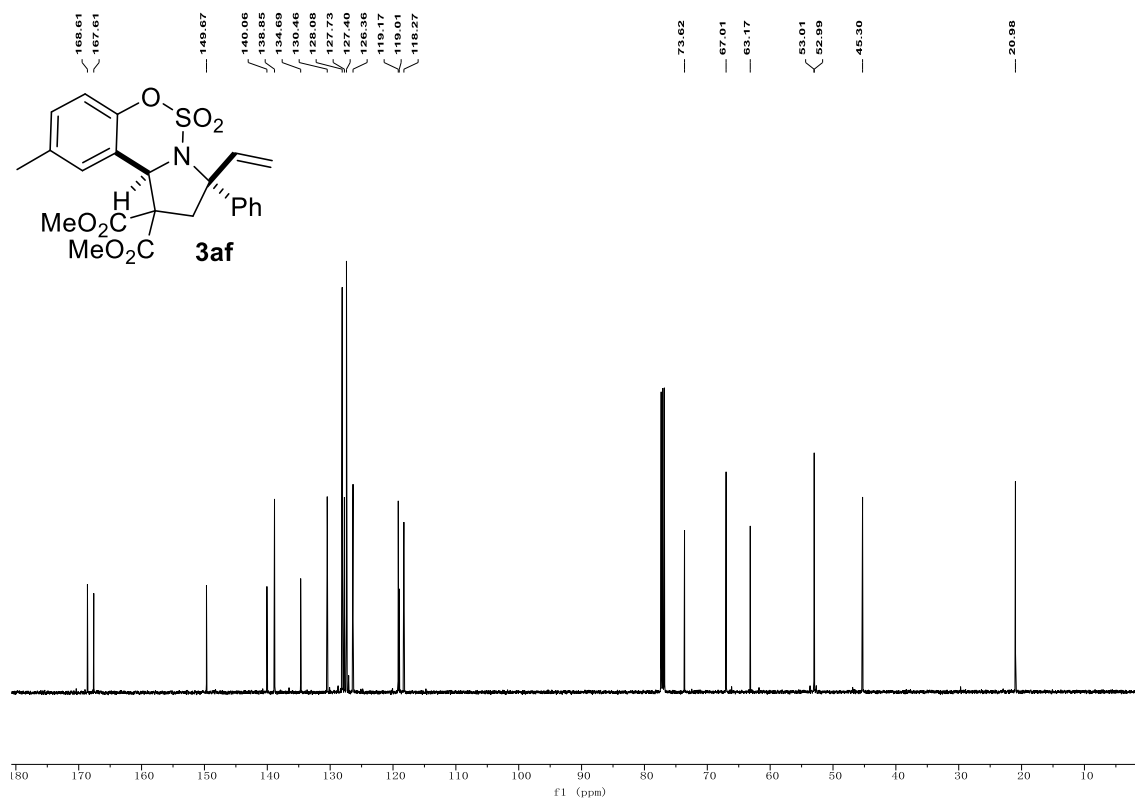

# <sup>1</sup>H NMR (500 MHz, CDCl<sub>3</sub>)

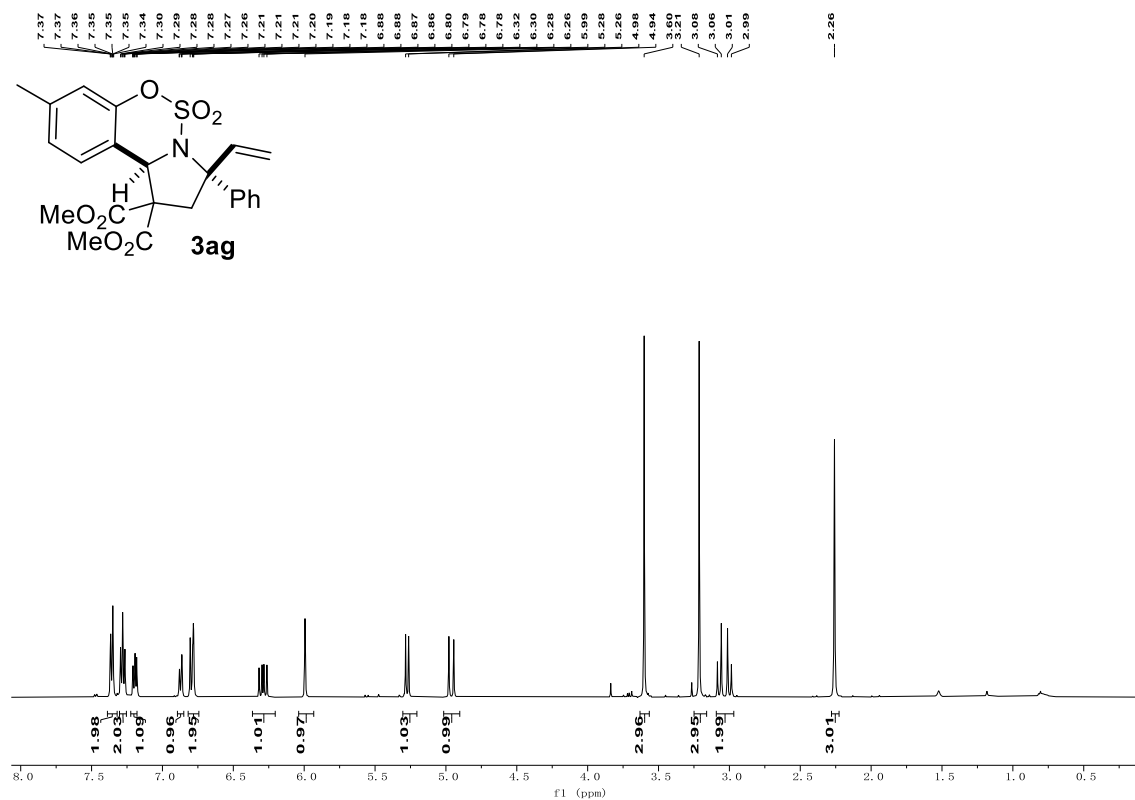

# <sup>13</sup>C NMR (126 MHz, CDCl<sub>3</sub>)

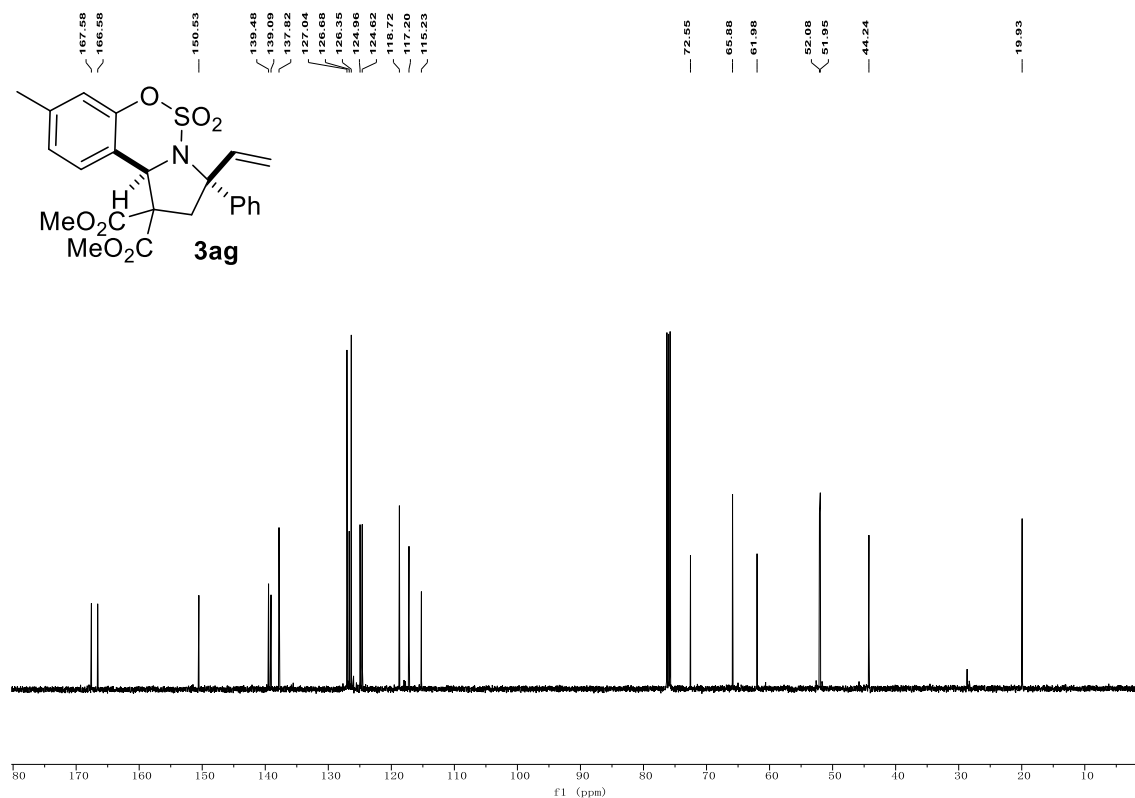

### $^1\text{H}$ NMR (500 MHz, $\text{CDCl}_3$ )

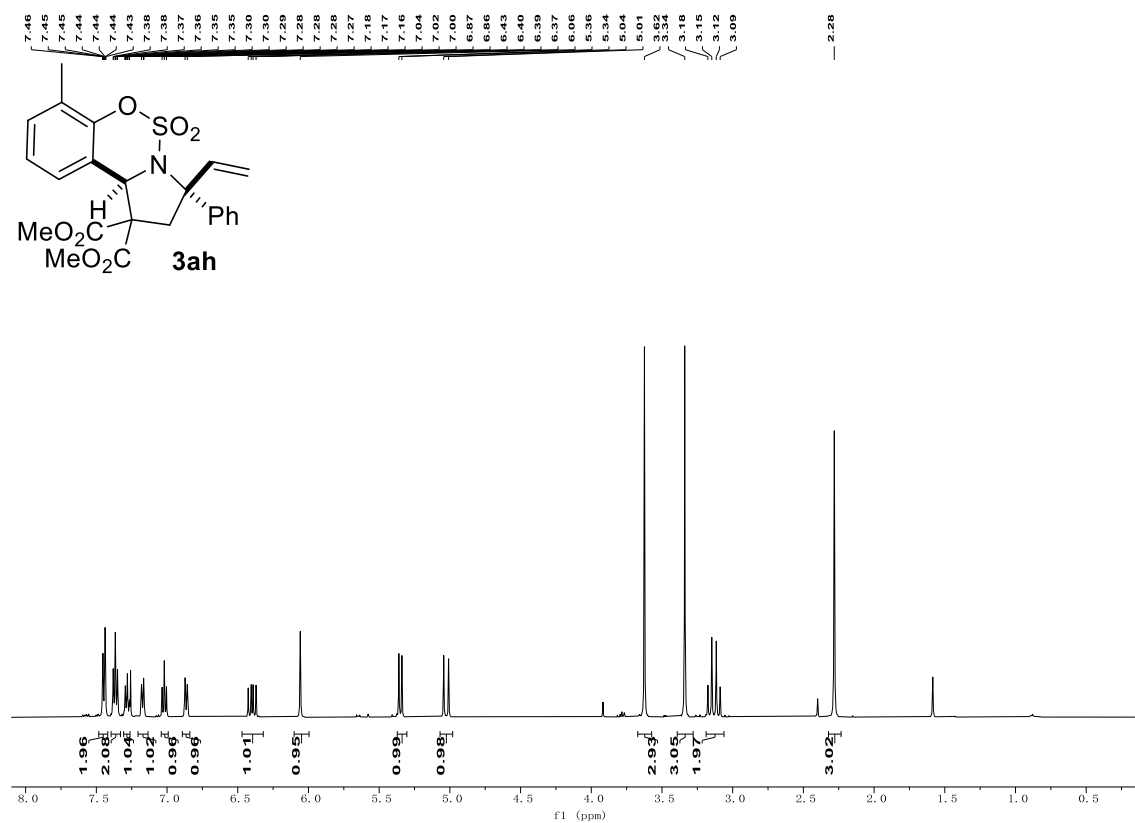

### $^{13}\text{C}$ NMR (126 MHz, $\text{CDCl}_3$ )

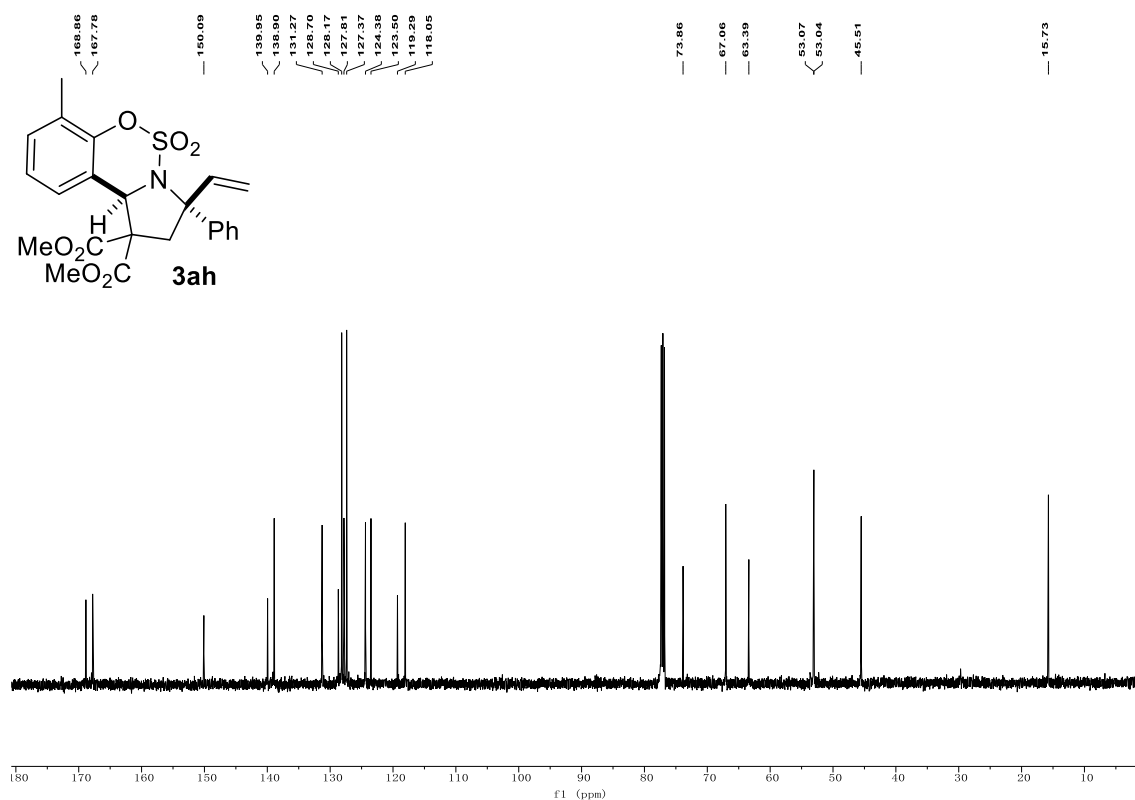

### <sup>1</sup>H NMR (500 MHz, CDCl<sub>3</sub>)

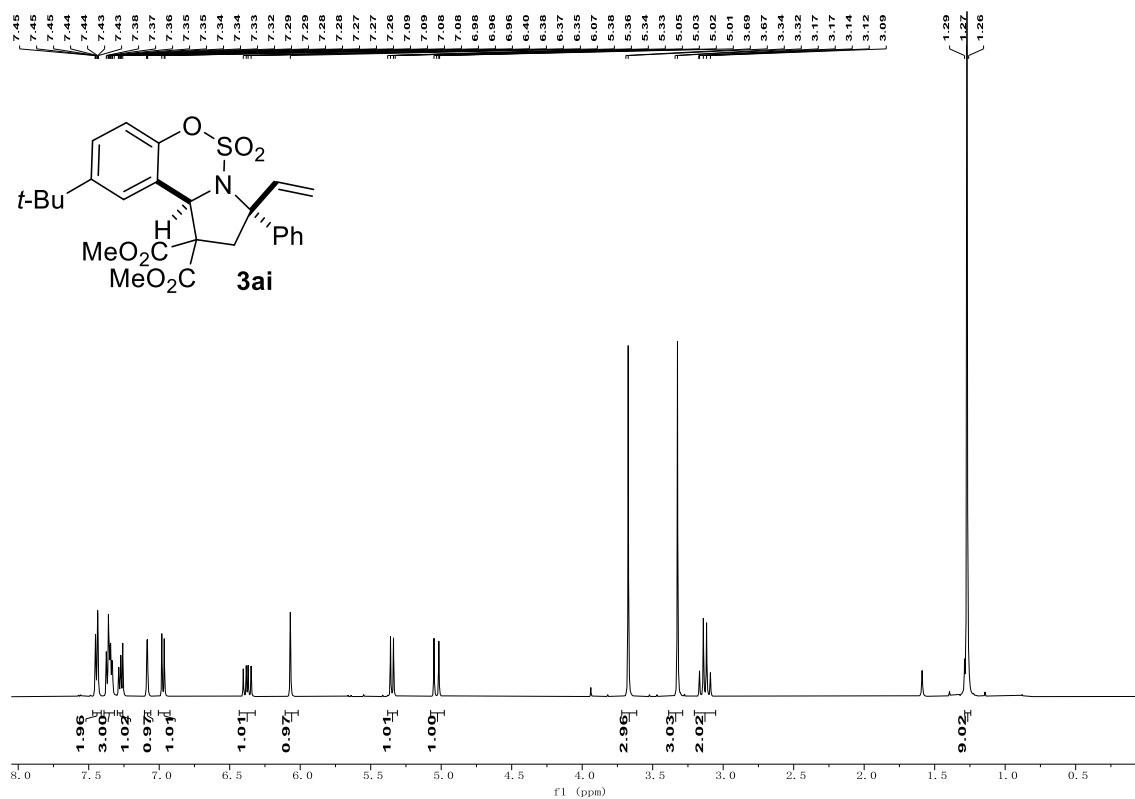

### <sup>13</sup>C NMR (126 MHz, CDCl<sub>3</sub>)

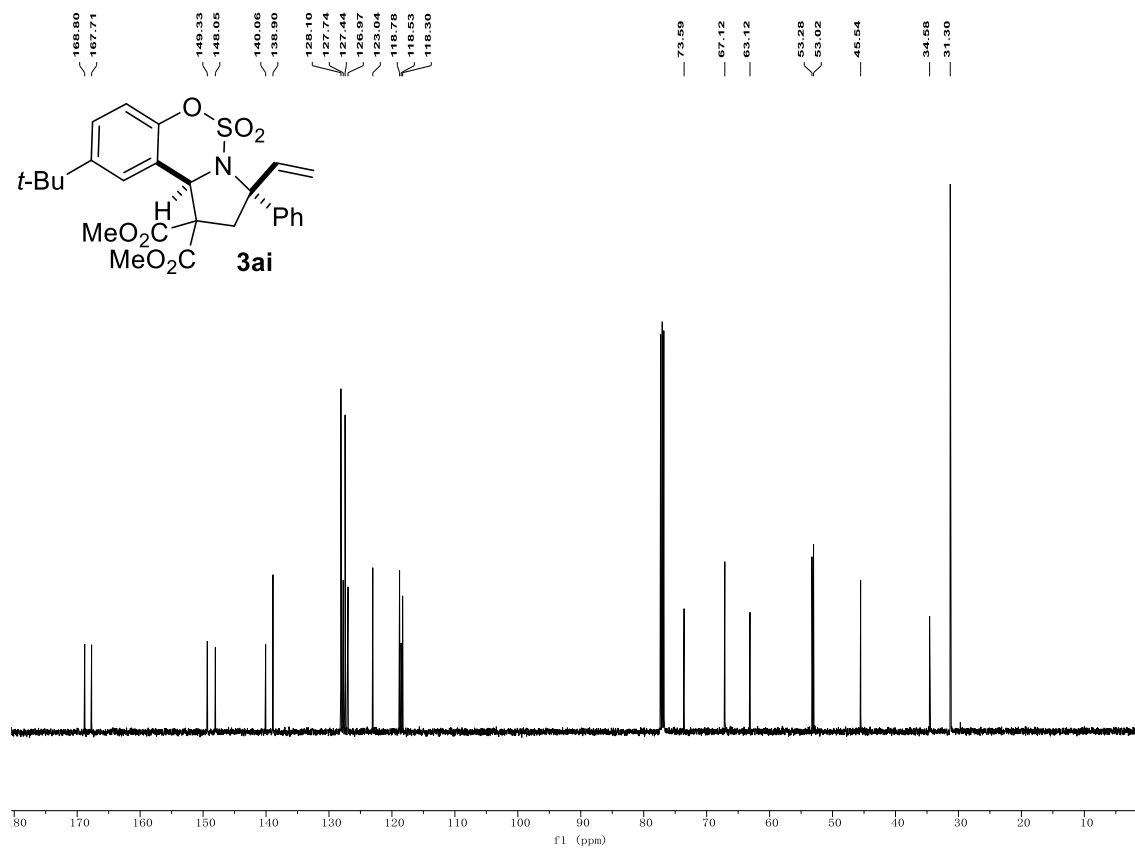

### <sup>1</sup>H NMR (500 MHz, CDCl<sub>3</sub>)

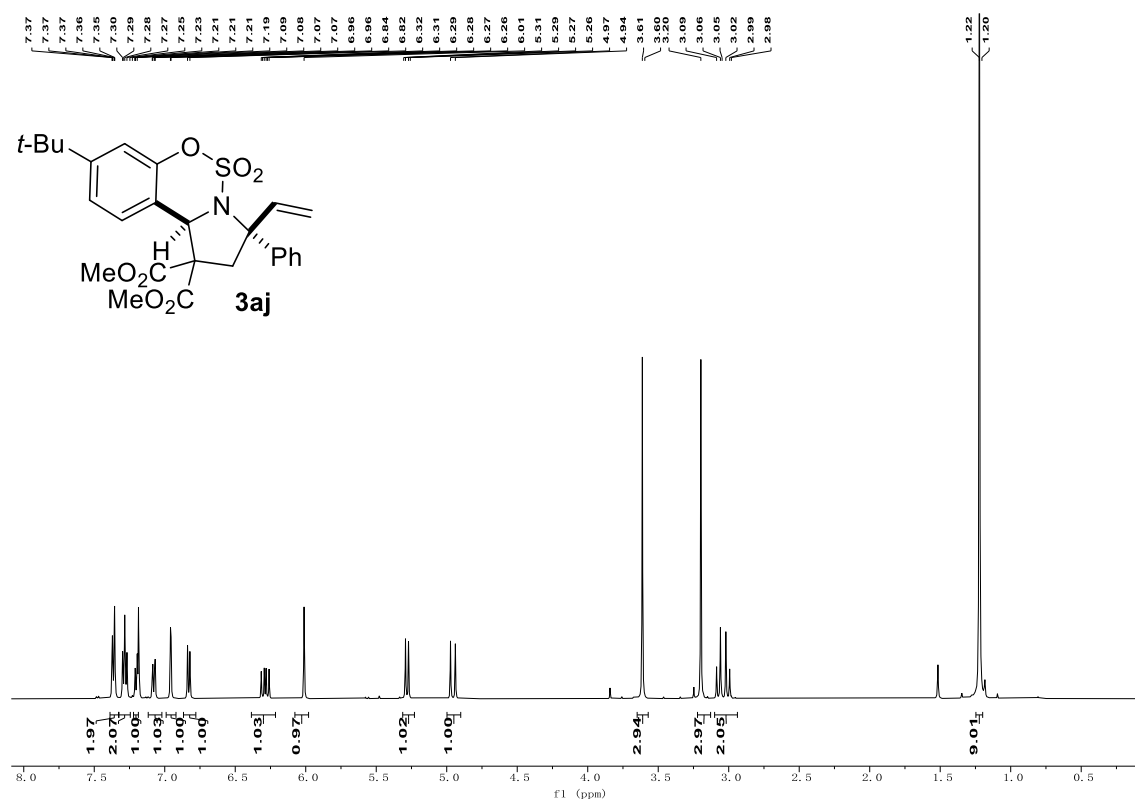

### <sup>13</sup>C NMR (126 MHz, CDCl<sub>3</sub>)

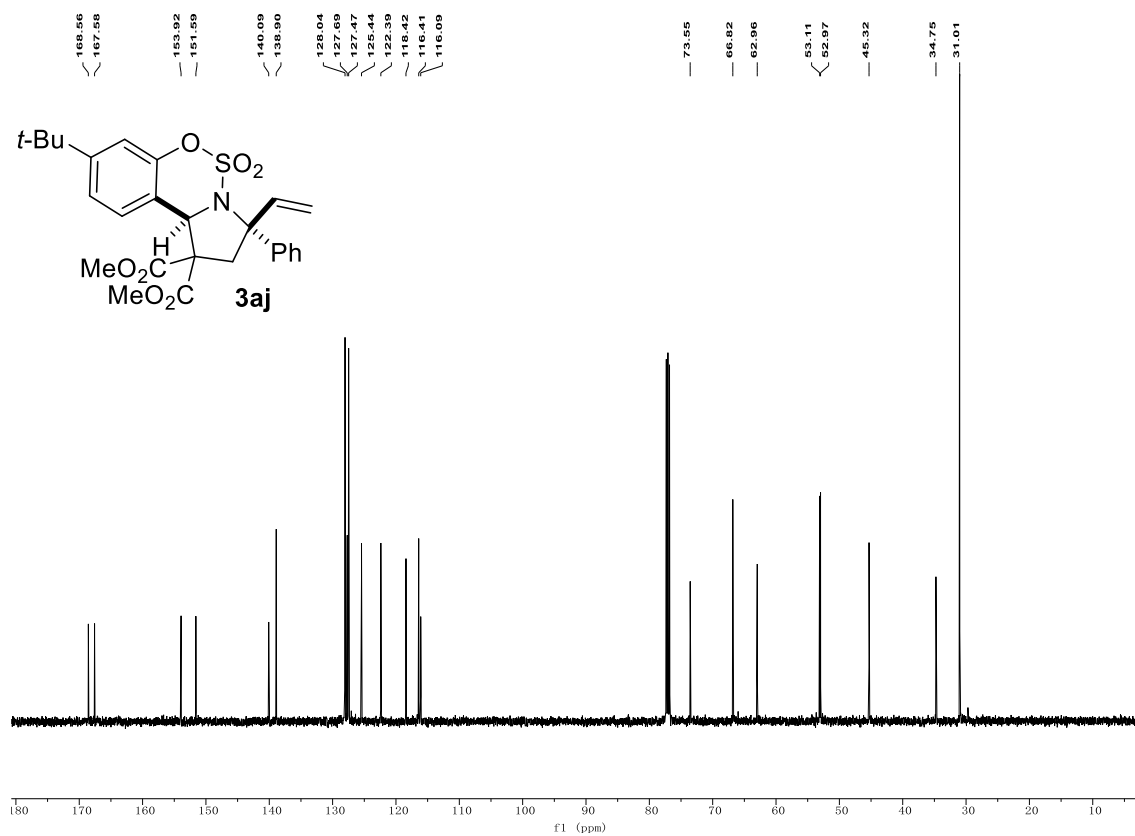

# <sup>1</sup>H NMR (500 MHz, CDCl<sub>3</sub>)

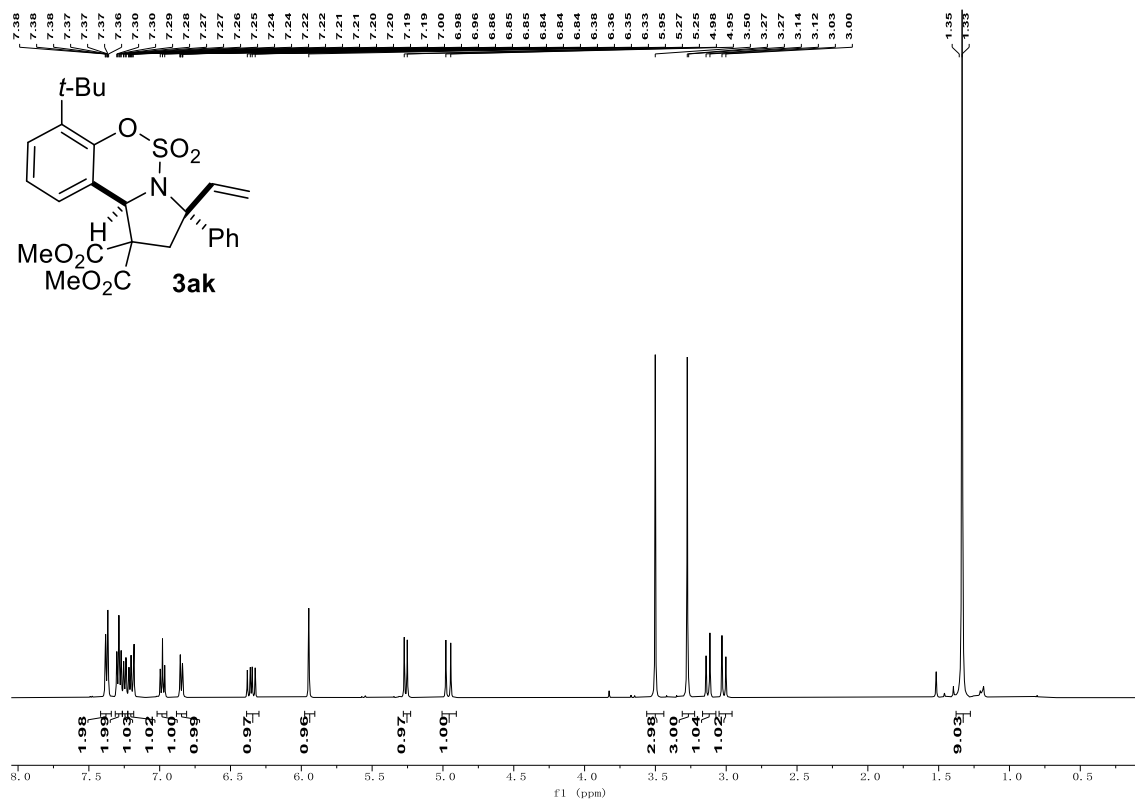

# <sup>13</sup>C NMR (126 MHz, CDCl<sub>3</sub>)

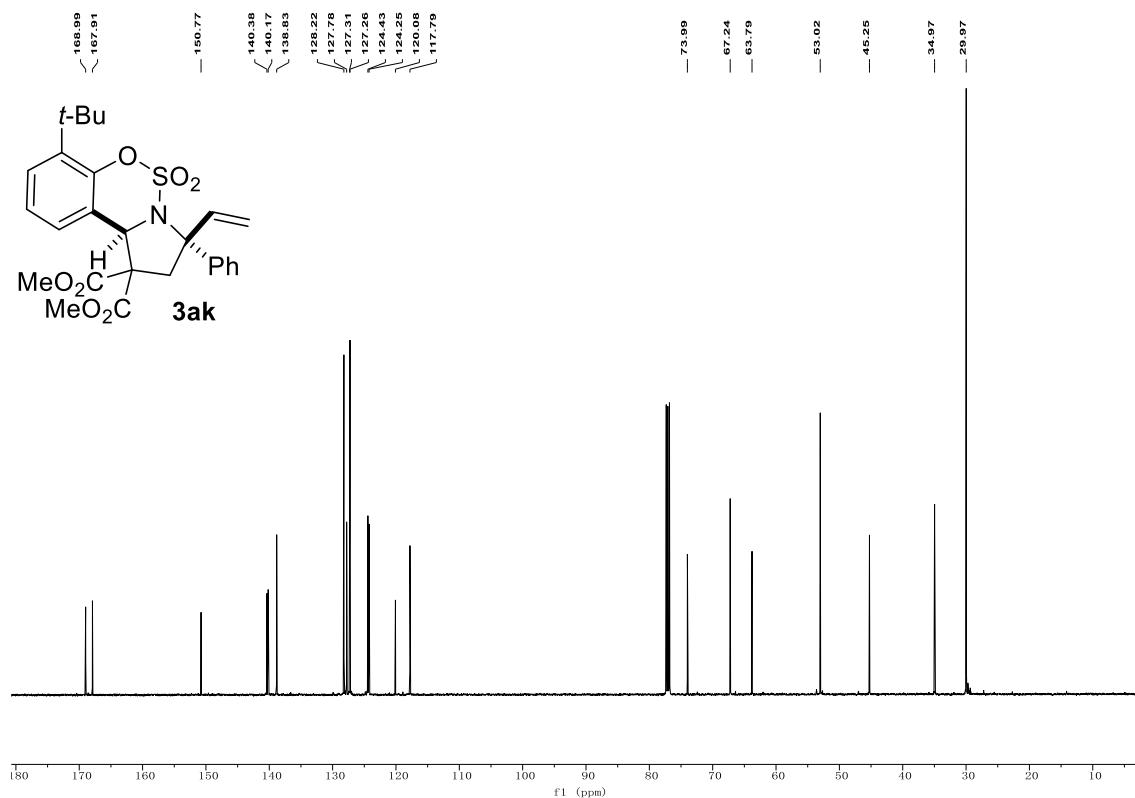

### <sup>1</sup>H NMR (500 MHz, CDCl<sub>3</sub>)

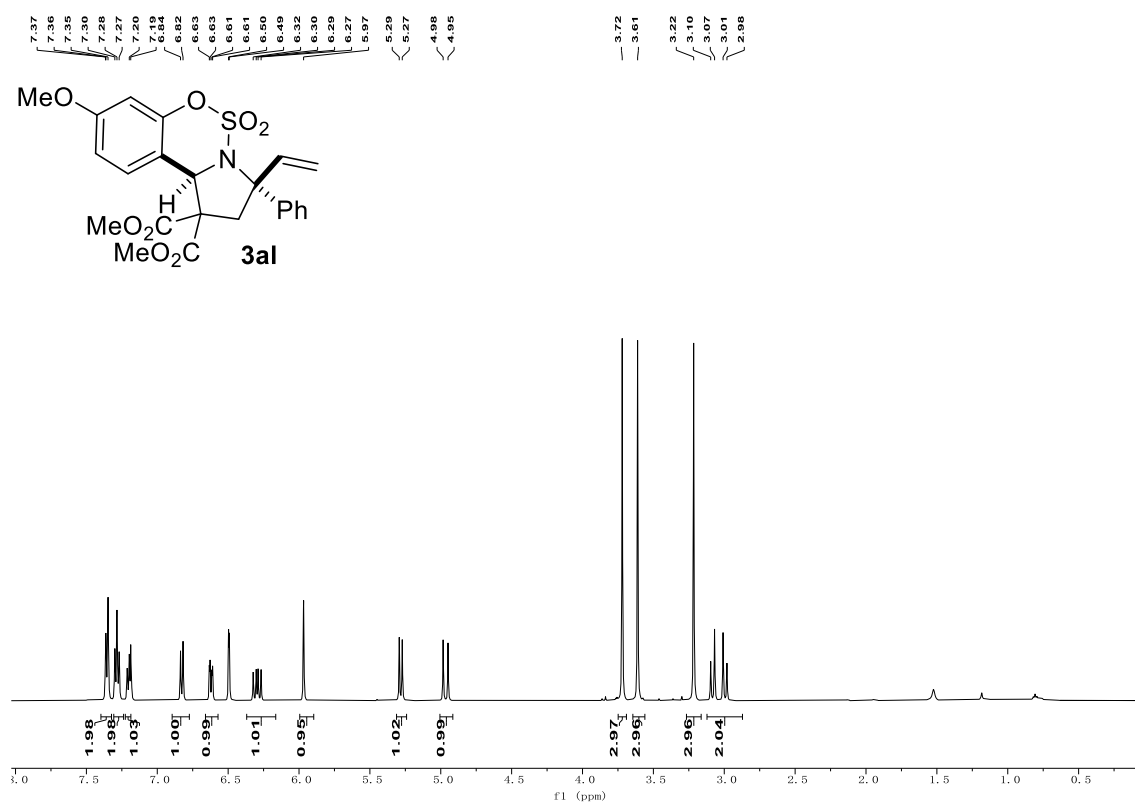

### <sup>13</sup>C NMR (126 MHz, CDCl<sub>3</sub>)

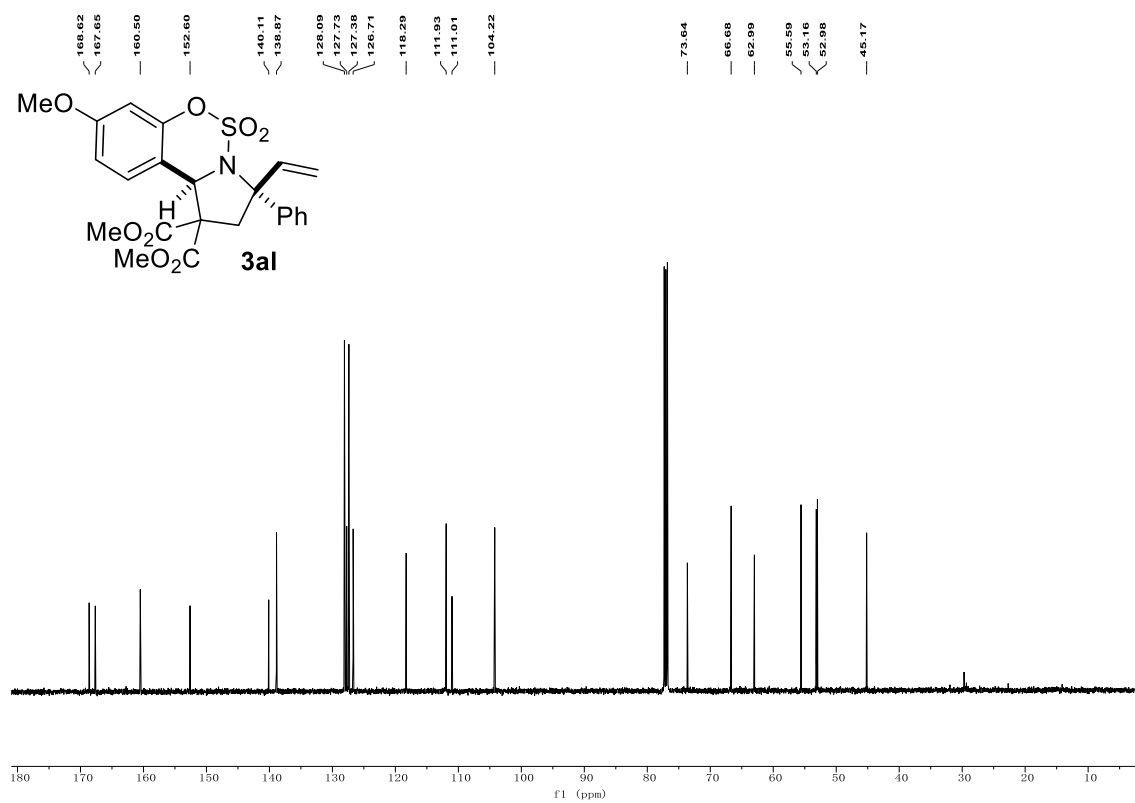



### <sup>1</sup>H NMR (500 MHz, CDCl<sub>3</sub>)

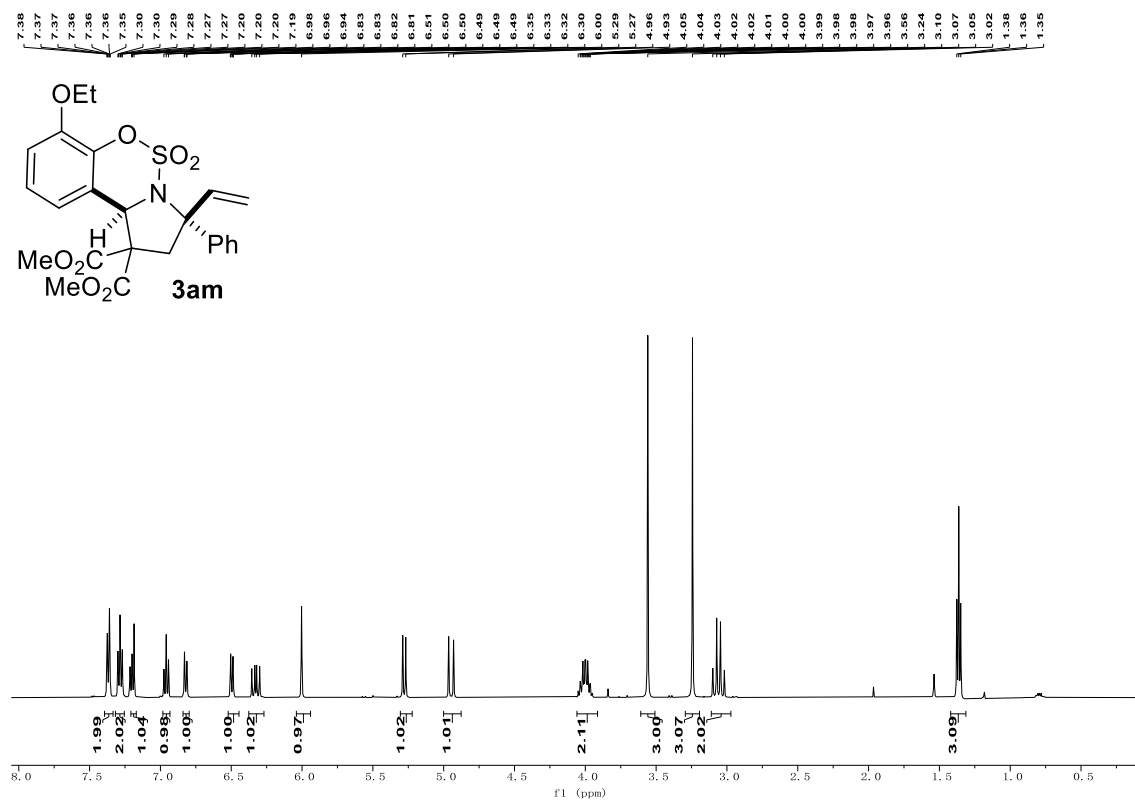

### <sup>13</sup>C NMR (126 MHz, CDCl<sub>3</sub>)

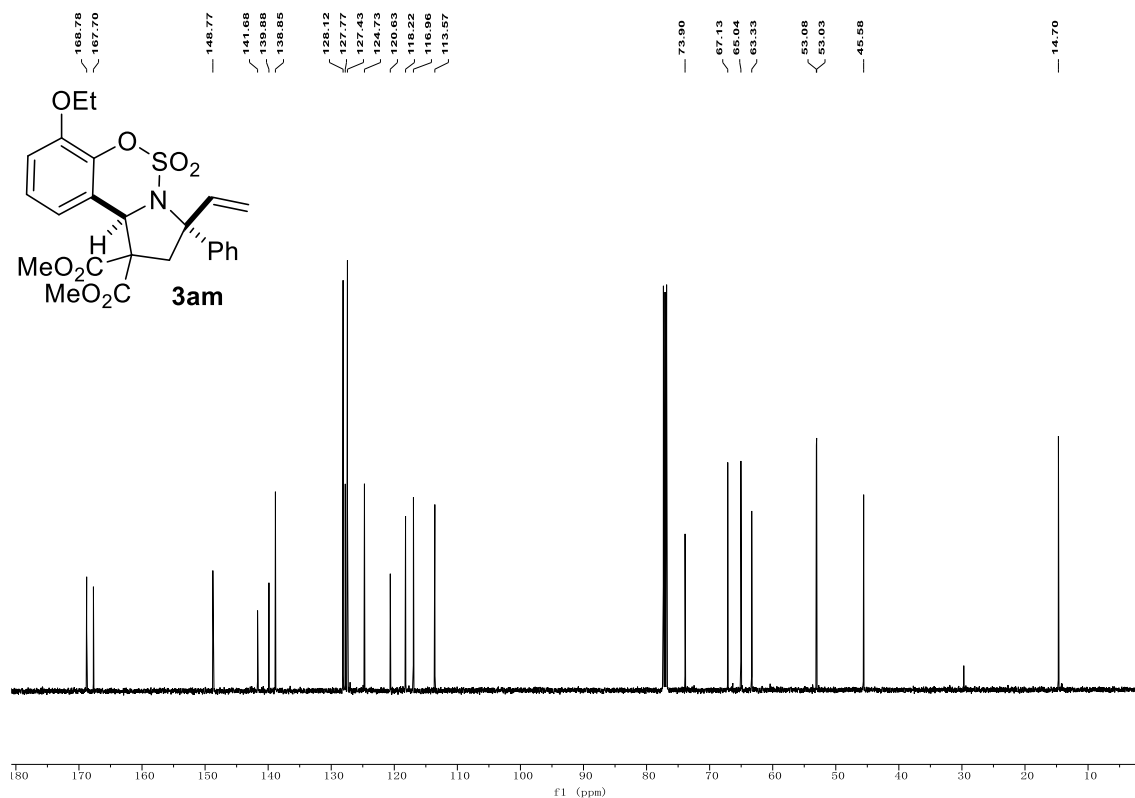

### <sup>1</sup>H NMR (500 MHz, CDCl<sub>3</sub>)

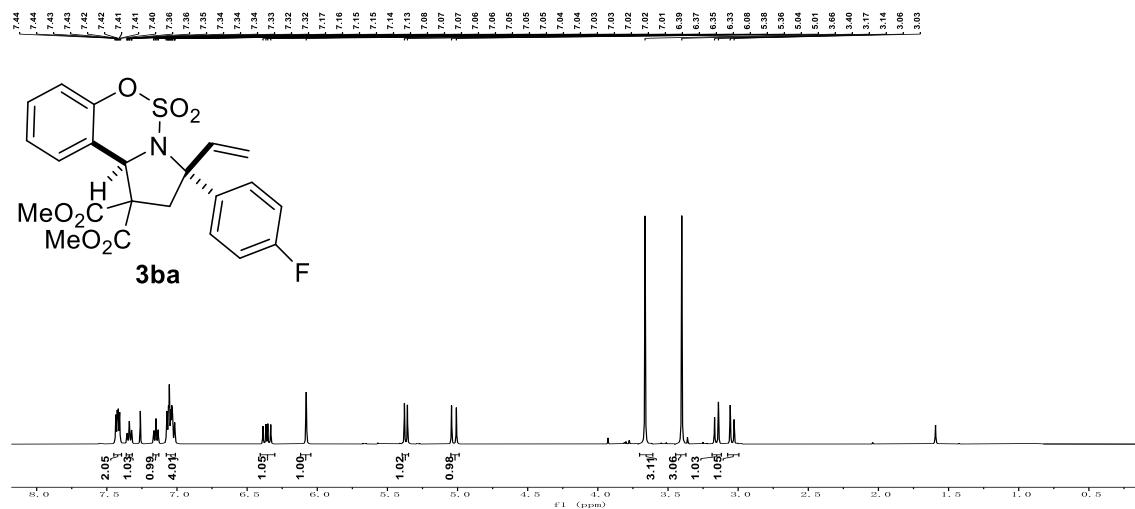

### <sup>13</sup>C NMR (126 MHz, CDCl<sub>3</sub>)

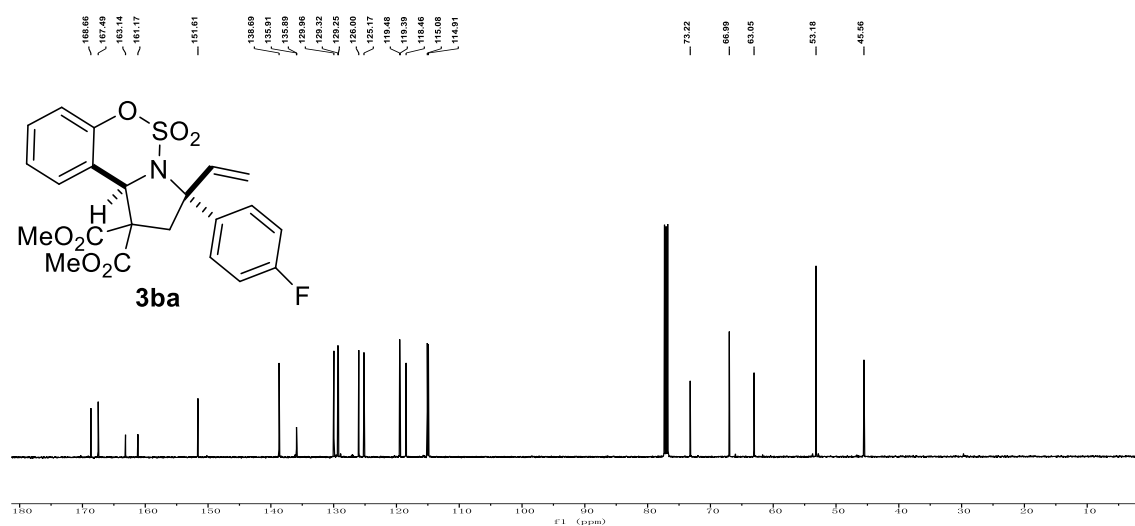

### <sup>19</sup>F NMR (471 MHz, CDCl<sub>3</sub>)

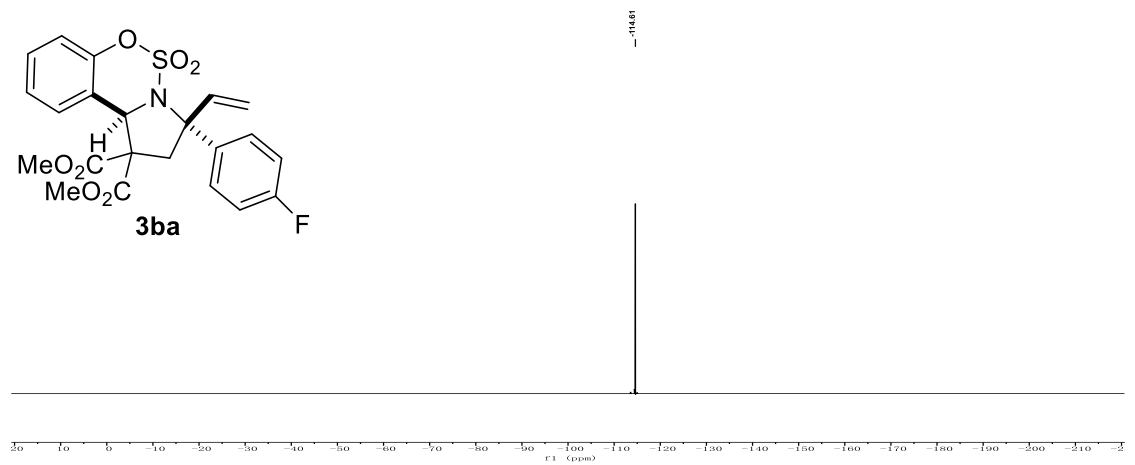

# $^1\text{H}$ NMR (500 MHz, $\text{CDCl}_3$ )

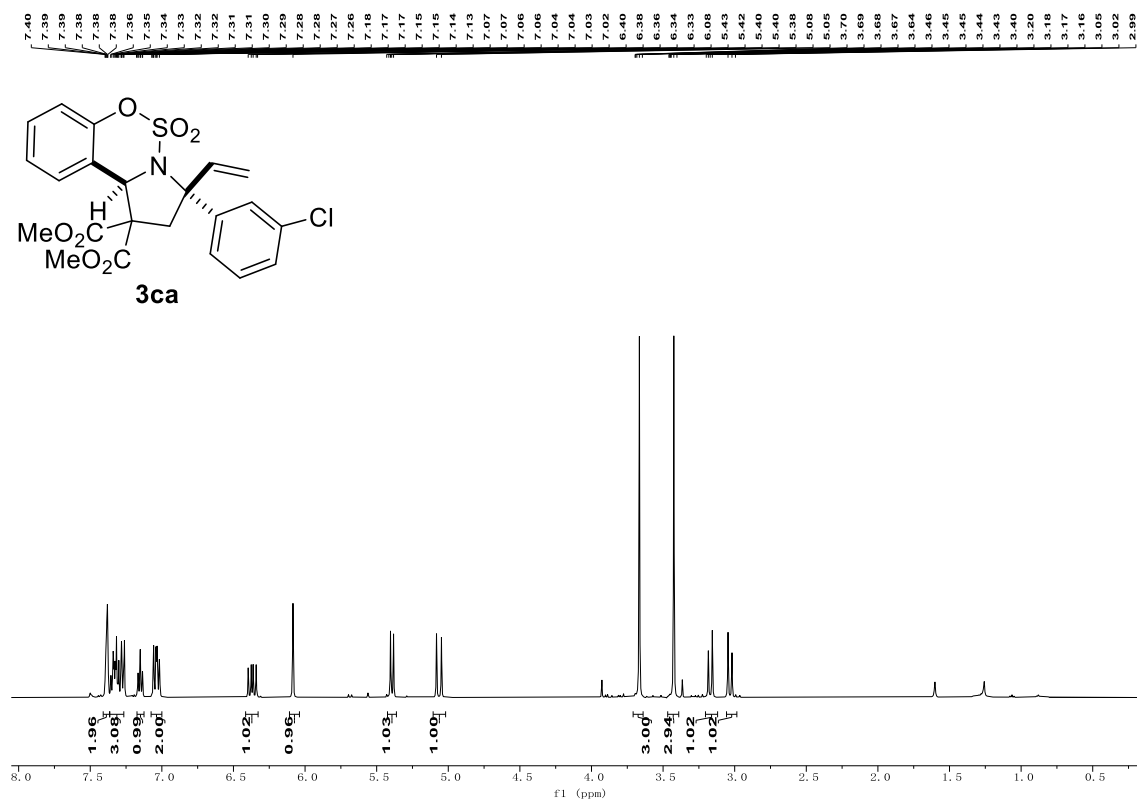

# $^{13}\text{C}$ NMR (126 MHz, $\text{CDCl}_3$ )

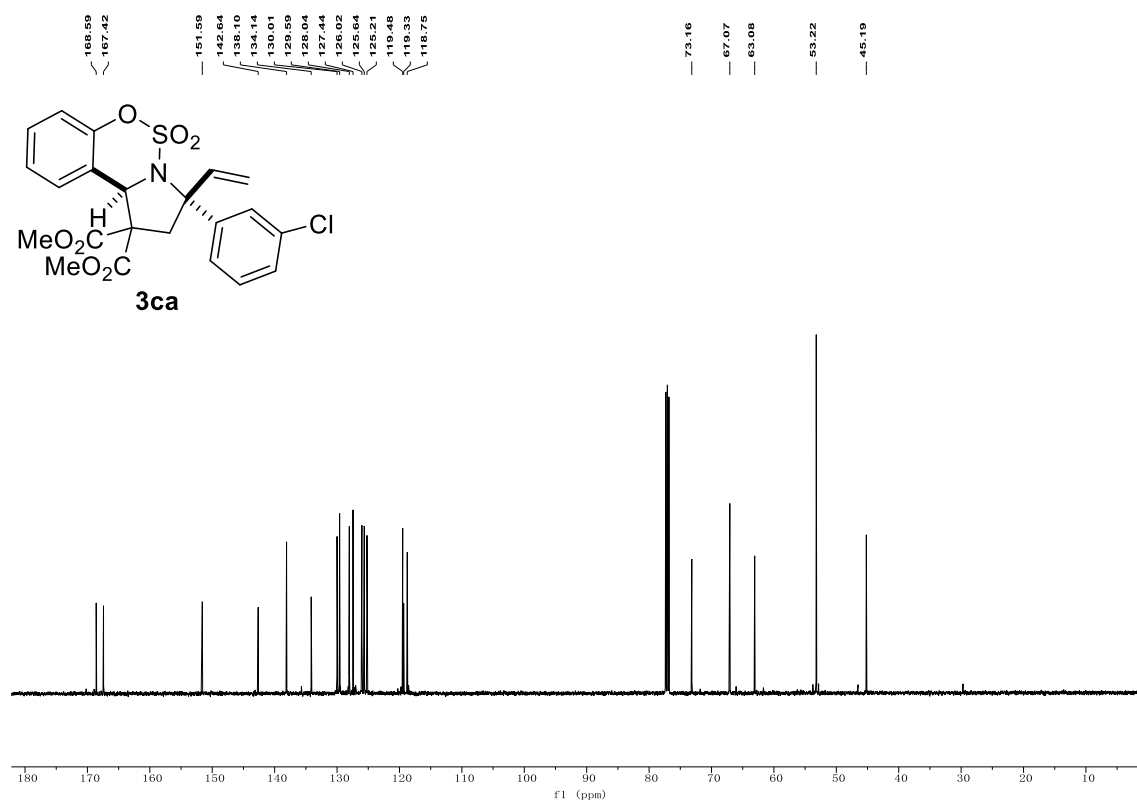

# <sup>1</sup>H NMR (500 MHz, CDCl<sub>3</sub>)

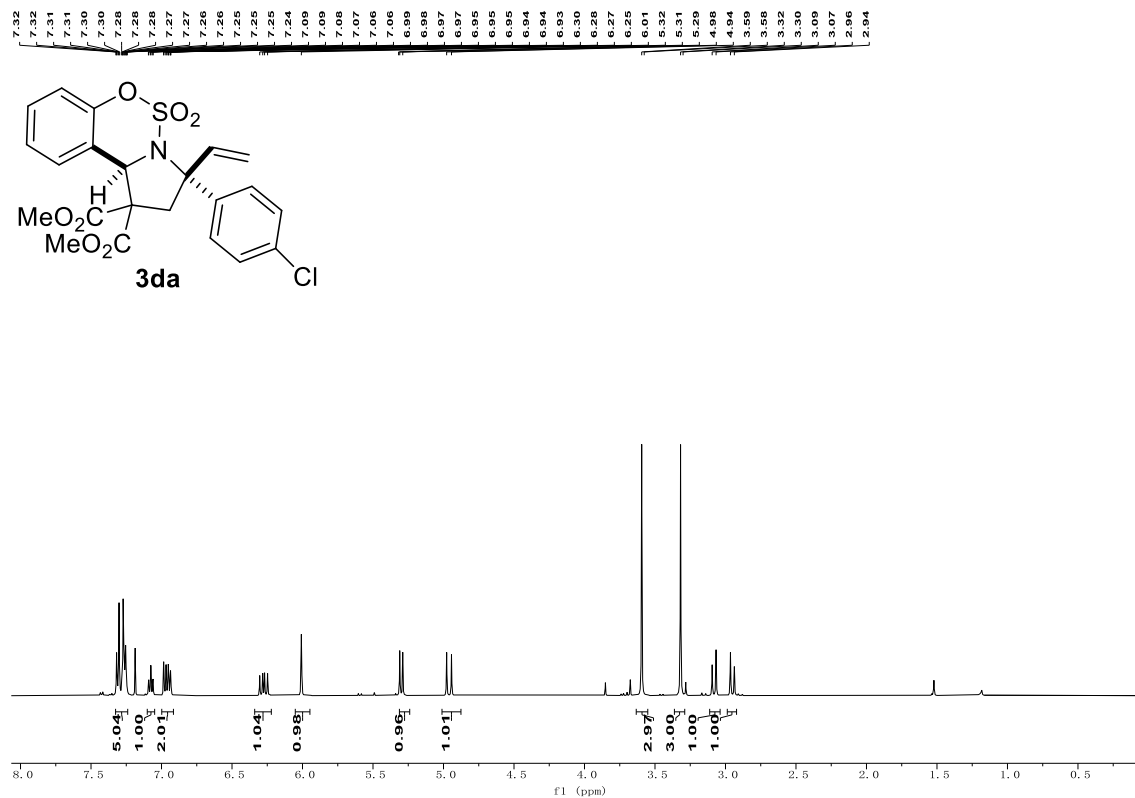

# <sup>13</sup>C NMR (126 MHz, CDCl<sub>3</sub>)

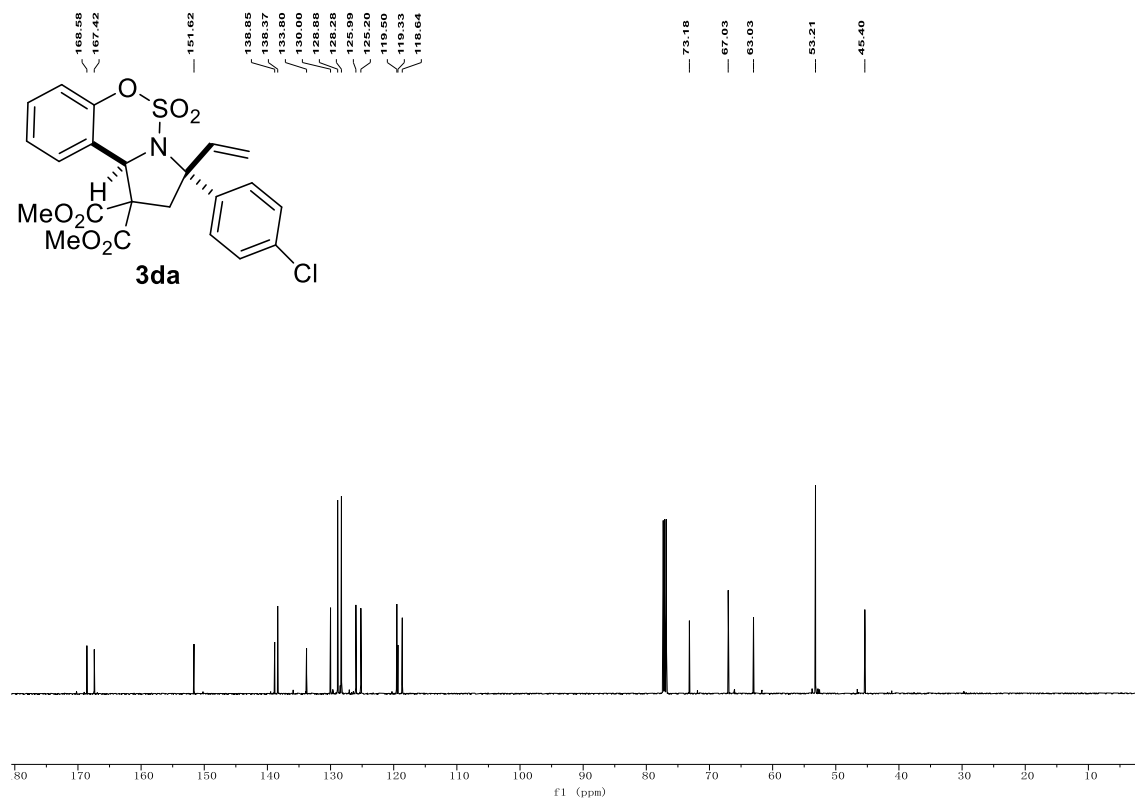

### <sup>1</sup>H NMR (500 MHz, CDCl<sub>3</sub>)

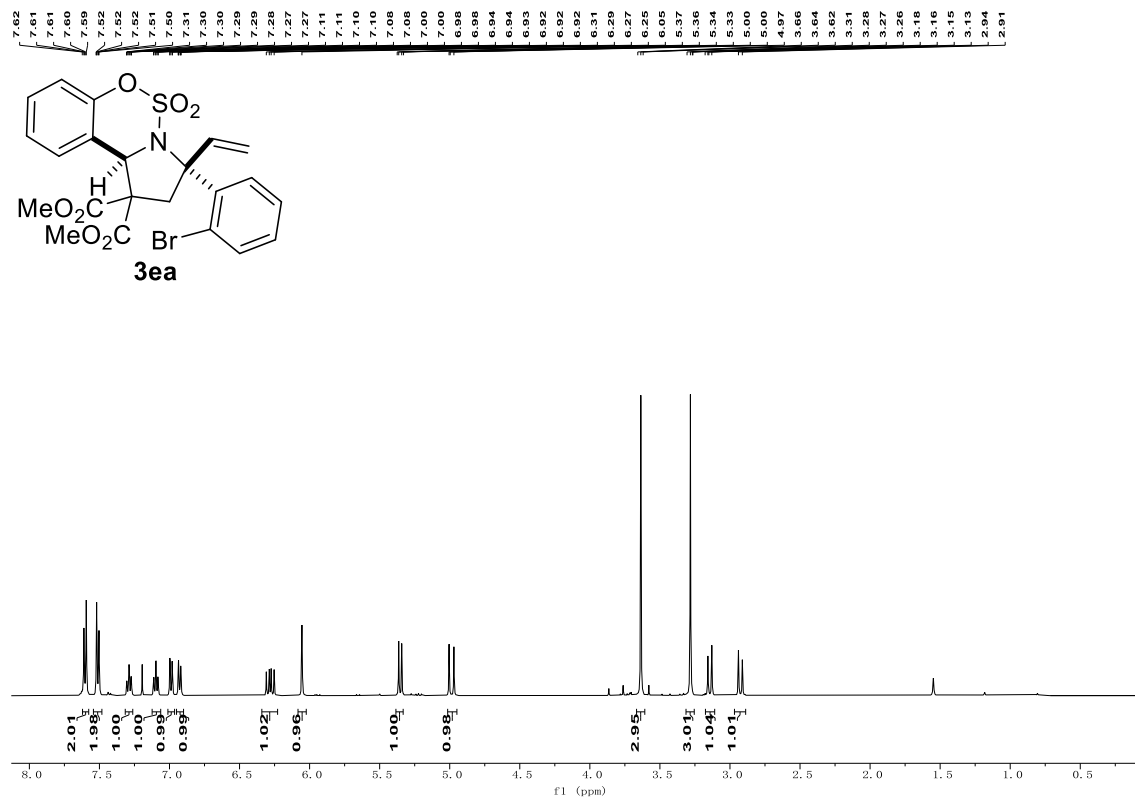

### <sup>13</sup>C NMR (126 MHz, CDCl<sub>3</sub>)

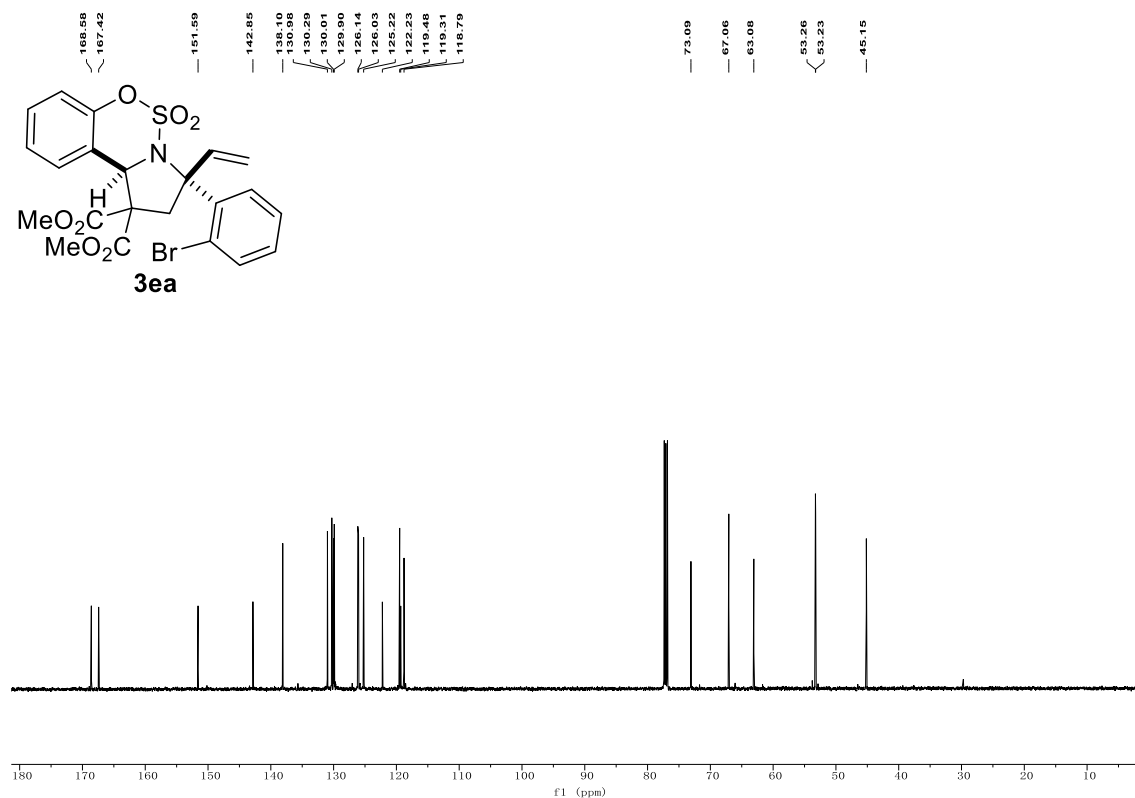

### $^1\text{H}$ NMR (500 MHz, $\text{CDCl}_3$ )

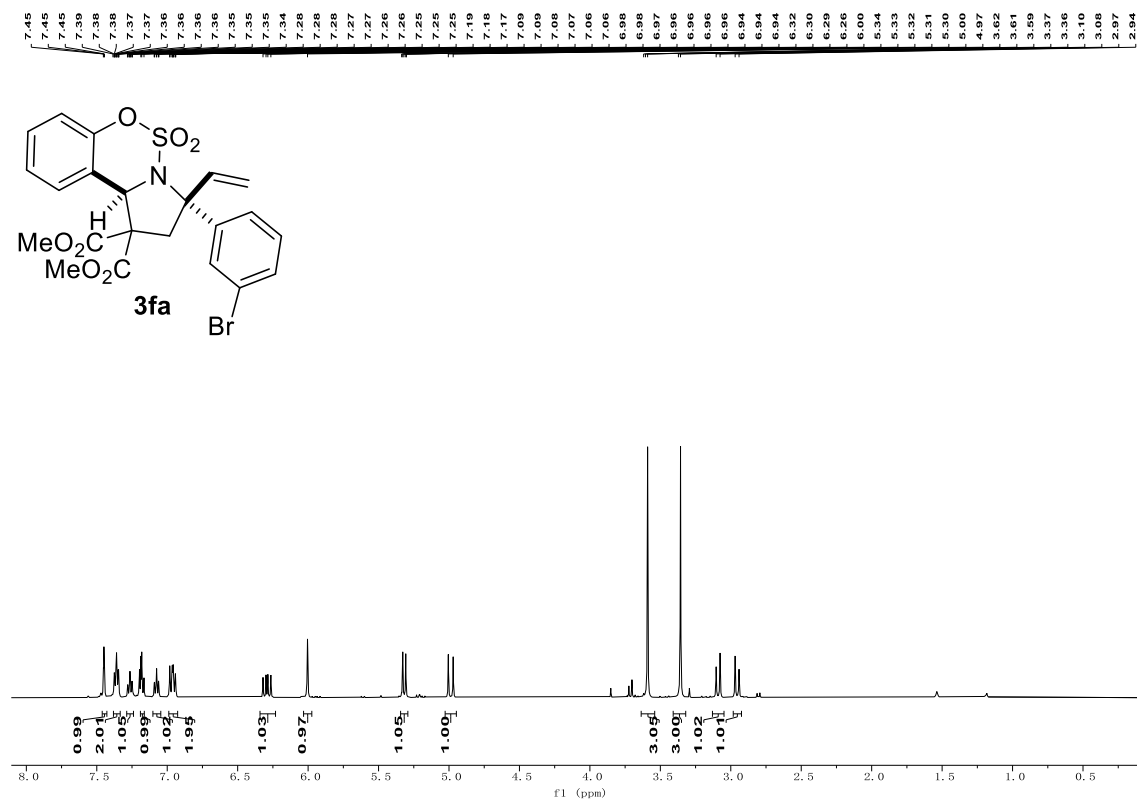

### $^{13}\text{C}$ NMR (126 MHz, $\text{CDCl}_3$ )

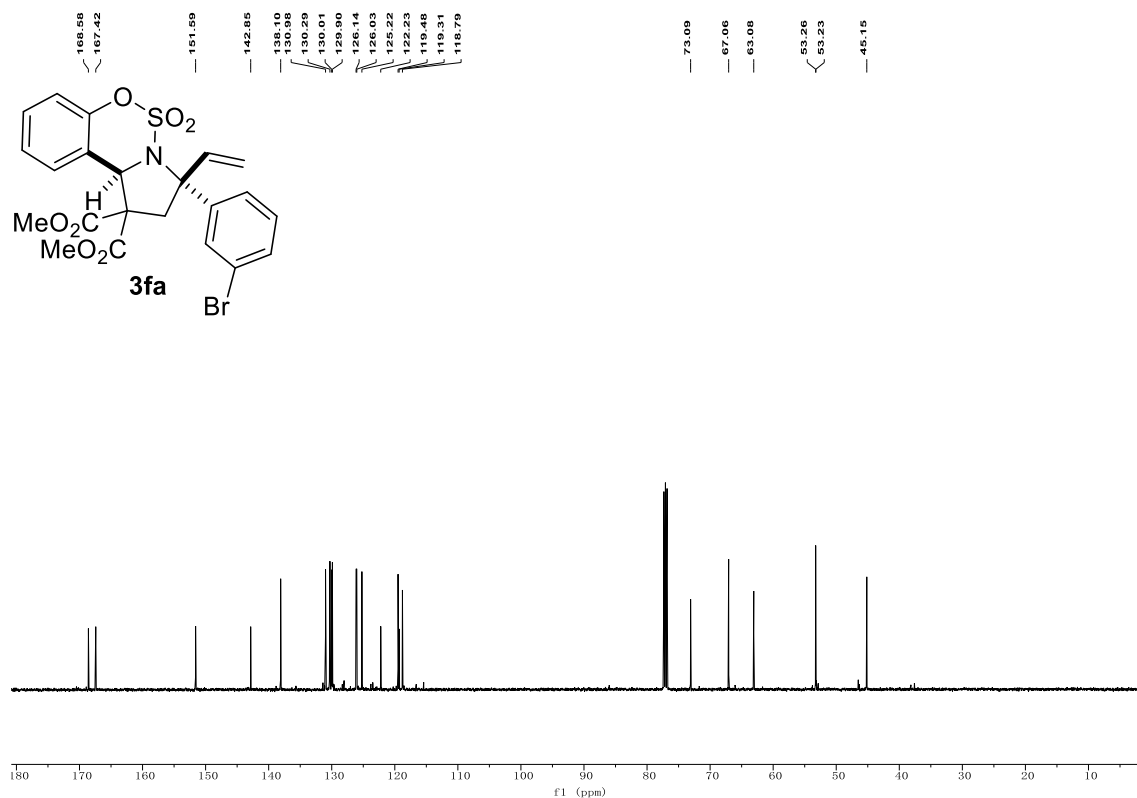

### <sup>1</sup>H NMR (500 MHz, CDCl<sub>3</sub>)

7.51, 7.50, 7.50, 7.49, 7.48, 7.48, 7.47, 7.36, 7.35, 7.35, 7.34, 7.34, 7.33, 7.32, 7.32, 7.32, 7.31, 7.31, 7.31, 7.17, 7.16, 7.15, 7.14, 7.13, 7.06, 7.06, 7.06, 7.04, 7.04, 7.03, 7.02, 7.02, 7.01, 7.01, 7.01, 6.37, 6.35, 6.34, 6.34, 6.32, 6.08, 5.40, 5.39, 5.38, 5.36, 5.35, 5.05, 5.02, 3.68, 3.67, 3.65, 3.65, 3.65, 3.41, 3.40, 3.39, 3.37, 3.36, 3.17, 3.14, 3.03, 3.00

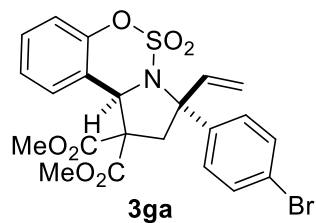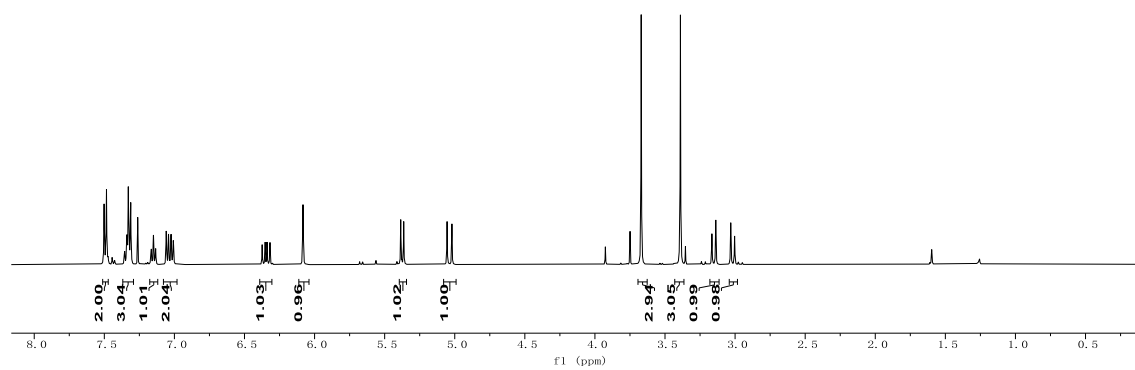

### <sup>13</sup>C NMR (126 MHz, CDCl<sub>3</sub>)

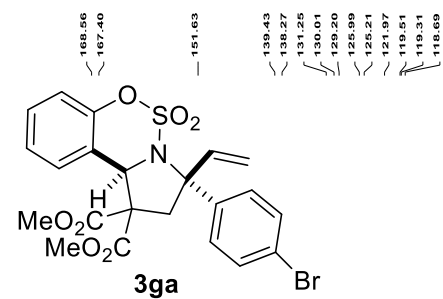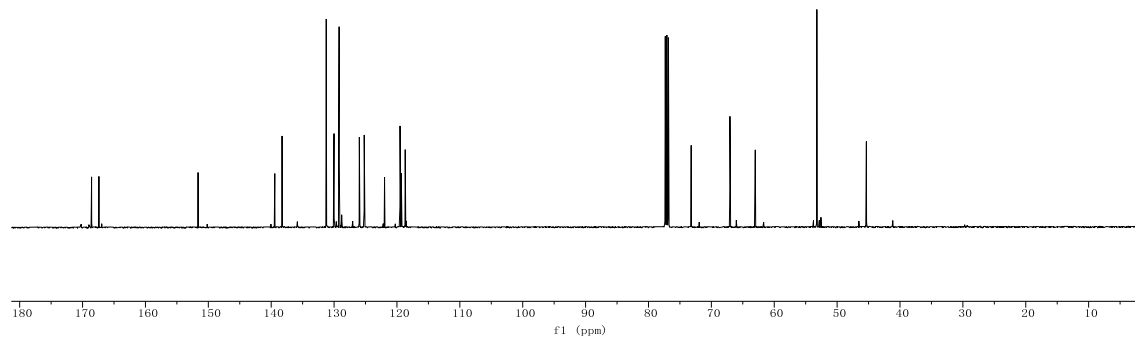

### <sup>1</sup>H NMR (500 MHz, CDCl<sub>3</sub>)

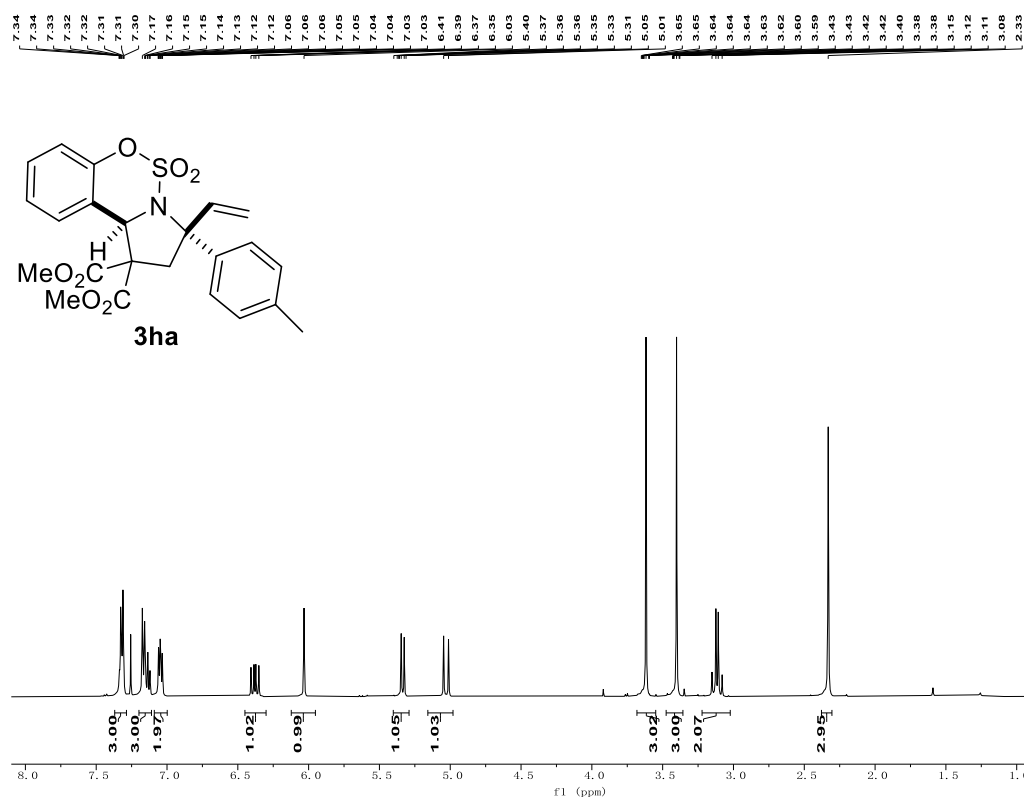

### <sup>13</sup>C NMR (126 MHz, CDCl<sub>3</sub>)

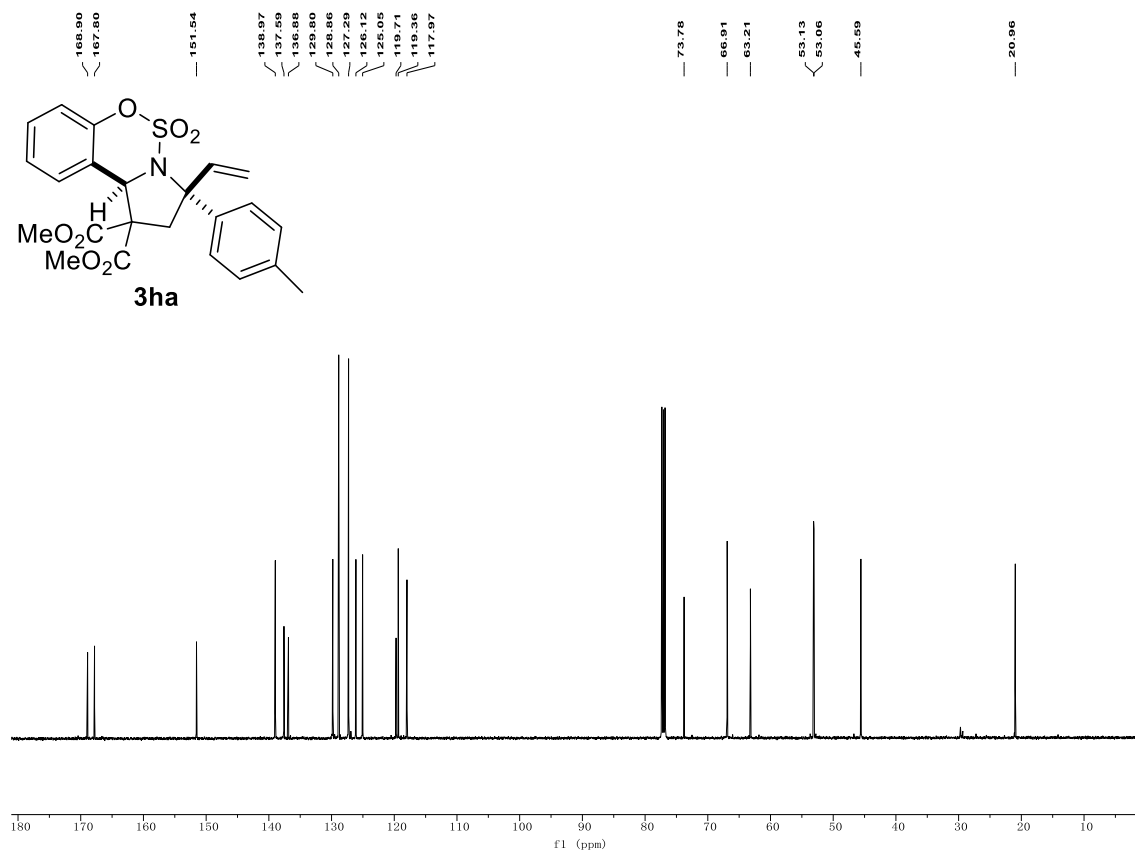



### $^1\text{H}$ NMR (500 MHz, $\text{CDCl}_3$ )

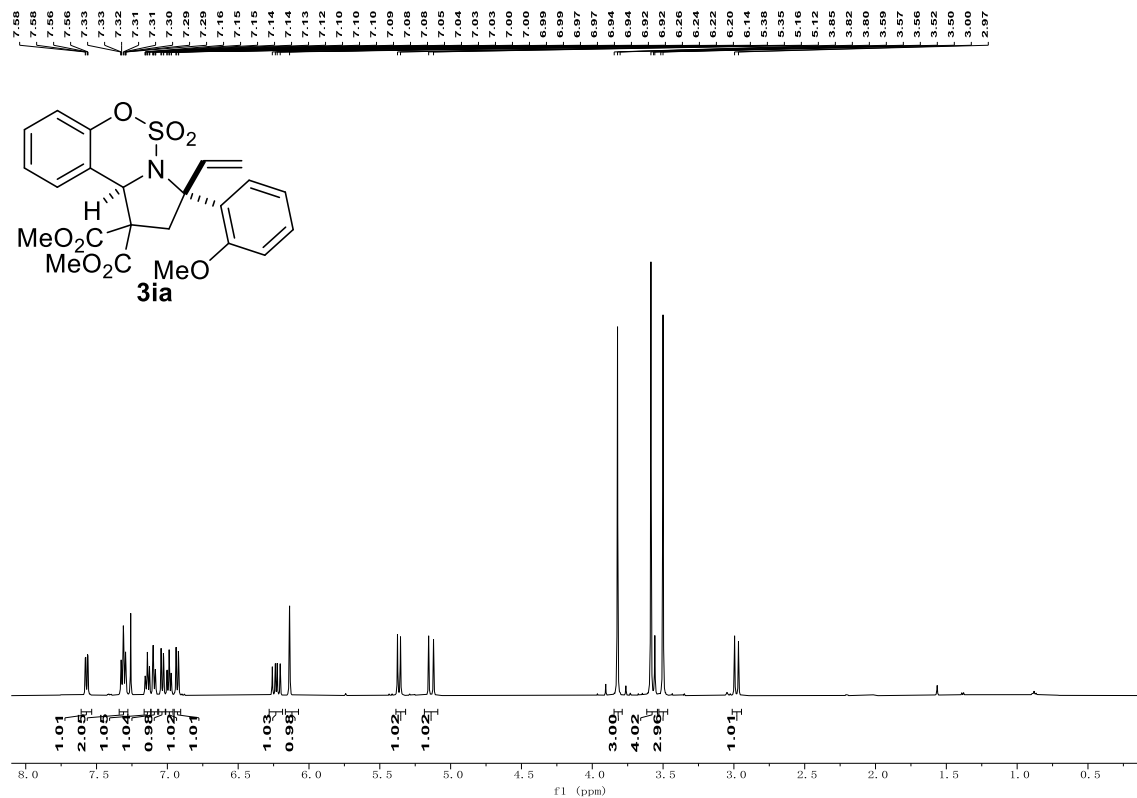

### $^{13}\text{C}$ NMR (126 MHz, $\text{CDCl}_3$ )

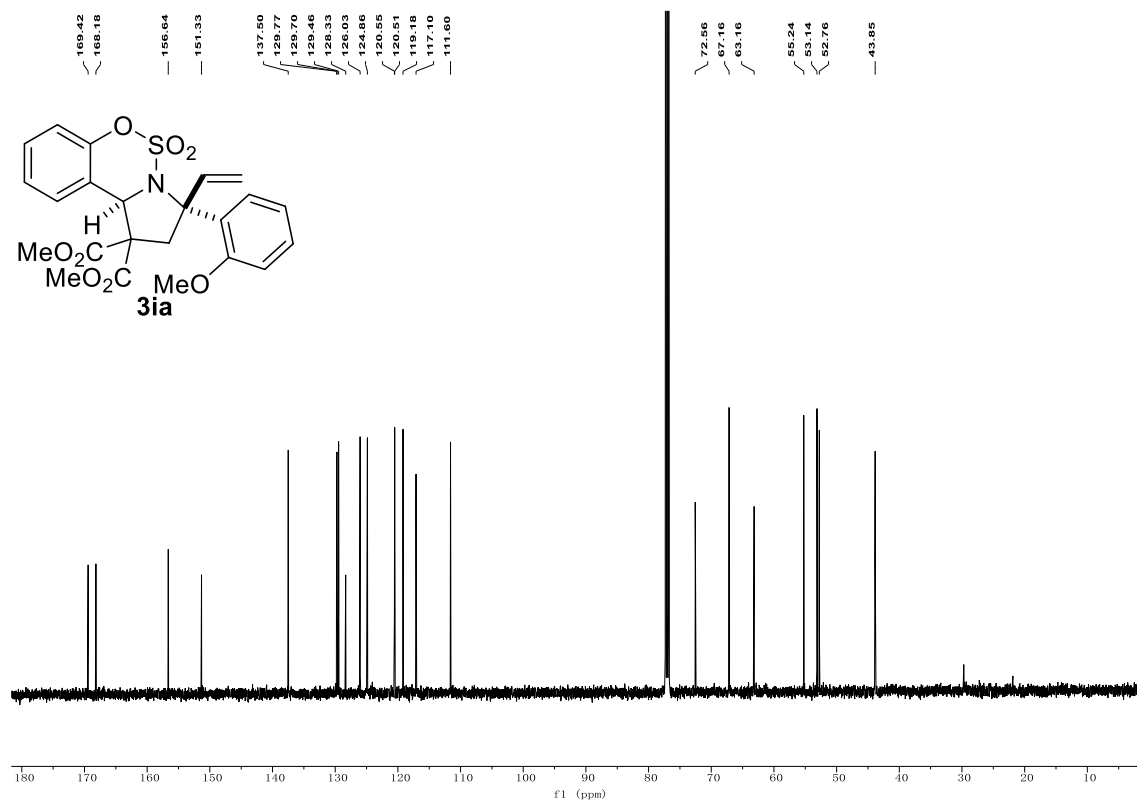

### $^1\text{H}$ NMR (500 MHz, $\text{CDCl}_3$ )

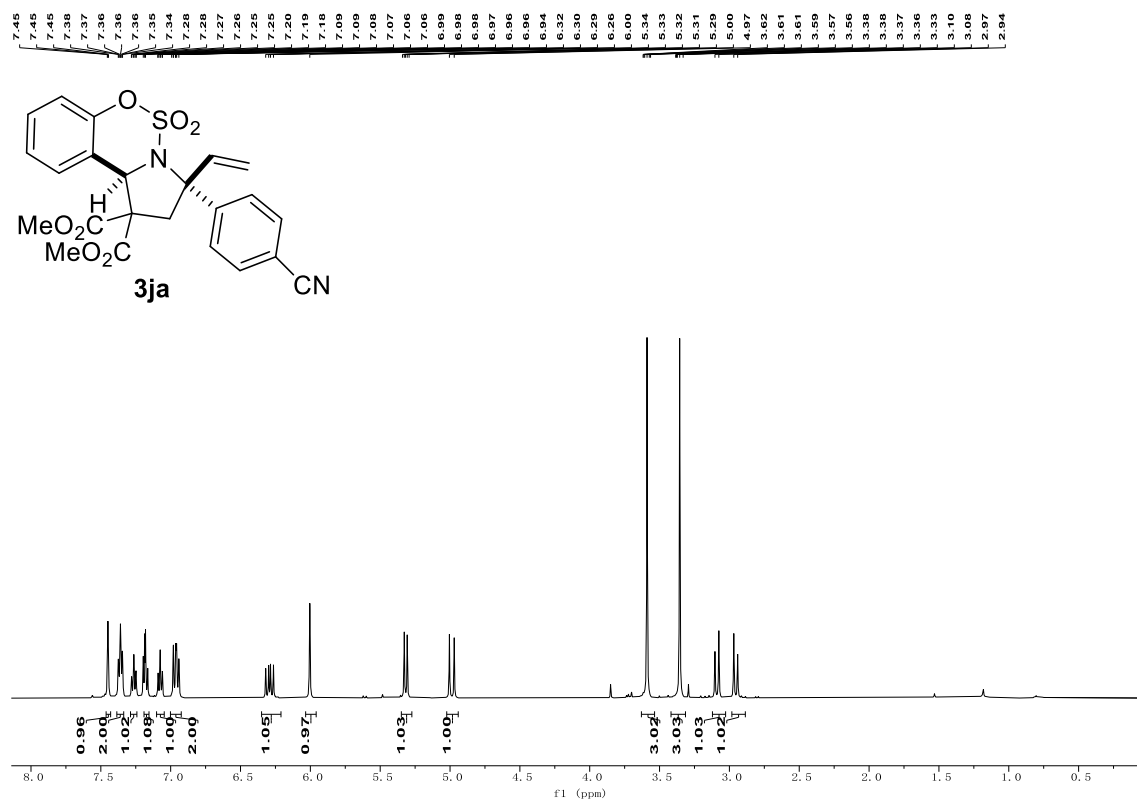

### $^{13}\text{C}$ NMR (126 MHz, $\text{CDCl}_3$ )

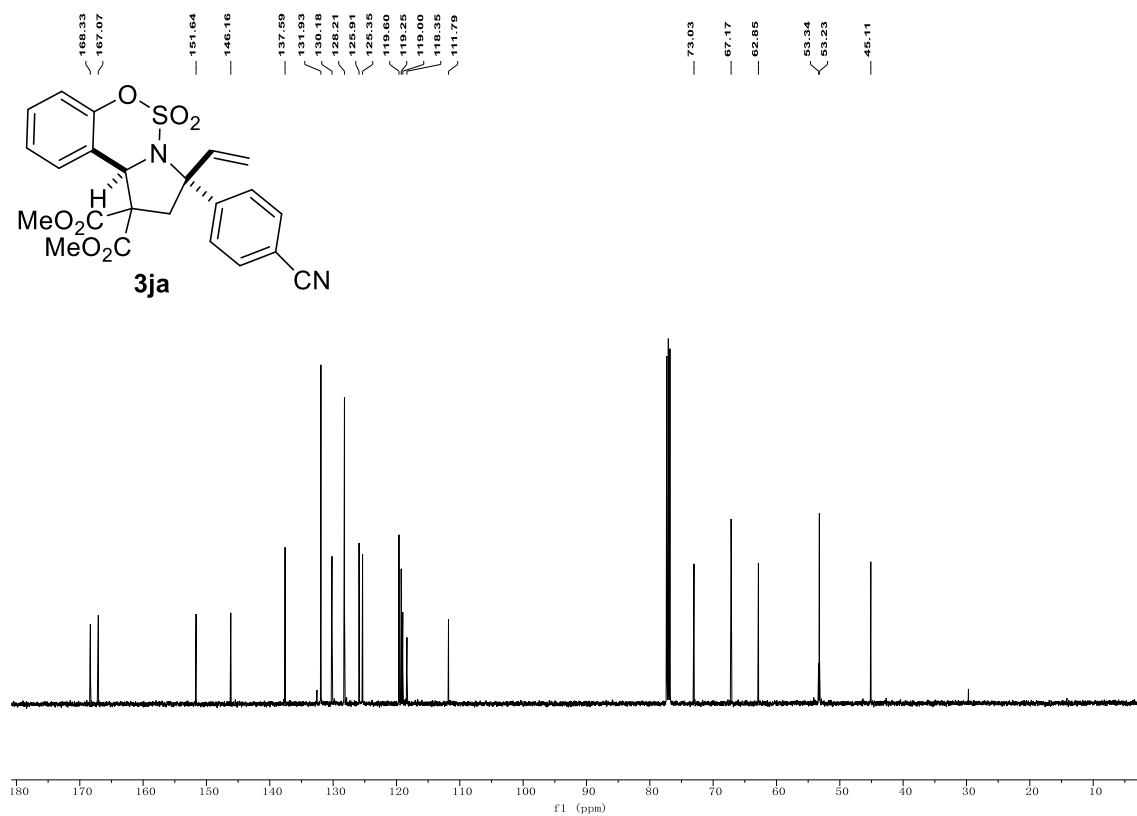

# <sup>1</sup>H NMR (500 MHz, CDCl<sub>3</sub>)

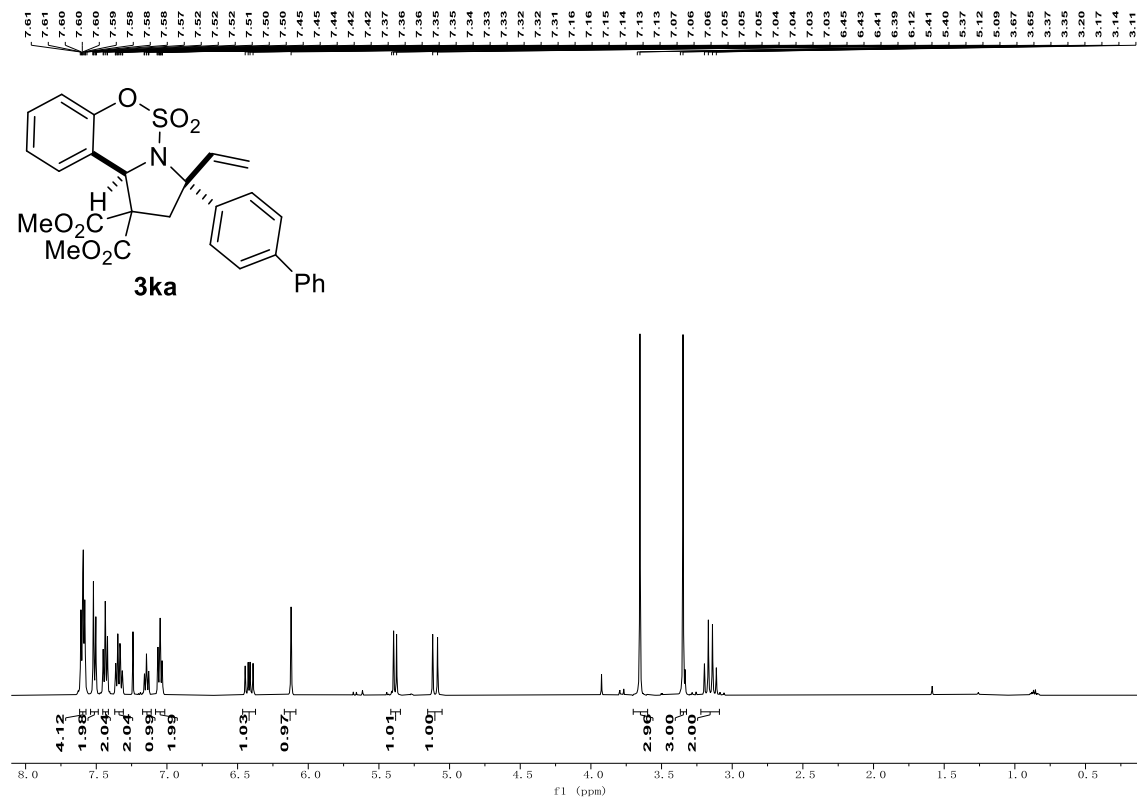

# <sup>13</sup>C NMR (126 MHz, CDCl<sub>3</sub>)

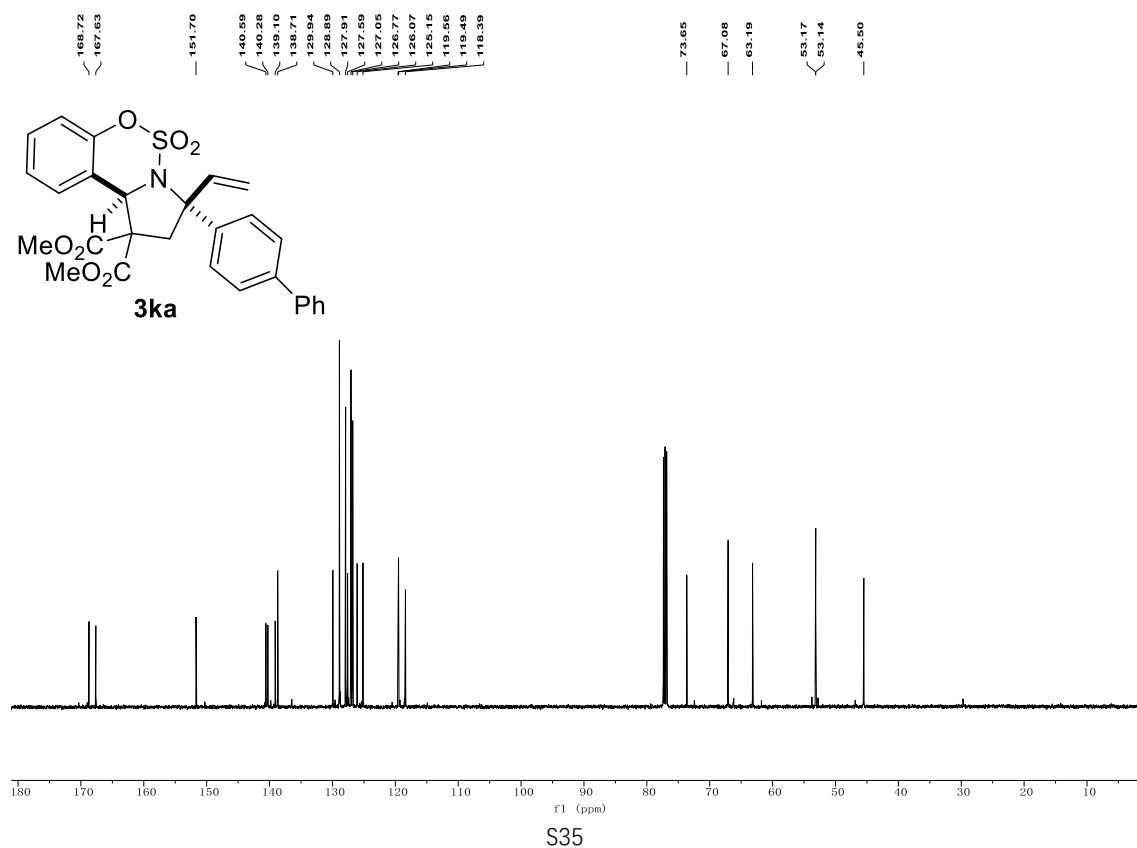

### $^1\text{H}$ NMR (500 MHz, $\text{CDCl}_3$ )

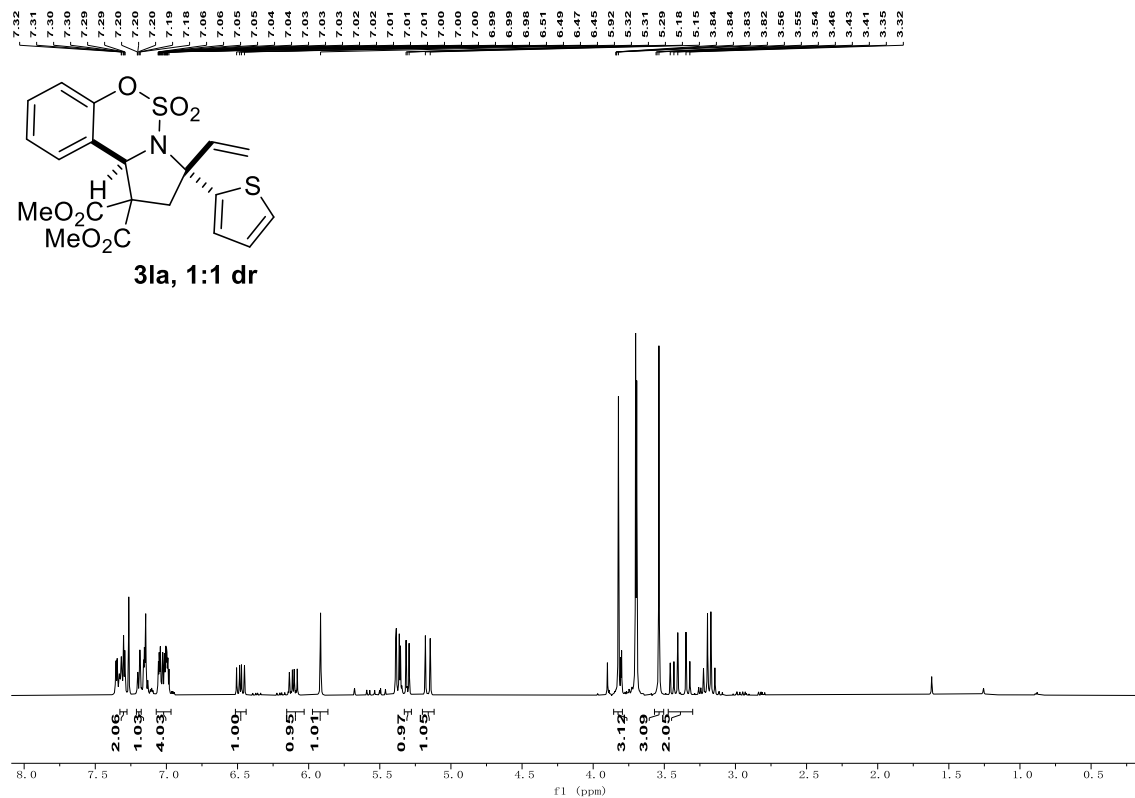

### $^{13}\text{C}$ NMR (126 MHz, $\text{CDCl}_3$ )

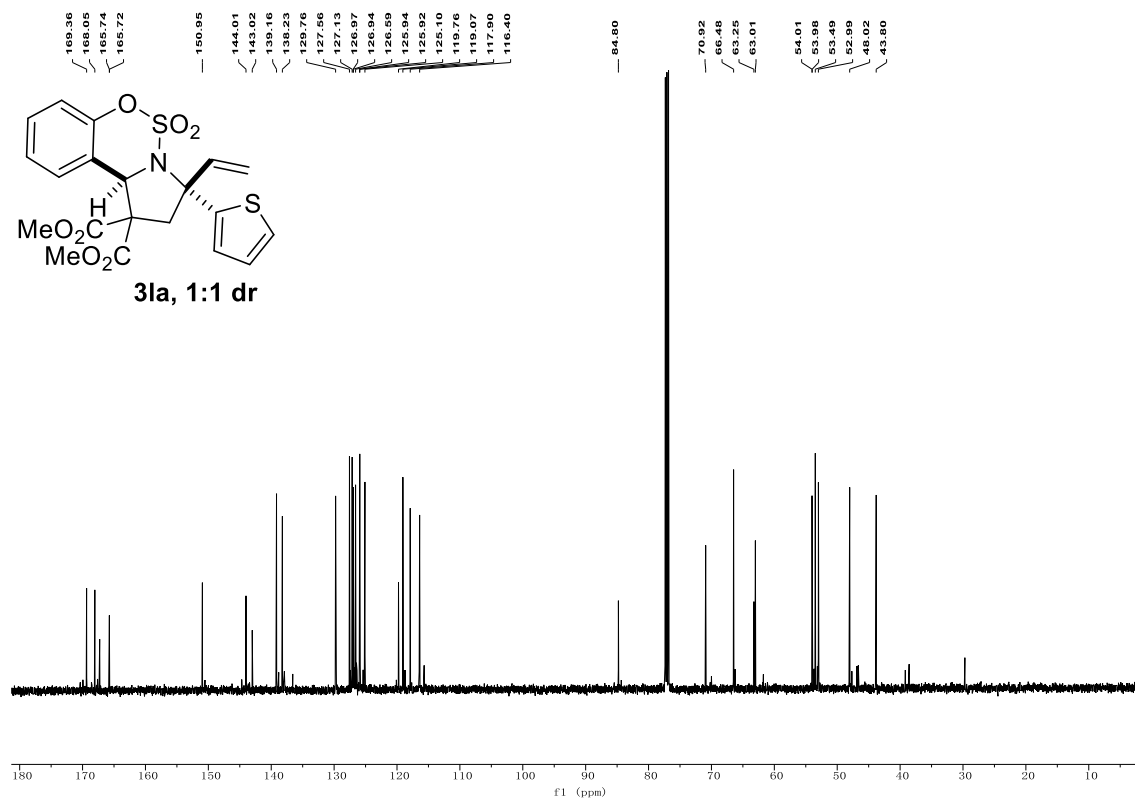

### <sup>1</sup>H NMR (500 MHz, CDCl<sub>3</sub>)

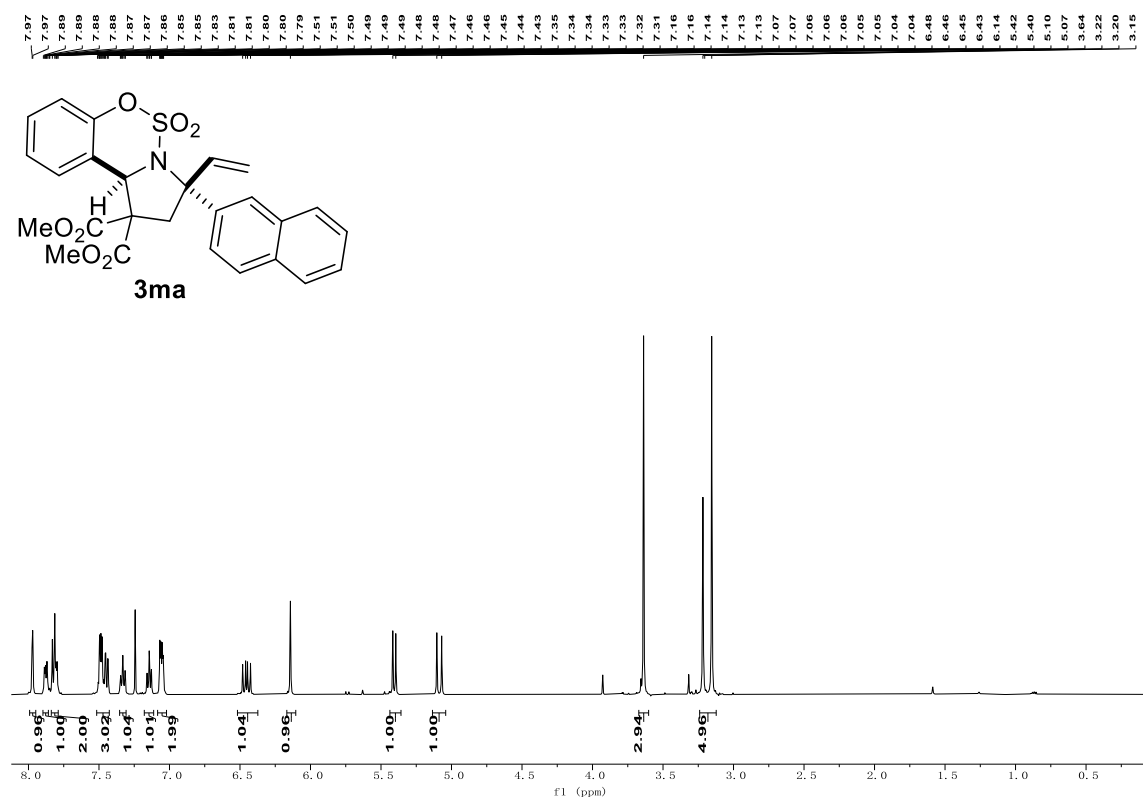

### <sup>13</sup>C NMR (126 MHz, CDCl<sub>3</sub>)

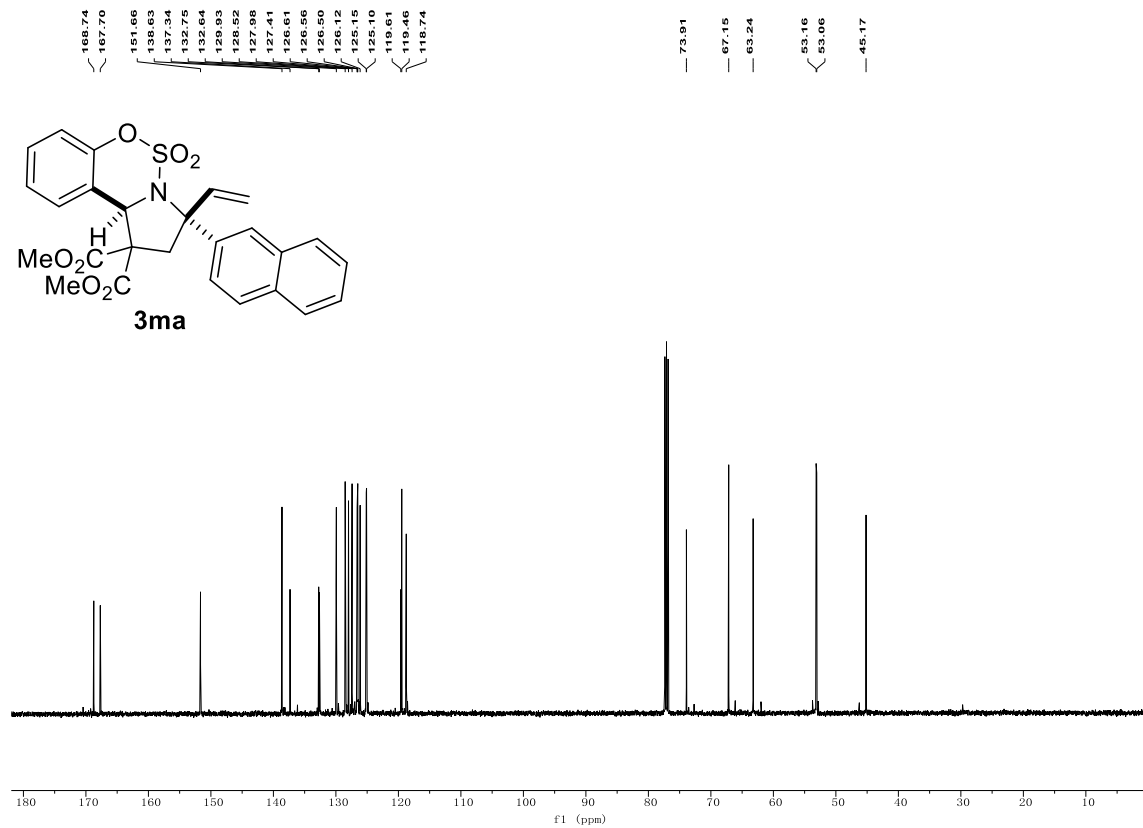

### <sup>1</sup>H NMR (500 MHz, CDCl<sub>3</sub>)

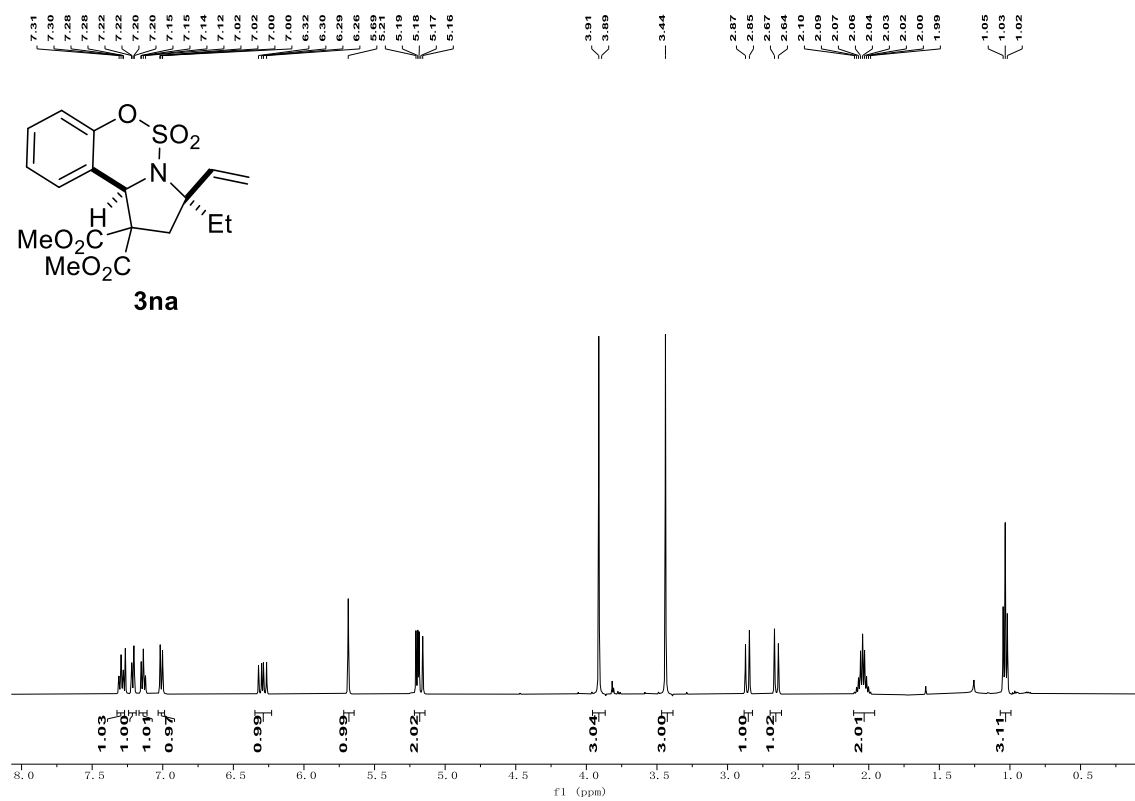

### <sup>13</sup>C NMR (126 MHz, CDCl<sub>3</sub>)

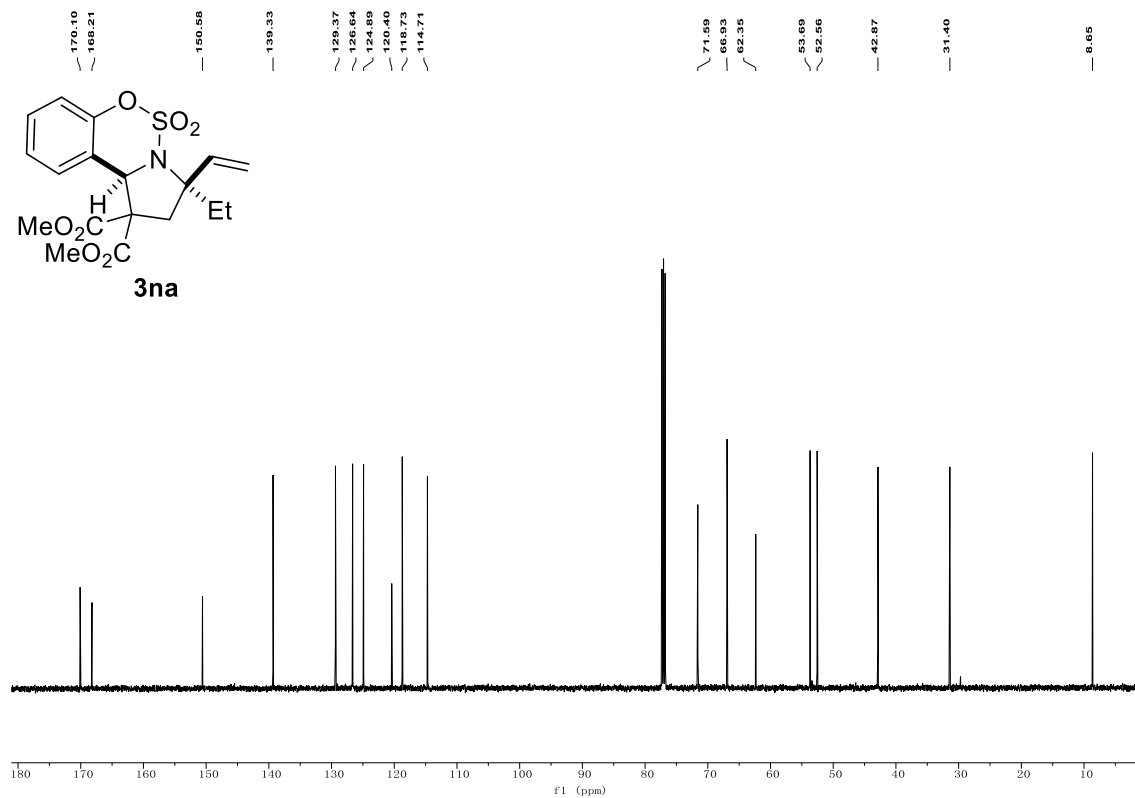

**$^1\text{H}$  NMR (500 MHz,  $\text{CDCl}_3$ )**

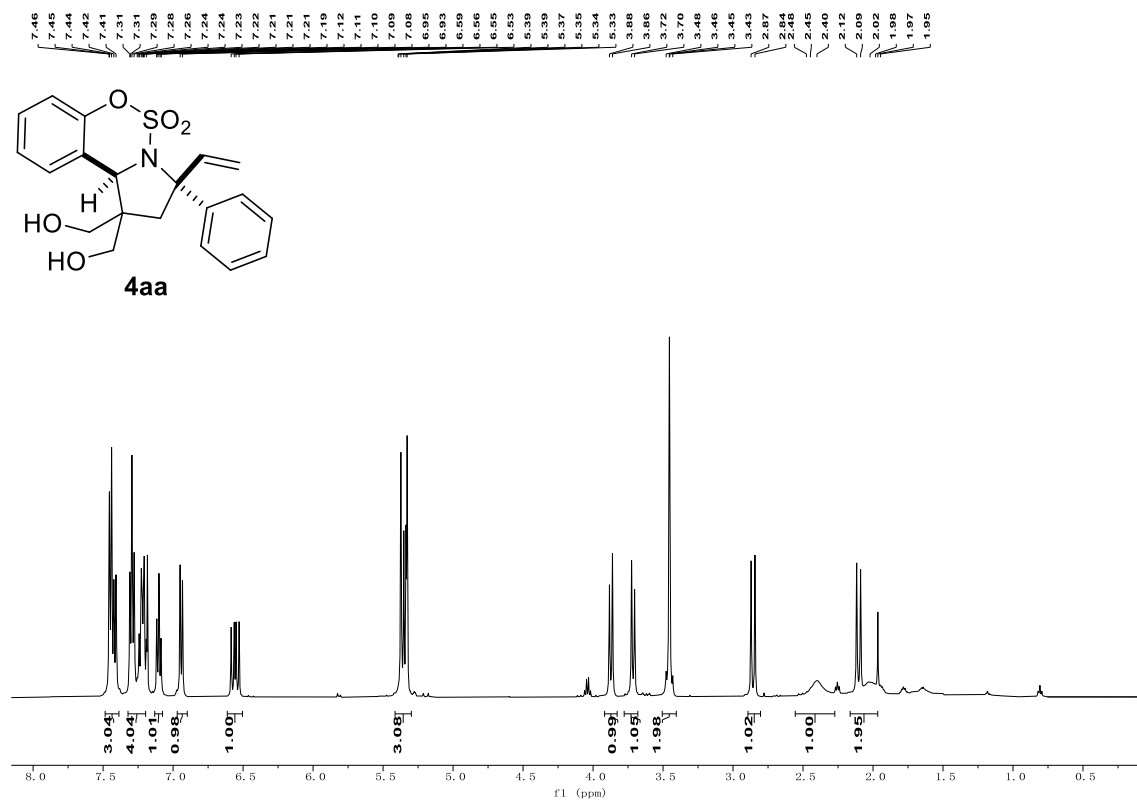

**$^{13}\text{C}$  NMR (126 MHz,  $\text{CDCl}_3$ )**

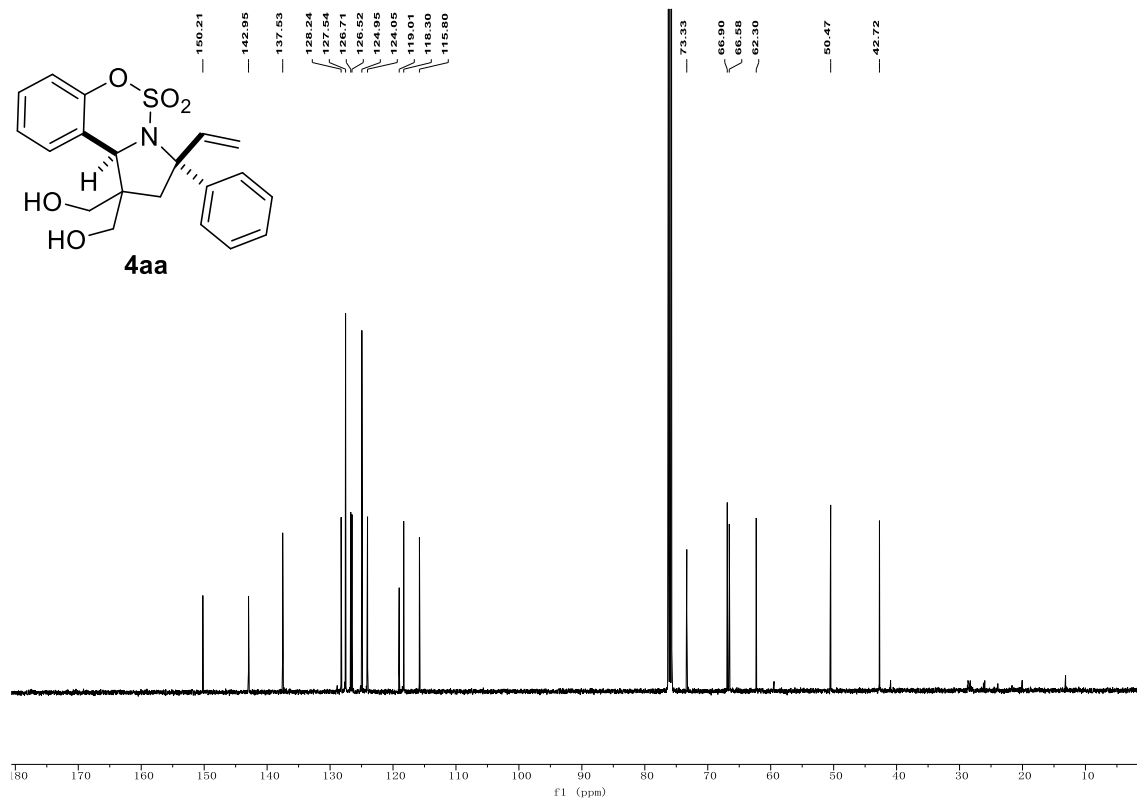

## HPLC Chromatogram of Product 3aa

HPLC chromatogram of racemic product 3aa

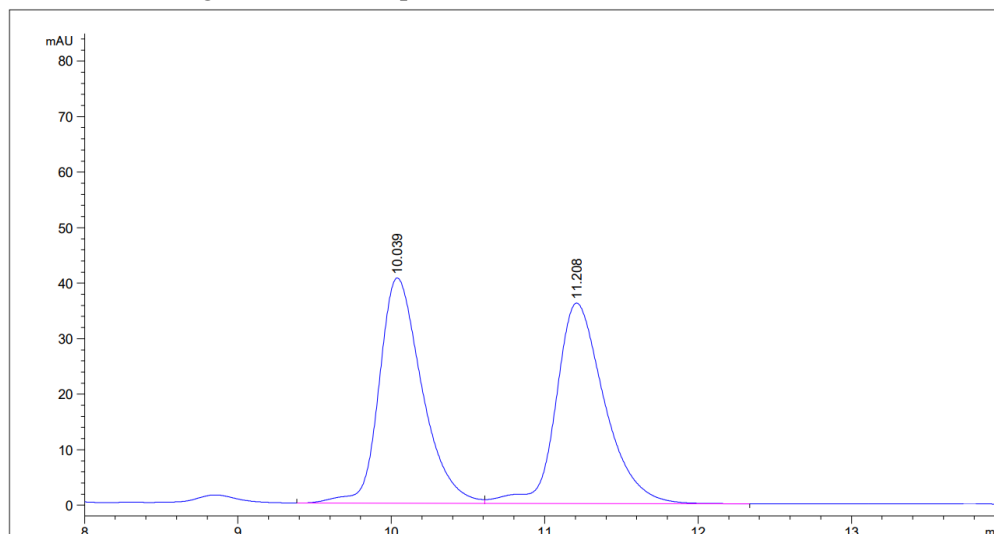

| Peak # | RetTime [min] | Type | Width [min] | Area [mAU*s] | Height [mAU] | Area %  |
|--------|---------------|------|-------------|--------------|--------------|---------|
| 1      | 10.039        | BV   | 0.2951      | 786.57825    | 40.58231     | 49.7736 |
| 2      | 11.208        | VB   | 0.3326      | 793.73364    | 36.09402     | 50.2264 |

HPLC chromatogram of chiral product 3aa

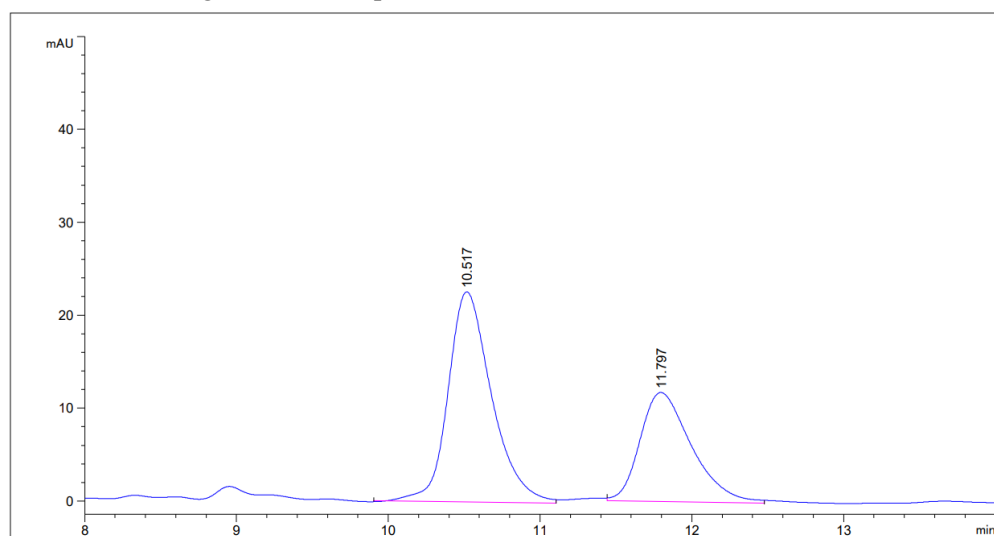

| Peak # | Ret Time [min] | Type | Width [min] | Area [mAU*s] | Height [mAU] | Area %  |
|--------|----------------|------|-------------|--------------|--------------|---------|
| 1      | 10.517         | MM R | 0.3320      | 450.32135    | 22.60950     | 62.0011 |
| 2      | 11.797         | MM R | 0.3922      | 275.99091    | 11.72741     | 37.9989 |



## X-ray Crystallographic Data of Product 3aa

Crystallographic data for **3aa** has been deposited with the Cambridge Crystallographic Data Centre as deposition number CCDC 2366186. These data can be obtained free of charge via [www.ccdc.cam.ac.uk/data\\_request/cif](http://www.ccdc.cam.ac.uk/data_request/cif), or by emailing [data\\_request-@ccdc.cam.ac.uk](mailto:data_request-@ccdc.cam.ac.uk), or by contacting The Cambridge Crystallographic Data Centre, 12, Union Road, Cambridge CB2 1EZ, UK; fax: +44 1223336033.

Single crystals suitable for X-ray diffraction were obtained by slow evaporation of the solvent from ethyl acetate/ petroleum ether(V/V=5/1) at RT. X-ray structure of complex **3aa** with 50% ellipsoid probability Crystal data.

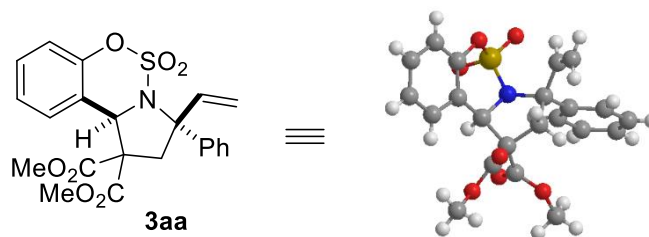

**Table 1** Crystal data and structure refinement for **3aa**.

|                                             |                                                               |
|---------------------------------------------|---------------------------------------------------------------|
| Identification code                         | <b>3aa</b>                                                    |
| Empirical formula                           | C <sub>22</sub> H <sub>21</sub> NO <sub>7</sub> S             |
| Formula weight                              | 443.46                                                        |
| Temperature/K                               | 293                                                           |
| Crystal system                              | monoclinic                                                    |
| Space group                                 | P2 <sub>1</sub> /n                                            |
| a/Å                                         | 8.98380(10)                                                   |
| b/Å                                         | 20.9681(2)                                                    |
| c/Å                                         | 11.6909(2)                                                    |
| α/°                                         | 90                                                            |
| β/°                                         | 109.1210(10)                                                  |
| γ/°                                         | 90                                                            |
| Volume/Å <sup>3</sup>                       | 2080.75(5)                                                    |
| Z                                           | 4                                                             |
| ρ <sub>calc</sub> /cm <sup>3</sup>          | 1.416                                                         |
| μ/mm <sup>-1</sup>                          | 1.781                                                         |
| F(000)                                      | 928.0                                                         |
| Crystal size/mm <sup>3</sup>                | 0.06 × 0.05 × 0.04                                            |
| Radiation                                   | CuKα (λ = 1.54184)                                            |
| 2θ range for data collection/°              | 8.434 to 135.928                                              |
| Index ranges                                | -10 ≤ h ≤ 10, -24 ≤ k ≤ 25, -12 ≤ l ≤ 13                      |
| Reflections collected                       | 20398                                                         |
| Independent reflections                     | 3749 [R <sub>int</sub> = 0.0323, R <sub>sigma</sub> = 0.0177] |
| Data/restraints/parameters                  | 3749/0/283                                                    |
| Goodness-of-fit on F <sup>2</sup>           | 1.043                                                         |
| Final R indexes [I ≥ 2σ (I)]                | R <sub>1</sub> = 0.0392, wR <sub>2</sub> = 0.1063             |
| Final R indexes [all data]                  | R <sub>1</sub> = 0.0401, wR <sub>2</sub> = 0.1072             |
| Largest diff. peak/hole / e Å <sup>-3</sup> | 0.34/-0.41                                                    |
